# Supplementary material
Source: publisher figshare collection journal article supplement (https://gsapubs.figshare.com/ndownloader/files/23317718)
Supplement: Supplementary file 1 [file 23317718]

## Sheet: Sup Mat 2
Supplemental Material 2: Full details for Ar isotope analyses. All uncertainties (except for the 40Ar/36Ar intercept) are erupted at the 1σ level.
Journal Title: Geological Society of America Bulletin
Manuscript Title: The timing and compositional evolution of volcanism within northern Harrat Rahat, Kingdom of Saudi Arabia
Authors: Mark E. Stelten , Drew T. Downs, Duane E. Champion, Hannah R. Dietterich, Andrew T. Calvert, Thomas W. Sisson, Gail A. Mahood , and Hani Zahran
Corresponding author: Mark E. Stelten , United States Geological Survey, Menlo Park, CA
Corresponding author e-mail: mstelten@usgs.gov
Note: Data in this supplement are the original data files generated when analyzing the samples. For each analysis the assumed fluence monitor age and R(FCs/BHs) are given, where FCs is Fish Canyon sanidine and BHs is Bodie Hills sanidine. For samples analyzed prior to July 2016, BHs was used as a fluence monitor with an assumed age of 9.635 ± 0.003 Ma that is equivalent to FCs at 27.642 ± 0.012 (…
R17AC132	Fluence monitor = Bodie Hills sanidine @ 9.7970 ± 0.0031 Ma, equivalent to Fish Canyon sanidine @ 28.1053 ± 0.0124 Ma with R(FCs/BHs) of 2.88340 ± 0.00089
Temp(°C)	Age(ka)	%40Ar*	K/Ca	K/Cl	moles 40Ar*	%39Ar	40Ar	39Ar	38Ar	37Ar	36Ar
550	-170.4±142.1	-5.72	0.28	-59	-7.652e-16	0.03	0.187922±0.002960	0.024742±0.000264	-0.001343±0.000094	0.046827±0.001382	0.000679±0.000028
625	-50.2±82.2	-2.35	0.29	-125	-4.214e-16	0.09	0.251646±0.002925	0.046220±0.000271	-0.000813±0.000062	0.084447±0.001716	0.000886±0.000031
700	89.2±29.8	5.27	0.3	-418	2.169e-15	0.26	0.578679±0.002409	0.133904±0.000235	0.000733±0.000076	0.235374±0.001091	0.001902±0.000033
775	207.8±21.1	13.7	0.29	-1032	4.802e-15	0.42	0.492637±0.000838	0.127293±0.000139	0.001415±0.000052	0.226508±0.001153	0.001487±0.000023
850	258.1±22.4	14.28	0.26	-2854	4.816e-15	0.55	0.474095±0.000513	0.102784±0.000159	0.001455±0.000046	0.203450±0.001325	0.001418±0.000020
925	198.6±29.8	8.5	0.19	-2297	2.505e-15	0.64	0.414364±0.000355	0.069516±0.000124	0.001026±0.000046	0.195177±0.000808	0.001325±0.000018
1000	235.2±44.5	7.05	0.14	-1242	1.933e-15	0.7	0.385070±0.000327	0.045312±0.000107	0.000667±0.000038	0.167803±0.001792	0.001246±0.000017
1100	234.4±29.8	6.77	0.15	-4043	3.175e-15	0.79	0.654802±0.000350	0.074197±0.000118	0.001285±0.000042	0.261832±0.000674	0.002118±0.000019
1150	329.5±58.7	4.11	0.09	988	2.88e-15	0.85	0.984874±0.000447	0.048279±0.000132	0.001441±0.000042	0.279008±0.001793	0.003241±0.000024
1200	366.9±60.9	3.05	0.02	2135	4.503e-15	0.94	2.076795±0.000857	0.068582±0.000129	0.002333±0.000057	1.502270±0.001853	0.007166±0.000034
1275	212.4±70.1	1.84	0.02	3462	1.678e-15	1	1.283681±0.000547	0.044154±0.000104	0.001446±0.000041	0.969593±0.001789	0.004493±0.000025
1375	275.4±519.4	2.34	0.01	-136	1.79e-16	1	0.107435±0.000369	0.003677±0.000042	0.000004±0.000023	0.142487±0.001169	0.000391±0.000016
Packet IRR364-YN, Experiment #17Z0196, 0.151 g Basalt, all errors ±1 sigma
J = 0.000216956533 ± 0.000000290043	2017-10-13
40Ar* is radiogenic argon, isotopes in volts (7.12e-14 moles/volt), corrected for blank, background, discrimination, and decay
Calculated bulk K/Ca = 9.553e-2 ± 4.219e-2, Calculated K2O = 0.66%wt., Calculated CaO = 8.42%wt., Calculated Cl = -1.2ppm
Total Gas Age = 192.1 ± 12.3 ka
Weighted Mean Plateau Age = 235.2 ± 11.4 ka (±1 sigma, including ±J), 74.0% 39Ar released
Weighted Mean Plateau Age = 235.2 ± 11.4 ka (A priori, including ±J), 74.0% 39Ar released
Weighted Mean Plateau Age = 235.2 ± 26.8 ka (95% confidence, including ±J)
MSWD = 1.45 (Good fit, MSWD < 2.19)
Plateau K/Ca = 0.175
Plateau K/Cl = -1030
% radiogenic (plateau norm.) = 8.8
Steps 9 of 12 (775,850,925,1000,1100,1150,1200,1275,1375°C)
Isochron Age = 208.9 ± 16.9 ka (±1 sigma, including ±J)
Isochron Age = 208.9 ± 16.7 ka (A Priori Errors, including ±J)
Isochron Age = 208.9 ± 38.2 ka (95% confidence, including ±J)
MSWD = 1.02 (Good fit, MSWD < 2.29)
40Ar/36Ar intercept = 301.3 ± 1.3 (±1 sigma)
40Ar/36Ar intercept = 301.3 ± 1.3 (A Priori)
40Ar/36Ar intercept = 301.3 ± 3.0 (95% confidence)
Steps 9 of 12 (775,850,925,1000,1100,1150,1200,1275,1375°C)
-----------------
R15MS028	Fluence monitor = Bodie Hills sanidine @ 9.635 ± 0.003 Ma, equivalent to Fish Canyon sanidine @ 27.642 ± 0.012 Ma with R(FCs/BHs) of 2.88340 ± 0.00089
Temp(°C)	Age(ka)	%40Ar*	K/Ca	K/Cl	moles 40Ar*	%39Ar	40Ar	39Ar	38Ar	37Ar	36Ar
550	176.5±35.3	2.05	0.33	-2304	4.335e-15	0.1	1.421556±0.000452	0.067693±0.000093	0.001647±0.000039	0.108904±0.000285	0.004743±0.000020
625	191.9±31.6	2.02	0.26	-3299	5.239e-15	0.21	1.750212±0.000452	0.075833±0.000097	0.001986±0.000034	0.151407±0.000368	0.005845±0.000020
700	267.3±37.3	2.42	0.29	-4756	4.768e-15	0.28	1.328795±0.000417	0.049524±0.000067	0.001428±0.000031	0.090543±0.000163	0.004413±0.000015
775	225.7±40.5	2.33	0.29	-5844	4.037e-15	0.35	1.172149±0.000345	0.049668±0.000066	0.001343±0.000021	0.089034±0.000277	0.003899±0.000017
850	269.0±41.6	3.03	0.24	-16607	4.586e-15	0.41	1.023071±0.000335	0.047357±0.000066	0.001240±0.000027	0.101665±0.000352	0.003386±0.000016
950	206.5±39.3	2.71	0.21	-18968	3.651e-15	0.48	0.911360±0.000326	0.049123±0.000065	0.001198±0.000026	0.124803±0.000245	0.003036±0.000016
1050	178.1±26.9	2.33	0.2	9318	4.935e-15	0.59	1.430618±0.000487	0.077002±0.000080	0.001936±0.000027	0.201799±0.000420	0.004785±0.000017
1100	178.4±34.1	2.05	0.23	4927	4.126e-15	0.69	1.360516±0.000475	0.064230±0.000071	0.001746±0.000022	0.146645±0.000278	0.004551±0.000018
1150	197.3±25.5	2.27	0.14	1709	7.696e-15	0.84	2.294722±0.000579	0.108489±0.000126	0.003126±0.000058	0.417536±0.000759	0.007707±0.000023
1200	288.6±30.9	3.17	0.05	2454	9.861e-15	0.98	2.101214±0.000730	0.095517±0.000111	0.002733±0.000032	1.080652±0.001037	0.007189±0.000023
1275	556.6±122.2	3.67	0.02	6000	2.951e-15	1	0.542954±0.000253	0.014932±0.000048	0.000545±0.000019	0.321594±0.000523	0.001860±0.000015
1350	1935.6±742.9	7.78	0.01	-341	1.276e-15	1	0.110872±0.000226	0.001888±0.000032	0.000069±0.000014	0.085413±0.000471	0.000370±0.000011
Packet IRR349-MV, Experiment #16Z0122, 0.1531 g Basalt, all errors ±1 sigma
J = 0.0002275208798 ± 1.929987E-07
40Ar* is radiogenic argon, isotopes in volts (1.48e-13 moles/volt), corrected for blank, background, discrimination, and decay
Calculated bulk K/Ca = 0.126 ± 5.444e-2, Calculated K2O = 1.14%wt., Calculated CaO = 11.15%wt., Calculated Cl = 8.0e-2ppm
Total Gas Age = 227.8 ± 10.2 ka
Weighted Mean Plateau Age = 213.2 ± 13.3 ka (±1 sigma, including ±J), 97.6% 39Ar released
Weighted Mean Plateau Age = 213.2 ± 10.4 ka (A priori, including ±J), 97.6% 39Ar released
Weighted Mean Plateau Age = 213.2 ± 30.7 ka (95% confidence, including ±J)
MSWD = 1.63 (Good fit, MSWD < 2.11)
Plateau K/Ca = 0.2072
Plateau K/Cl = -1753.0000
% radiogenic (plateau norm.) = 2.4299
Steps 10 of 12 (550,625,700,775,850,950,1050,1100,1150,1200°C)
Isochron Age = 1.8 ± 120.5 ka (±1 sigma, including ±J)
Isochron Age = 1.8 ± 105.9 ka (A Priori Errors, including ±J)
Isochron Age = 1.8 ± 272.5 ka (95% confidence, including ±J)
MSWD = 1.29 (Good fit, MSWD < 2.19)
40Ar/36Ar intercept = 302.7 ± 4.1 (±1 sigma)
40Ar/36Ar intercept = 302.7 ± 3.6 (A Priori)
40Ar/36Ar intercept = 302.7 ± 9.3 (95% confidence)
Steps 10 of 12 (550,625,700,775,850,950,1050,1100,1150,1200°C)
-----------------
R15MS029	Fluence monitor = Bodie Hills sanidine @ 9.635 ± 0.003 Ma, equivalent to Fish Canyon sanidine @ 27.642 ± 0.012 Ma with R(FCs/BHs) of 2.88340 ± 0.00089
Temp(°C)	Age(ka)	%40Ar*	K/Ca	K/Cl	moles 40Ar*	%39Ar	40Ar	39Ar	38Ar	37Ar	36Ar
550	216.5±24.1	5.55	0.39	-2905	4.49e-15	0.07	0.546864±0.000266	0.055934±0.000078	0.000981±0.000038	0.074259±0.000373	0.001769±0.000011
625	239.7±17.9	6.75	0.42	-2169	6.962e-15	0.16	0.696826±0.000351	0.078333±0.000092	0.001288±0.000032	0.098230±0.000697	0.002226±0.000012
700	213.5±27.1	4.65	0.37	-4755	3.661e-15	0.21	0.531703±0.000385	0.046260±0.000085	0.000888±0.000023	0.066117±0.000553	0.001734±0.000011
775	203.0±27.9	4.67	0.37	-5846	3.742e-15	0.27	0.541784±0.000208	0.049719±0.000059	0.000945±0.000027	0.071182±0.000349	0.001768±0.000012
850	192.2±31.7	4.98	0.31	-29281	3.495e-15	0.33	0.474317±0.000295	0.049047±0.000071	0.000924±0.000027	0.081636±0.000476	0.001548±0.000013
950	209.5±36.5	5.2	0.27	-25370	4.095e-15	0.39	0.532353±0.000374	0.052734±0.000089	0.001006±0.000038	0.102209±0.000571	0.001736±0.000016
1050	143.7±17.7	3.28	0.26	7217	5.717e-15	0.51	1.177397±0.000355	0.107356±0.000089	0.002200±0.000031	0.212944±0.001092	0.003913±0.000016
1125	287.9±21.0	3.92	0.19	2754	1.325e-14	0.66	2.283871±0.000661	0.124250±0.000108	0.003222±0.000031	0.337515±0.001039	0.007520±0.000022
1175	292.5±16.6	4.61	0.1	2516	2.784e-14	0.95	4.081010±0.001056	0.257374±0.000147	0.006315±0.000040	1.394188±0.001635	0.013565±0.000035
1225	713.9±46.4	8.26	0.06	3194	8.91e-15	0.99	0.729198±0.000287	0.033840±0.000058	0.000920±0.000020	0.311499±0.001083	0.002351±0.000013
1275	-75.5±271.8	-0.73	0.06	1760	-8.246e-17	1	0.076484±0.000102	0.002963±0.000016	0.000095±0.000011	0.026702±0.000309	0.000268±0.000007
1350	-490.6±302.7	-3.76	0.06	655	-4.708e-16	1	0.084673±0.000110	0.002603±0.000017	0.000107±0.000010	0.024291±0.000273	0.000304±0.000007
Packet IRR346-LN, Experiment #16Z0089, 0.1498 g Basalt, all errors ±1 sigma
J = 0.000221038095018 ± 2.700506E-07
40Ar* is radiogenic argon, isotopes in volts (1.48e-13 moles/volt), corrected for blank, background, discrimination, and decay
Calculated bulk K/Ca = 0.161 ± 8.626e-2, Calculated K2O = 1.48%wt., Calculated CaO = 11.25%wt., Calculated Cl = 0.2ppm
Total Gas Age = 256.1 ± 7.7 ka
Weighted Mean Plateau Age = 218.8 ± 10.4 ka (±1 sigma, including ±J), 38.6% 39Ar released
Weighted Mean Plateau Age = 218.8 ± 10.4 ka (A priori, including ±J), 38.6% 39Ar released
Weighted Mean Plateau Age = 218.8 ± 20.4 ka (95% confidence, including ±J)
MSWD = 0.50 (Good fit, MSWD < 2.56)
Plateau K/Ca = 0.3605
Plateau K/Cl = -1.0892e+4
% radiogenic (plateau norm.) = 5.4353
Steps 6 of 12 (550,625,700,775,850,950°C)
Isochron Age = 323.2 ± 99.7 ka (±1 sigma, including ±J)
Isochron Age = 323.2 ± 99.7 ka (A Priori Errors, including ±J)
Isochron Age = 323.2 ± 225.5 ka (95% confidence, including ±J)
MSWD = 0.36 (Good fit, MSWD < 2.77)
40Ar/36Ar intercept = 287.2 ± 7.8 (±1 sigma)
40Ar/36Ar intercept = 287.2 ± 7.8 (A Priori)
40Ar/36Ar intercept = 287.2 ± 17.8 (95% confidence)
Steps 6 of 12 (550,625,700,775,850,950°C)
-----------------
R16DD205	Fluence monitor = Bodie Hills sanidine @ 9.635 ± 0.003 Ma, equivalent to Fish Canyon sanidine @ 27.642 ± 0.012 Ma with R(FCs/BHs) of 2.88340 ± 0.00089
Temp(°C)	Age(ka)	%40Ar*	K/Ca	K/Cl	moles 40Ar*	%39Ar	40Ar	39Ar	38Ar	37Ar	36Ar
550	681.7±57.7	34.79	0.27	-1341	3.902e-15	0.02	0.075801±0.000573	0.016007±0.000041	0.000191±0.000016	0.030503±0.000304	0.000174±0.000007
625	511.0±21.9	29.17	0.3	-6682	1.229e-14	0.12	0.284701±0.001479	0.067246±0.000083	0.000969±0.000026	0.115632±0.000126	0.000708±0.000011
700	549.1±11.5	38.67	0.34	-11282	2.788e-14	0.34	0.487378±0.001638	0.142006±0.000111	0.002004±0.000030	0.218958±0.000638	0.001062±0.000012
775	544.0±10.7	38.72	0.36	-33539	2.355e-14	0.52	0.411072±0.000543	0.121069±0.000104	0.001737±0.000025	0.175082±0.000460	0.000893±0.000010
850	548.9±13.9	31.7	0.34	-8313	1.795e-14	0.65	0.382708±0.000347	0.091456±0.000086	0.001322±0.000018	0.141528±0.000351	0.000915±0.000010
950	596.5±21.5	23.84	0.21	-8807	1.095e-14	0.73	0.310347±0.000201	0.051363±0.000066	0.000801±0.000021	0.127614±0.000154	0.000827±0.000009
1050	540.3±29.5	16.14	0.16	-274890	8.292e-15	0.8	0.347265±0.000223	0.042971±0.000055	0.000750±0.000025	0.143409±0.000575	0.001016±0.000010
1150	590.6±29.6	13.18	0.13	1356	1.026e-14	0.87	0.526091±0.000208	0.048650±0.000053	0.001083±0.000020	0.195559±0.000211	0.001585±0.000012
1250	628.2±42.6	5.51	0.03	3194	1.553e-14	0.97	1.906305±0.000492	0.070030±0.000057	0.002173±0.000031	1.368328±0.001937	0.006418±0.000022
1400	799.4±88.1	6.54	0.03	-7098	5.359e-15	1	0.553879±0.000292	0.018936±0.000044	0.000569±0.000027	0.300851±0.000853	0.001818±0.000013
Packet IRR350-MB, Experiment #16Z0145, 0.1512 g Basalt, all errors ±1 sigma
J = 0.000229185489114 ± 0.000000354404738	2016-05-26
40Ar* is radiogenic argon, isotopes in volts (1.48e-13 moles/volt), corrected for blank, background, discrimination, and decay
Calculated bulk K/Ca = 0.124 ± 6.501e-2, Calculated K2O = 1.10%wt., Calculated CaO = 10.81%wt., Calculated Cl = -6.6e-4ppm
Total Gas Age = 568.8 ± 7.4 ka
Weighted Mean Plateau Age = 551.1 ± 8.3 ka (±1 sigma, including ±J), 94.8% 39Ar released
Weighted Mean Plateau Age = 551.1 ± 6.0 ka (A priori, including ±J), 94.8% 39Ar released
Weighted Mean Plateau Age = 551.1 ± 20.3 ka (95% confidence, including ±J)
MSWD = 1.93 (Good fit, MSWD < 2.29)
Plateau K/Ca = 0.2672
Plateau K/Cl = -2.9722e+4
% radiogenic (plateau norm.) = 28.3674
Steps 8 of 10 (625,700,775,850,950,1050,1150,1250°C)
Isochron Age = 537.1 ± 9.5 ka (±1 sigma, including ±J)
Isochron Age = 537.1 ± 8.3 ka (A Priori Errors, including ±J)
Isochron Age = 537.1 ± 22.1 ka (95% confidence, including ±J)
MSWD = 1.28 (Good fit, MSWD < 2.40)
40Ar/36Ar intercept = 301.4 ± 1.4 (±1 sigma)
40Ar/36Ar intercept = 301.4 ± 1.2 (A Priori)
40Ar/36Ar intercept = 301.4 ± 3.2 (95% confidence)
Steps 8 of 10 (625,700,775,850,950,1050,1150,1250°C)
-----------------
R15MS003	Fluence monitor = Bodie Hills sanidine @ 9.7970 ± 0.0031 Ma, equivalent to Fish Canyon sanidine @ 28.1053 ± 0.0124 Ma with R(FCs/BHs) of 2.88340 ± 0.00089
Temp(°C)	Age(ka)	%40Ar*	K/Ca	K/Cl	moles 40Ar*	∑%39Ar	40Ar	39Ar	38Ar	37Ar	36Ar
550	275.2±30.8	14.27	0.4	-3615	3.873e-15	0.05	0.183454±0.000359	0.039498±0.000071	0.000572±0.000023	0.051917±0.000444	0.000541±0.000010
625	252.3±13.5	17.7	0.43	-4639	8.717e-15	0.17	0.332912±0.000669	0.096970±0.000108	0.001359±0.000030	0.118644±0.000574	0.000951±0.000010
700	259.2±10.0	19.34	0.44	-4196	1.328e-14	0.35	0.464002±0.000549	0.143749±0.000130	0.001980±0.000022	0.169791±0.000520	0.001301±0.000011
750	248.4±11.1	16.95	0.47	-61405	1.039e-14	0.5	0.414271±0.000275	0.117413±0.000106	0.001753±0.000024	0.132144±0.000566	0.001189±0.000010
800	274.1±11.5	15.34	0.43	-6522	1.05e-14	0.63	0.462724±0.000208	0.107527±0.000101	0.001591±0.000038	0.130257±0.000438	0.001348±0.000010
875	295.1±18.6	13.59	0.29	7619	7.994e-15	0.73	0.397639±0.000199	0.076050±0.000075	0.001260±0.000037	0.138424±0.000580	0.001190±0.000011
975	288.3±24.1	11.11	0.17	13848	5.526e-15	0.79	0.336138±0.000202	0.053863±0.000061	0.000915±0.000031	0.165643±0.000216	0.001047±0.000010
1100	249.5±17.3	7.99	0.21	4718	8.48e-15	0.91	0.716772±0.000347	0.095457±0.000109	0.001759±0.000029	0.236160±0.001388	0.002275±0.000013
1175	400.8±57.5	3.32	0.04	792	4.813e-15	0.95	0.980856±0.000397	0.033967±0.000060	0.001232±0.000036	0.410603±0.001219	0.003292±0.000015
1300	454.4±91.1	1.22	0.02	877	5.84e-15	1	3.232123±0.000947	0.036732±0.000090	0.002681±0.000055	0.973696±0.001099	0.010967±0.000026
Packet IRR351-OL, Experiment #16Z0214, 0.1545 g Basalt, all errors ±1 sigma
J = 0.000230054053898 ± 5.0269E-07	2016-07-23
40Ar* is radiogenic argon, isotopes in volts (1.48e-13 moles/volt), corrected for blank, background, discrimination, and decay
Calculated bulk K/Ca = 0.166 ± 7.523e-2, Calculated K2O = 1.28%wt., Calculated CaO = 9.45%wt., Calculated Cl = 6.0e-2ppm
Total Gas Age = 278.5 ± 6.6 ka
Weighted Mean Plateau Age = 263.978 ± 7.153 ka (±1 sigma, including ±J), 100.000% 39Ar released
Weighted Mean Plateau Age = 263.978 ± 5.000 ka (a priori, including ±J), 100.000% 39Ar released
Weighted Mean Plateau Age = 263.978 ± 16.495 ka (95% confidence, including ±J)
MSWD = 2.05 (Good fit, MSWD < 2.11)
Plateau K/Ca = 0.3446
Plateau K/Cl = -9092.0000
% radiogenic (plateau norm.) = 14.0581
Steps 10 of 10 (550,625,700,750,800,875,975,1100,1175,1300°C)
Isochron Age = 252.2 ± 6.8 ka (±1 sigma, including ±J)
Isochron Age = 252.2 ± 6.3 ka (a priori Errors, including ±J)
Isochron Age = 252.2 ± 16.0 ka (95% confidence, including ±J)
MSWD = 1.15 (Good fit, MSWD < 2.19)
40Ar/36Ar intercept = 300.6 ± 0.7 (±1 sigma)
40Ar/36Ar intercept = 300.6 ± 0.7 (a priori)
40Ar/36Ar intercept = 300.6 ± 1.7 (95% confidence)
Steps 10 of 10 (550,625,700,750,800,875,975,1100,1175,1300°C)
-----------------
R14AC069	Fluence monitor = Bodie Hills sanidine @ 9.635 ± 0.003 Ma, equivalent to Fish Canyon sanidine @ 27.642 ± 0.012 Ma with R(FCs/BHs) of 2.88340 ± 0.00089
Temp(°C)	Age(ka)	%40Ar*	K/Ca	K/Cl	moles 40Ar*	∑%39Ar	40Ar	39Ar	38Ar	37Ar	36Ar
550	144.4±11.2	13.47	0.41	116598	5.299e-15	0.12	0.265914±0.000183	0.099243±0.000108	0.001456±0.000027	0.126731±0.000274	0.000814±0.000009
600	128.5±10.4	12.62	0.49	-28705	5.601e-15	0.25	0.299904±0.000175	0.117900±0.000114	0.001700±0.000030	0.127316±0.000311	0.000922±0.000010
650	129.0±11.3	9.76	0.46	-35466	4.805e-15	0.37	0.332692±0.000227	0.100779±0.000084	0.001505±0.000025	0.115389±0.000180	0.001048±0.000010
700	126.2±15.3	7.77	0.41	-31129	4.361e-15	0.48	0.379192±0.000344	0.093477±0.000136	0.001439±0.000037	0.119800±0.000354	0.001217±0.000012
750	104.6±14.9	6.25	0.39	5544	3.135e-15	0.58	0.338710±0.000255	0.081064±0.000099	0.001331±0.000029	0.108561±0.000525	0.001105±0.000010
825	126.3±14.2	6.33	0.34	-6848	4.622e-15	0.69	0.493646±0.000516	0.099016±0.000095	0.001535±0.000029	0.151410±0.000598	0.001607±0.000012
900	116.8±33.5	3.62	0.31	-1257	2.915e-15	0.77	0.543349±0.002226	0.067523±0.000244	0.000991±0.000034	0.113351±0.000183	0.001804±0.000018
1000	118.9±38.7	2.35	0.27	-1976	2.274e-15	0.83	0.653640±0.001767	0.051744±0.000142	0.000974±0.000037	0.101665±0.000396	0.002188±0.000016
1100	126.4±34.0	1.31	0.13	19754	3.027e-15	0.91	1.562517±0.000404	0.064900±0.000101	0.001848±0.000020	0.259864±0.000422	0.005291±0.000018
1200	311.0±65.7	1.01	0.02	509	7.55e-15	0.99	5.032031±0.002123	0.067019±0.000094	0.004631±0.000050	1.980137±0.001818	0.017412±0.000034
1300	1417.3±264.8	2.17	0.03	469	3.646e-15	0.99	1.135847±0.000465	0.007030±0.000036	0.000862±0.000030	0.111872±0.000572	0.003792±0.000015
1450	1912.4±326.4	2.66	0.04	468	4.086e-15	1	1.039075±0.000407	0.005832±0.000026	0.000771±0.000018	0.085057±0.000683	0.003447±0.000016
Packet IRR336-CY, Experiment #15Z0142, 0.1469 g Basalt, all errors ±1 sigma
J = 0.000221725384573±2.41932E-07
40Ar* is radiogenic argon, isotopes in volts (1.48e-13 moles/volt), corrected for blank, background, discrimination, and decay
Calculated bulk K/Ca = 0.132 ± 7.8719e-2, Calculated K2O = 1.49%wt., Calculated CaO = 13.88%wt., Calculated Cl = 0.1ppm
Total Gas Age = 162.6 ± 8.1 ka
Weighted Mean Plateau Age = 128.1 ± 4.9 ka (±1 sigma, including ±J), 90.8% 39Ar released
Weighted Mean Plateau Age = 128.1 ± 4.9 ka (a priori, including ±J), 90.8% 39Ar released
Weighted Mean Plateau Age = 128.1 ± 8.5 ka (95% confidence, including ±J)
MSWD = 0.60 (Good fit, MSWD < 2.19)
Steps 9 of 12 (550,600,650,700,750,825,900,1000,1100°C)
Isochron Age = 130.5 ± 7.4 ka (±1 sigma, including ±J)
Isochron Age = 130.5 ± 7.4 ka (a priori Errors, including ±J)
Isochron Age = 130.5 ± 16.8 ka (95% confidence, including ±J)
MSWD = 0.65 (Good fit, MSWD < 2.29)
40Ar/36Ar intercept = 295.0 ± 1.1 (±1 sigma)
40Ar/36Ar intercept = 295.0 ± 1.1 (a priori)
40Ar/36Ar intercept = 295.0 ± 2.5 (95% confidence)
Steps 9 of 12 (550,600,650,700,750,825,900,1000,1100°C)
-----------------
R16MS057	Fluence monitor = Bodie Hills sanidine @ 9.7970 ± 0.0031 Ma, equivalent to Fish Canyon sanidine @ 28.1053 ± 0.0124 Ma with R(FCs/BHs) of 2.88340 ± 0.00089
Temp(°C)	Age(ka)	%40Ar*	K/Ca	K/Cl	moles 40Ar*	%39Ar	40Ar	39Ar	38Ar	37Ar	36Ar
550	510.5±84.4	27.46	0.31	-491	1.366e-15	0	0.069944±0.000956	0.014948±0.000210	0.000098±0.000024	0.025266±0.000184	0.000177±0.000010
625	494.9±27.7	30.66	0.31	-965	7.316e-15	0.03	0.335511±0.002927	0.082582±0.000667	0.000867±0.000038	0.139497±0.000746	0.000818±0.000016
700	457.5±14.3	32.91	0.31	-2726	1.404e-14	0.11	0.600014±0.001816	0.171466±0.000421	0.002242±0.000053	0.290989±0.001036	0.001430±0.000020
775	442.1±9.4	37.3	0.35	-4777	1.611e-14	0.23	0.607167±0.000767	0.203498±0.000262	0.002737±0.000041	0.306084±0.000799	0.001361±0.000016
850	444.0±9.9	34.69	0.37	-6356	1.624e-14	0.39	0.658065±0.000419	0.204235±0.000168	0.002822±0.000042	0.288679±0.000817	0.001520±0.000017
925	413.3±23.7	24.24	0.26	-8631	9.935e-15	0.52	0.576091±0.000678	0.134291±0.000294	0.001977±0.000058	0.265712±0.001155	0.001536±0.000027
1025	451.4±33.2	14.64	0.17	-23111	5.315e-15	0.59	0.510245±0.000659	0.065842±0.000172	0.001130±0.000034	0.205417±0.001057	0.001516±0.000018
1125	410.6±31.8	11.32	0.15	4124	4.418e-15	0.66	0.548534±0.000347	0.060175±0.000099	0.001163±0.000029	0.204802±0.000684	0.001687±0.000016
1200	371.0±33.6	6.5	0.05	973	4.788e-15	0.77	1.035484±0.000517	0.072529±0.000108	0.001894±0.000030	0.742741±0.001971	0.003451±0.000020
1275	478.4±30.6	6.93	0.03	3180	1.108e-14	0.97	2.247129±0.000958	0.130535±0.000175	0.003245±0.000047	1.947500±0.003632	0.007552±0.000031
1375	668.8±85.9	12.21	0.05	228133	2.354e-15	1	0.270874±0.000283	0.019793±0.000081	0.000415±0.000026	0.225260±0.000733	0.000860±0.000014
Packet IRR359-VH, Experiment #17Z0085, 0.1477 g Basalt, all errors ±1 sigma
J = 0.000220063135 ± 2.75E-07	2017-03-26
40Ar* is radiogenic argon, isotopes in volts (11.00 moles/volt), corrected for blank, background, discrimination, and decay
Calculated bulk K/Ca = 0.131 ± 6.224e-2, Calculated K2O = 7.61e+13%wt., Calculated CaO = 7.13e+14%wt., Calculated Cl = -1.1e+13ppm
Total Gas Age = 448.4 ± 6.8 ka
Weighted Mean Plateau Age = 444.4 ± 6.8 ka (±1 sigma, including ±J), 96.6% 39Ar released
Weighted Mean Plateau Age = 444.4 ± 5.5 ka (A priori, including ±J), 96.6% 39Ar released
Weighted Mean Plateau Age = 444.4 ± 15.7 ka (95% confidence, including ±J)
MSWD = 1.53 (Good fit, MSWD < 2.11)
Plateau K/Ca = 0.212
Plateau K/Cl = -3669
% radiogenic (plateau norm.) = 21.4
Steps 10 of 11 (550,625,700,775,850,925,1025,1125,1200,1275°C)
Isochron Age = 447.4 ± 10.0 ka (±1 sigma, including ±J)
Isochron Age = 447.4 ± 7.7 ka (A Priori Errors, including ±J)
Isochron Age = 447.4 ± 22.9 ka (95% confidence, including ±J)
MSWD = 1.66 (Good fit, MSWD < 2.19)
40Ar/36Ar intercept = 297.7 ± 1.6 (±1 sigma)
40Ar/36Ar intercept = 297.7 ± 1.3 (A Priori)
40Ar/36Ar intercept = 297.7 ± 3.8 (95% confidence)
Steps 10 of 11 (550,625,700,775,850,925,1025,1125,1200,1275°C)
-----------------
R16MS089	Fluence monitor = Bodie Hills sanidine @ 9.7970 ± 0.0031 Ma, equivalent to Fish Canyon sanidine @ 28.1053 ± 0.0124 Ma with R(FCs/BHs) of 2.88340 ± 0.00089
Temp(°C)	Age(ka)	%40Ar*	K/Ca	K/Cl	moles 40Ar*	%39Ar	40Ar	39Ar	38Ar	37Ar	36Ar
625	449.7±45.3	24.77	0.38	-3154	2.919e-15	0.04	0.079651±0.000108	0.018729±0.000044	0.000259±0.000015	0.025860±0.000252	0.000208±0.000007
700	501.6±26.2	18.3	0.29	-1197	7.715e-15	0.14	0.284842±0.000647	0.044384±0.000055	0.000572±0.000018	0.078967±0.000926	0.000801±0.000009
0	468.8±29.6	16.38	0.25	-768	7.106e-15	0.23	0.293201±0.001185	0.043757±0.000078	0.000486±0.000060	0.092053±0.000334	0.000847±0.000009
850	488.9±39.1	18.09	0.33	-888	5.427e-15	0.3	0.202702±0.000662	0.032027±0.000055	0.000371±0.000049	0.050767±0.000341	0.000570±0.000010
925	510.4±38.4	17.41	0.29	-1557	4.905e-15	0.37	0.190377±0.000527	0.027733±0.000053	0.000388±0.000025	0.050929±0.000572	0.000541±0.000008
1025	439.8±37.5	15.08	0.22	-1708	5.277e-15	0.44	0.236445±0.000456	0.034634±0.000062	0.000496±0.000018	0.080716±0.000369	0.000695±0.000010
1125	434.8±20.5	13.02	0.22	-7532	9.218e-15	0.58	0.478443±0.000214	0.061213±0.000077	0.001034±0.000030	0.148643±0.000677	0.001435±0.000010
1200	482.7±19.5	6.91	0.06	3333	2.403e-14	0.89	2.351195±0.000879	0.144422±0.000112	0.003485±0.000033	1.362133±0.003580	0.007714±0.000020
1275	505.0±44.6	5.96	0.05	11059	7.52e-15	0.99	0.853028±0.000324	0.043257±0.000058	0.001099±0.000031	0.476243±0.001351	0.002821±0.000015
1375	362.4±169.5	3.67	0.03	-1009	8.458e-16	1	0.155732±0.000253	0.006821±0.000028	0.000158±0.000012	0.133296±0.000573	0.000540±0.000009
Packet IRR356-SL, Experiment #16Z0314, 0.1478 g Basalt, all errors ±1 sigma
J = 0.000236458 ± 2.89E-07	2016-11-18
40Ar* is radiogenic argon, isotopes in volts (1.48e-13 moles/volt), corrected for blank, background, discrimination, and decay
Calculated bulk K/Ca = 9.555e-2 ± 5.623e-2, Calculated K2O = 0.74%wt., Calculated CaO = 9.51%wt., Calculated Cl = -0.3ppm
Total Gas Age = 474.6 ± 10.3 ka
Weighted Mean Plateau Age = 471.6 ± 9.7 ka (±1 sigma, including ±J), 100.0% 39Ar released
Weighted Mean Plateau Age = 471.6 ± 9.7 ka (A priori, including ±J), 100.0% 39Ar released
Weighted Mean Plateau Age = 471.6 ± 21.1 ka (95% confidence, including ±J)
MSWD = 0.89 (Good fit, MSWD < 2.11)
Plateau K/Ca = 0.177
Plateau K/Cl = 460
% radiogenic (plateau norm.) = 12.4
Steps 10 of 10 (625,700,0,850,925,1025,1125,1200,1275,1375°C)
Isochron Age = 457.3 ± 20.4 ka (±1 sigma, including ±J)
Isochron Age = 457.3 ± 20.4 ka (A Priori Errors, including ±J)
Isochron Age = 457.3 ± 48.2 ka (95% confidence, including ±J)
MSWD = 0.93 (Good fit, MSWD < 2.19)
40Ar/36Ar intercept = 299.6 ± 1.4 (±1 sigma)
40Ar/36Ar intercept = 299.6 ± 1.4 (A Priori)
40Ar/36Ar intercept = 299.6 ± 3.4 (95% confidence)
Steps 10 of 10 (625,700,0,850,925,1025,1125,1200,1275,1375°C)
-----------------
R14TS084	Fluence monitor = Bodie Hills sanidine @ 9.635 ± 0.003 Ma, equivalent to Fish Canyon sanidine @ 27.642 ± 0.012 Ma with R(FCs/BHs) of 2.88340 ± 0.00089
Temp(°C)	Age(ka)	%40Ar*	K/Ca	K/Cl	moles 40Ar*	∑%39Ar	40Ar	39Ar	38Ar	37Ar	36Ar
550	683.5±38.6	12.41	0.33	-26671	8.458e-15	0.04	0.460536±0.000203	0.033384±0.000054	0.000690±0.000024	0.053060±0.000486	0.001380±0.000011
625	674.8±29.5	15.09	0.32	-3765	1.254e-14	0.11	0.561177±0.000292	0.050115±0.000083	0.000905±0.000032	0.080981±0.000495	0.001635±0.000012
700	630.8±26.1	11.83	0.26	6707	1.573e-14	0.2	0.898523±0.000316	0.067297±0.000079	0.001432±0.000030	0.135851±0.000740	0.002719±0.000015
775	666.5±26.8	14.27	0.29	97718	1.581e-14	0.28	0.748675±0.000317	0.064015±0.000077	0.001253±0.000036	0.117310±0.000763	0.002205±0.000014
850	659.9±29.5	17.39	0.38	6490	1.33e-14	0.35	0.516890±0.000262	0.054372±0.000073	0.001022±0.000021	0.075398±0.000699	0.001466±0.000014
950	665.0±27.2	15.64	0.34	19641	1.354e-14	0.43	0.585095±0.000283	0.054938±0.000081	0.001048±0.000024	0.085253±0.000859	0.001694±0.000013
1050	654.1±19.3	16.11	0.31	33517	2.197e-14	0.55	0.921127±0.000305	0.090622±0.000099	0.001695±0.000016	0.154425±0.000931	0.002658±0.000015
1125	688.5±13.7	15.5	0.27	7995	3.257e-14	0.72	1.420160±0.000378	0.127657±0.000096	0.002511±0.000037	0.245663±0.000823	0.004130±0.000015
1175	637.0±16.2	13.96	0.17	3314	2.59e-14	0.86	1.253786±0.000411	0.109819±0.000087	0.002275±0.000033	0.343409±0.000828	0.003747±0.000015
1275	676.9±31.9	6.28	0.04	3300	2.548e-14	0.99	2.739026±0.000876	0.102411±0.000099	0.003134±0.000023	1.402046±0.002873	0.009080±0.000026
1400	1074.0±256.2	4.34	0.01	4167	1.899e-15	1	0.295690±0.000191	0.004896±0.000044	0.000253±0.000016	0.187595±0.000979	0.001010±0.000010
Packet IRR346-LG, Experiment #16Z0093, 0.1497 g Basalt, all errors ±1 sigma
J = 0.000221107527377 ± 2.972484E-07
40Ar* is radiogenic argon, isotopes in volts (1.48e-13 moles/volt), corrected for blank, background, discrimination, and decay
Calculated bulk K/Ca = 0.138 ± 7.223e-2, Calculated K2O = 1.30%wt., Calculated CaO = 11.57%wt., Calculated Cl = 0.2ppm
Total Gas Age = 665.9 ± 7.8 ka
Weighted Mean Plateau Age = 663.5 ± 7.1 ka (±1 sigma, including ±J), 99.4% 39Ar released
Weighted Mean Plateau Age = 663.5 ± 7.1 ka (a priori, including ±J), 99.4% 39Ar released
Weighted Mean Plateau Age = 663.5 ± 15.9 ka (95% confidence, including ±J)
MSWD = 0.94 (Good fit, MSWD < 2.11)
Plateau K/Ca = 0.2481
Plateau K/Cl = 1.5678e+4
% radiogenic (plateau norm.) = 13.6575
Steps 10 of 11 (550,625,700,775,850,950,1050,1125,1175,1275°C)
Isochron Age = 657.3 ± 22.4 ka (±1 sigma, including ±J)
Isochron Age = 657.3 ± 21.9 ka (a priori Errors, including ±J)
Isochron Age = 657.3 ± 51.7 ka (95% confidence, including ±J)
MSWD = 1.05 (Good fit, MSWD < 2.19)
40Ar/36Ar intercept = 295.9 ± 1.5 (±1 sigma)
40Ar/36Ar intercept = 295.9 ± 1.5 (a priori)
40Ar/36Ar intercept = 295.9 ± 3.5 (95% confidence)
Steps 10 of 11 (550,625,700,775,850,950,1050,1125,1175,1275°C)
-----------------
R16DD216	Fluence monitor = Bodie Hills sanidine @ 9.7970 ± 0.0031 Ma, equivalent to Fish Canyon sanidine @ 28.1053 ± 0.0124 Ma with R(FCs/BHs) of 2.88340 ± 0.00089
Temp(°C)	Age(ka)	%40Ar*	K/Ca	K/Cl	moles 40Ar*	%39Ar	40Ar	39Ar	38Ar	37Ar	36Ar
550	255.7±58.8	27.84	0.33	6944	1.315e-15	0.03	0.066420±0.000319	0.028948±0.000066	0.000429±0.000043	0.045821±0.000308	0.000173±0.000014
625	207.2±25.7	15.29	0.34	4856	2.529e-15	0.09	0.232542±0.000379	0.068688±0.000113	0.001089±0.000040	0.107281±0.000821	0.000690±0.000015
700	223.2±26.8	9.01	0.26	10047	3.104e-15	0.16	0.484469±0.000448	0.078278±0.000128	0.001342±0.000066	0.155582±0.000651	0.001520±0.000017
775	208.4±31.2	7.02	0.24	9824	2.549e-15	0.22	0.510200±0.000327	0.068861±0.000118	0.001235±0.000049	0.148336±0.000741	0.001630±0.000018
850	211.2±27.5	9.22	0.32	-4272	2.718e-15	0.28	0.414240±0.000293	0.072407±0.000138	0.001117±0.000055	0.117595±0.000518	0.001292±0.000017
925	215.0±29.1	8.62	0.3	-6557	2.758e-15	0.35	0.449895±0.000312	0.072213±0.000125	0.001162±0.000064	0.127406±0.000556	0.001413±0.000018
1025	233.8±22.9	10.16	0.23	-15222	4.076e-15	0.44	0.564161±0.000353	0.098139±0.000156	0.001584±0.000057	0.220334±0.000663	0.001759±0.000019
1125	230.7±14.1	9.71	0.22	-25659	8.454e-15	0.62	1.223441±0.000487	0.206310±0.000203	0.003379±0.000084	0.480827±0.000804	0.003834±0.000024
1175	281.5±14.3	9.59	0.11	3278	1.157e-14	0.83	1.696893±0.000631	0.231931±0.000189	0.004336±0.000030	1.064231±0.000637	0.005437±0.000027
1225	293.6±27.0	5.69	0.06	4625	7.846e-15	0.97	1.938817±0.000919	0.151214±0.000189	0.003305±0.000039	1.417695±0.002517	0.006522±0.000033
1325	485.1±66.2	5.78	0.05	-4303	3.313e-15	1	0.805912±0.000423	0.038703±0.000072	0.000956±0.000034	0.430394±0.001725	0.002664±0.000021
Packet IRR357-SR, Experiment #16Z0323, 0.131 g Basalt, all errors ±1 sigma
J = 0.000221715491 ± 0.000000259885	2016-11-30
40Ar* is radiogenic argon, isotopes in volts (7.12e-14 moles/volt), corrected for blank, background, discrimination, and decay
Calculated bulk K/Ca = 0.135 ± 6.063e-2, Calculated K2O = 1.05%wt., Calculated CaO = 9.50%wt., Calculated Cl = 9.0e-2ppm
Total Gas Age = 253.8 ± 7.4 ka
Weighted Mean Plateau Age = 223.4 ± 8.6 ka (±1 sigma, including ±J), 62.3% 39Ar released
Weighted Mean Plateau Age = 223.4 ± 8.6 ka (A priori, including ±J), 62.3% 39Ar released
Weighted Mean Plateau Age = 223.4 ± 10.3 ka (95% confidence, including ±J)
MSWD = 0.24 (Good fit, MSWD < 2.29)
Plateau K/Ca = 0.265
Plateau K/Cl = -8030
% radiogenic (plateau norm.) = 10.6
Steps 8 of 11 (550,625,700,775,850,925,1025,1125°C)
Isochron Age = 220.4 ± 42.4 ka (±1 sigma, including ±J)
Isochron Age = 220.4 ± 42.4 ka (A Priori Errors, including ±J)
Isochron Age = 220.4 ± 97.8 ka (95% confidence, including ±J)
MSWD = 0.28 (Good fit, MSWD < 2.40)
40Ar/36Ar intercept = 299.0 ± 6.0 (±1 sigma)
40Ar/36Ar intercept = 299.0 ± 6.0 (A Priori)
40Ar/36Ar intercept = 299.0 ± 13.9 (95% confidence)
Steps 8 of 11 (550,625,700,775,850,925,1025,1125°C)
-----------------
R14AC018	Fluence monitor = Bodie Hills sanidine @ 9.635 ± 0.003 Ma, equivalent to Fish Canyon sanidine @ 27.642 ± 0.012 Ma with R(FCs/BHs) of 2.88340 ± 0.00089
Temp(°C)	Age(ka)	%40Ar*	K/Ca	K/Cl	moles 40Ar*	∑%39Ar	40Ar	39Ar	38Ar	37Ar	36Ar
550	632.1±106.1	5.84	0.22	308	6.851e-15	0.04	0.792092±0.000518	0.029431±0.000081	0.001269±0.000084	0.068900±0.000661	0.002543±0.000026
625	758.5±42.9	11.15	0.23	315	2.153e-14	0.14	1.304951±0.001058	0.077068±0.000097	0.002799±0.000207	0.172001±0.000125	0.003972±0.000028
700	715.5±25.2	14.51	0.31	298	3.215e-14	0.29	1.497753±0.000793	0.121965±0.000161	0.004171±0.000347	0.206535±0.000514	0.004391±0.000026
750	711.8±31.0	16.19	0.46	315	1.927e-14	0.38	0.804245±0.000568	0.073462±0.000141	0.002393±0.000184	0.083894±0.000232	0.002304±0.000019
800	705.6±31.6	13.81	0.49	296	1.592e-14	0.46	0.778884±0.000457	0.061219±0.000128	0.002117±0.000149	0.065967±0.000621	0.002290±0.000016
850	699.8±48.2	11.42	0.41	377	1.212e-14	0.52	0.717139±0.000522	0.046987±0.000138	0.001555±0.000136	0.059571±0.000734	0.002166±0.000019
900	655.9±64.3	7.46	0.34	255	1.002e-14	0.57	0.907933±0.000554	0.041468±0.000114	0.001776±0.000162	0.063358±0.000429	0.002861±0.000022
975	717.6±84.7	5.35	0.31	347	1.068e-14	0.62	1.348740±0.000797	0.040392±0.000118	0.001839±0.000104	0.069116±0.000673	0.004339±0.000029
1000	657.4±60.4	4.4	0.29	415	8.516e-15	0.67	1.309183±0.000428	0.035165±0.000096	0.001618±0.000084	0.064030±0.000512	0.004254±0.000018
1100	674.5±28.6	3.73	0.3	1307	4.098e-14	0.88	7.367951±0.002373	0.163696±0.000218	0.007182±0.000080	0.281707±0.001015	0.024082±0.000039
1150	744.9±49.1	2.94	0.22	678	2.472e-14	0.99	5.675394±0.001727	0.090096±0.000190	0.005243±0.000080	0.213752±0.000403	0.018701±0.000037
1250	1055.1±263.9	4.03	0.06	464	2.029e-15	1	0.339808±0.000397	0.005243±0.000024	0.000324±0.000016	0.042515±0.000348	0.001115±0.000012
Packet IRR332-YV, Experiment #15Z0010, 0.1824 g Basalt, all errors ±1 sigma
J = 0.0002224325466±4.5938E-07
40Ar* is radiogenic argon, isotopes in volts (1.48e-13 moles/volt), corrected for blank, background, discrimination, and decay
Calculated bulk K/Ca = 0.296 ± 0.102, Calculated K2O = 1.10%wt., Calculated CaO = 4.57%wt., Calculated Cl = 3.1ppm
Total Gas Age = 706.0 ± 12.9 ka
Weighted Mean Plateau Age = 705.8 ± 12.0 ka (±1 sigma, including ±J), 100.0% 39Ar released
Weighted Mean Plateau Age = 705.8 ± 12.0 ka (a priori, including ±J), 100.0% 39Ar released
Weighted Mean Plateau Age = 705.8 ± 21.5 ka (95% confidence, including ±J)
MSWD = 0.64 (Good fit, MSWD < 1.99)
Steps 12 of 12 (550,625,700,750,800,850,900,975,1000,1100,1150,1250°C)
Isochron Age = 712.3 ± 20.0 ka (±1 sigma, including ±J)
Isochron Age = 712.3 ± 20.0 ka (a priori Errors, including ±J)
Isochron Age = 712.3 ± 45.2 ka (95% confidence, including ±J)
MSWD = 0.68 (Good fit, MSWD < 2.05)
40Ar/36Ar intercept = 295.3 ± 0.5 (±1 sigma)
40Ar/36Ar intercept = 295.3 ± 0.5 (a priori)
40Ar/36Ar intercept = 295.3 ± 1.2 (95% confidence)
Steps 12 of 12 (550,625,700,750,800,850,900,975,1000,1100,1150,1250°C)R14AC18 Basalt
-----------------
R14AC65	Fluence monitor = Bodie Hills sanidine @ 9.635 ± 0.003 Ma, equivalent to Fish Canyon sanidine @ 27.642 ± 0.012 Ma with R(FCs/BHs) of 2.88340 ± 0.00089
Temp(°C)	Age(ka)	%40Ar*	K/Ca	K/Cl	moles 40Ar*	%39Ar	40Ar	39Ar	38Ar	37Ar	36Ar
550	336.4±20.1	26.11	0.36	-5889	6.472e-15	0.08	0.167483±0.000333	0.051893±0.000082	0.000724±0.000022	0.076127±0.000565	0.000440±0.000009
625	310.0±12.6	35.74	0.43	-7867	9.803e-15	0.2	0.185301±0.000204	0.085260±0.000101	0.001152±0.000024	0.104420±0.000486	0.000432±0.000009
700	310.4±8.5	31.25	0.48	-12746	1.498e-14	0.39	0.323848±0.000145	0.130094±0.000101	0.001810±0.000038	0.141088±0.000871	0.000793±0.000009
775	290.9±11.5	23.68	0.44	-12898	9.401e-15	0.51	0.268213±0.000153	0.087137±0.000081	0.001248±0.000032	0.103219±0.000667	0.000721±0.000008
850	299.4±13.1	20.43	0.32	64018	9.045e-15	0.63	0.299179±0.000187	0.081486±0.000072	0.001230±0.000019	0.132783±0.000800	0.000843±0.000009
925	366.0±19.2	17.48	0.19	-15440	7.349e-15	0.71	0.284061±0.000188	0.054198±0.000066	0.000849±0.000020	0.150712±0.000665	0.000835±0.000009
1025	345.9±26.4	12.77	0.15	5351	4.8e-15	0.76	0.253967±0.000141	0.037477±0.000062	0.000666±0.000029	0.133817±0.000662	0.000787±0.000008
1125	332.0±21.7	10.95	0.16	3179	7.603e-15	0.85	0.469026±0.000229	0.061832±0.000085	0.001165±0.000020	0.205276±0.000883	0.001471±0.000011
1200	345.6±71.6	4.56	0.04	877	4.353e-15	0.9	0.644948±0.000313	0.034280±0.000093	0.001018±0.000034	0.494231±0.001779	0.002222±0.000020
1300	1430.2±36.0	16	0.03	1877	3.204e-14	0.99	1.352740±0.000390	0.061104±0.000074	0.001686±0.000023	1.096431±0.002038	0.004153±0.000017
1400	2269.4±138.8	23.59	0.04	825	5.283e-15	1	0.151346±0.000147	0.006335±0.000031	0.000191±0.000014	0.093291±0.000491	0.000418±0.000007
Packet IRR346-KY, Experiment #16Z0092, 0.1475 g Basalt, all errors ±1 sigma
J = 0.000221029127955 ± 3.773650E-07
40Ar* is radiogenic argon, isotopes in volts (1.48e-13 moles/volt), corrected for blank, background, discrimination, and decay
Calculated bulk K/Ca = 0.132 ± 6.160e-2, Calculated K2O = 1.20%wt., Calculated CaO = 11.14%wt., Calculated Cl = 0.1ppm
Total Gas Age = 434.4 ± 6.5 ka
Weighted Mean Plateau Age = 312.8 ± 7.0 ka (±1 sigma, including ±J), 90.3% 39Ar released
Weighted Mean Plateau Age = 312.8 ± 4.9 ka (A priori, including ±J), 90.3% 39Ar released
Weighted Mean Plateau Age = 312.8 ± 16.5 ka (95% confidence, including ±J)
MSWD = 2.05 (Good fit, MSWD < 2.19)
Plateau K/Ca = 0.3360
Plateau K/Cl = 1680.0000
% radiogenic (plateau norm.) = 23.1911
Steps 9 of 11 (550,625,700,775,850,925,1025,1125,1200°C)
Isochron Age = 297.0 ± 11.5 ka (±1 sigma, including ±J)
Isochron Age = 297.0 ± 8.9 ka (A Priori Errors, including ±J)
Isochron Age = 297.0 ± 26.6 ka (95% confidence, including ±J)
MSWD = 1.68 (Good fit, MSWD < 2.29)
40Ar/36Ar intercept = 299.8 ± 2.7 (±1 sigma)
40Ar/36Ar intercept = 299.8 ± 2.1 (A Priori)
40Ar/36Ar intercept = 299.8 ± 6.3 (95% confidence)
Steps 9 of 11 (550,625,700,775,850,925,1025,1125,1200°C)
-----------------
R14AC66	Fluence monitor = Bodie Hills sanidine @ 9.635 ± 0.003 Ma, equivalent to Fish Canyon sanidine @ 27.642 ± 0.012 Ma with R(FCs/BHs) of 2.88340 ± 0.00089
Temp(°C)	Age(ka)	%40Ar*	K/Ca	K/Cl	moles 40Ar*	%39Ar	40Ar	39Ar	38Ar	37Ar	36Ar
550	359.2±15.3	22.17	0.35	6684	1.01e-14	0.1	0.307714±0.000196	0.076014±0.000071	0.001202±0.000019	0.115411±0.000513	0.000843±0.000010
600	276.6±13.2	20.29	0.41	13487	8.482e-15	0.2	0.282466±0.000208	0.082889±0.000097	0.001260±0.000026	0.105020±0.000346	0.000791±0.000009
650	305.2±11.9	17.76	0.45	6345	1.194e-14	0.34	0.454288±0.000209	0.105749±0.000099	0.001700±0.000028	0.123907±0.000273	0.001299±0.000011
700	302.7±16.4	15.16	0.45	-12340	7.543e-15	0.43	0.336222±0.000163	0.067339±0.000086	0.001044±0.000017	0.078946±0.000435	0.000987±0.000009
775	299.7±15.6	12.87	0.38	60499	8.647e-15	0.53	0.453995±0.000244	0.077994±0.000101	0.001283±0.000031	0.107338±0.000609	0.001369±0.000010
850	302.6±19.0	12.23	0.31	28327	8.032e-15	0.62	0.443766±0.000227	0.071764±0.000082	0.001203±0.000023	0.120053±0.000393	0.001352±0.000011
925	293.4±25.5	8.52	0.28	-182643	5.026e-15	0.68	0.398588±0.000217	0.046331±0.000080	0.000840±0.000019	0.087810±0.000357	0.001258±0.000010
1025	242.7±28.4	5.45	0.25	3768	4.574e-15	0.74	0.567293±0.000245	0.050980±0.000083	0.001070±0.000032	0.107895±0.000124	0.001845±0.000012
1125	310.3±22.2	5.29	0.16	2191	9.417e-15	0.85	1.201979±0.000399	0.082150±0.000092	0.001966±0.000035	0.262134±0.001096	0.003926±0.000015
1200	585.2±42.4	4.2	0.03	754	1.628e-14	0.94	2.618138±0.000883	0.076255±0.000102	0.003053±0.000047	1.567661±0.003729	0.008928±0.000025
1300	3434.8±63.2	17.5	0.04	1581	4.749e-14	0.99	1.833934±0.000593	0.037699±0.000063	0.001567±0.000018	0.555642±0.001089	0.005276±0.000019
1450	2338.1±197.7	8.87	0.03	755	6.278e-15	1	0.478013±0.000201	0.007326±0.000034	0.000416±0.000021	0.110869±0.000311	0.001505±0.000012
Packet IRR336-CR, Experiment #15Z0164, 0.1487 g Trachy Andesite, all errors ±1 sigma
J = 0.000221562752202±3.17509E-07
40Ar* is radiogenic argon, isotopes in volts (1.48e-13 moles/volt), corrected for blank, background, discrimination, and decay
Calculated bulk K/Ca = 0.123 ± 0.063, Calculated K2O = 1.35%wt., Calculated CaO = 13.49%wt., Calculated Cl = 0.4ppm
Total Gas Age = 497.8 ± 7.3 ka
Weighted Mean Plateau Age = 295.0 ± 6.0 ka (±1 sigma, including ±J), 74.9% 39Ar released
Weighted Mean Plateau Age = 295.0 ± 6.0 ka (A priori, including ±J), 74.9% 39Ar released
Weighted Mean Plateau Age = 295.0 ± 13.3 ka (95% confidence, including ±J)
MSWD = 1.00 (Good fit, MSWD < 2.29)
Steps 8 of 12 (600,650,700,775,850,925,1025,1125°C)
Isochron Age = 293.5 ± 12.8 ka (±1 sigma, including ±J)
Isochron Age = 293.5 ± 11.8 ka (A Priori Errors, including ±J)
Isochron Age = 293.5 ± 29.0 ka (95% confidence, including ±J)
MSWD = 1.19 (Good fit, MSWD < 2.40)
40Ar/36Ar intercept = 295.7 ± 1.6 (±1 sigma)
40Ar/36Ar intercept = 295.7 ± 1.5 (A Priori)
40Ar/36Ar intercept = 295.7 ± 3.6 (95% confidence)
Steps 8 of 12 (600,650,700,775,850,925,1025,1125°C)
-----------------
R14TS130	Fluence monitor = Bodie Hills sanidine @ 9.635 ± 0.003 Ma, equivalent to Fish Canyon sanidine @ 27.642 ± 0.012 Ma with R(FCs/BHs) of 2.88340 ± 0.00089
Temp(°C)	Age(ka)	%40Ar*	K/Ca	K/Cl	moles 40Ar*	∑%39Ar	40Ar	39Ar	38Ar	37Ar	36Ar
550	586.7±205.7	2.87	0.04	-110	1.587e-15	0.02	0.373664±0.000369	0.007433±0.000073	0.000042±0.000026	0.093395±0.000512	0.001254±0.000013
625	259.5±45.9	3.95	0.09	-673	3.29e-15	0.12	0.563043±0.000426	0.034676±0.000076	0.000582±0.000017	0.203516±0.000521	0.001887±0.000013
700	205.2±35.5	4.21	0.11	-1473	3.452e-15	0.26	0.553503±0.000376	0.045978±0.000069	0.000811±0.000022	0.220668±0.001346	0.001856±0.000014
775	213.0±34.2	5.23	0.15	-4538	3.452e-15	0.38	0.445628±0.000254	0.044242±0.000065	0.000810±0.000025	0.154923±0.000345	0.001473±0.000013
850	201.4±41.0	4.13	0.16	-2641	2.401e-15	0.48	0.392471±0.000237	0.032552±0.000059	0.000615±0.000012	0.107558±0.000513	0.001303±0.000011
950	178.7±52.4	3.58	0.11	-10655	1.702e-15	0.56	0.320882±0.000218	0.026031±0.000067	0.000530±0.000024	0.120757±0.000625	0.001081±0.000011
1050	152.6±58.2	2.06	0.09	17868	1.504e-15	0.63	0.494062±0.000283	0.026958±0.000056	0.000670±0.000021	0.149193±0.000375	0.001679±0.000013
1125	158.0±54.6	1.59	0.1	2938	1.865e-15	0.73	0.793436±0.000381	0.032260±0.000054	0.000969±0.000023	0.161847±0.000700	0.002688±0.000015
1200	335.8±66.2	1.7	0.03	714	4.446e-15	0.83	1.770612±0.000637	0.036498±0.000064	0.001812±0.000023	0.622914±0.002563	0.006065±0.000020
1300	314.4±58.5	1.79	0.02	2888	6.361e-15	0.99	2.406854±0.000772	0.056171±0.000063	0.002351±0.000032	1.489826±0.001756	0.008418±0.000025
1400	1526.3±544.1	5.95	0.01	-194	1.289e-15	1	0.146489±0.000179	0.002368±0.000036	0.000070±0.000020	0.095350±0.000854	0.000493±0.000010
Packet IRR341-GX, Experiment #15Z0285, 0.1534 g Basalt, all errors ±1 sigma
J = 0.000223457093298 ± 5.2299E-07
40Ar* is radiogenic argon, isotopes in volts (1.48e-13 moles/volt), corrected for blank, background, discrimination, and decay
Calculated bulk K/Ca = 5.258e-2 ± 2.588e-2, Calculated K2O = 0.57%wt., Calculated CaO = 13.27%wt., Calculated Cl = -0.2ppm
Total Gas Age = 249.1 ± 17.1 ka
Weighted Mean Plateau Age = 219.3 ± 18.6 ka (±1 sigma, including ±J), 99.3% 39Ar released
Weighted Mean Plateau Age = 219.3 ± 15.3 ka (a priori, including ±J), 99.3% 39Ar released
Weighted Mean Plateau Age = 219.3 ± 42.9 ka (95% confidence, including ±J)
MSWD = 1.47 (Good fit, MSWD < 2.11)
Plateau K/Ca = 9.1318e-2
Plateau K/Cl = 309.0000
% radiogenic (plateau norm.) = 3.1566
Steps 10 of 11 (550,625,700,775,850,950,1050,1125,1200,1300°C)
Isochron Age = 160.2 ± 28.2 ka (±1 sigma, including ±J)
Isochron Age = 160.2 ± 28.2 ka (a priori Errors, including ±J)
Isochron Age = 160.2 ± 65.0 ka (95% confidence, including ±J)
MSWD = 0.86 (Good fit, MSWD < 2.19)
40Ar/36Ar intercept = 298.0 ± 1.0 (±1 sigma)
40Ar/36Ar intercept = 298.0 ± 1.0 (a priori)
40Ar/36Ar intercept = 298.0 ± 2.3 (95% confidence)
Steps 10 of 11 (550,625,700,775,850,950,1050,1125,1200,1300°C)
-----------------
R15TS193	Fluence monitor = Bodie Hills sanidine @ 9.7970 ± 0.0031 Ma, equivalent to Fish Canyon sanidine @ 28.1053 ± 0.0124 Ma with R(FCs/BHs) of 2.88340 ± 0.00089
Temp(°C)	Age(ka)	%40Ar*	K/Ca	K/Cl	moles 40Ar*	%39Ar	40Ar	39Ar	38Ar	37Ar	36Ar
550	324.2±152.7	9.78	0.3	-1341	6.509e-16	0.01	0.044993±0.000068	0.005519±0.000023	0.000081±0.000020	0.009551±0.000184	0.000139±0.000007
625	271.2±37.6	12.01	0.25	-1592	3.137e-15	0.07	0.176497±0.000144	0.031805±0.000059	0.000431±0.000015	0.065634±0.000355	0.000539±0.000010
700	260.2±22.1	11.29	0.26	-745	7.333e-15	0.21	0.438982±0.000398	0.077500±0.000104	0.000820±0.000084	0.156541±0.000808	0.001348±0.000014
750	311.5±25.6	15.06	0.3	-1115	5.533e-15	0.3	0.248286±0.000285	0.048823±0.000063	0.000588±0.000039	0.085814±0.000107	0.000730±0.000010
800	274.3±19.9	12.97	0.3	-1833	6.697e-15	0.43	0.348888±0.000306	0.067131±0.000071	0.000918±0.000056	0.118430±0.000308	0.001050±0.000011
850	248.9±24.2	10.07	0.24	-2478	4.829e-15	0.53	0.324173±0.000263	0.053360±0.000070	0.000794±0.000058	0.114116±0.000431	0.001008±0.000011
925	314.2±33.6	12.01	0.18	-1463	5.131e-15	0.61	0.288707±0.000292	0.044928±0.000063	0.000621±0.000056	0.133172±0.000463	0.000888±0.000012
1000	331.0±39.7	11.03	0.15	-1199	4.657e-15	0.68	0.283211±0.000393	0.038438±0.000066	0.000529±0.000048	0.132493±0.000275	0.000881±0.000012
1075	288.7±37.0	9.95	0.13	-5148	4.044e-15	0.76	0.274727±0.000243	0.038565±0.000045	0.000633±0.000034	0.149745±0.000596	0.000871±0.000012
1150	345.4±38.2	6.42	0.11	4884	5.611e-15	0.84	0.590803±0.000296	0.044756±0.000062	0.000978±0.000028	0.209654±0.000557	0.001911±0.000014
1200	423.0±48.0	4.74	0.04	-16601	6.864e-15	0.92	0.977853±0.000308	0.044980±0.000075	0.001177±0.000024	0.602782±0.001706	0.003289±0.000017
1250	421.4±53.1	3.94	0.03	-1619	5.091e-15	0.98	0.873849±0.000292	0.033648±0.000070	0.000896±0.000021	0.680026±0.000840	0.003003±0.000014
1350	788.6±148.0	6.49	0.02	-2047	2.552e-15	1	0.265490±0.000206	0.009026±0.000042	0.000260±0.000026	0.199534±0.001079	0.000888±0.000011
Packet IRR354-QG, Experiment #16Z0250, 0.1576 g Basalt, all errors ±1 sigma
J = 0.000225267930030 ± 3.12299E-07	2016-08-27
40Ar* is radiogenic argon, isotopes in volts (1.48e-13 moles/volt), corrected for blank, background, discrimination, and decay
Calculated bulk K/Ca = 0.106 ± 4.081e-2, Calculated K2O = 0.86%wt., Calculated CaO = 9.96%wt., Calculated Cl = -0.6ppm
Total Gas Age = 317.7 ± 9.9 ka
Weighted Mean Plateau Age = 295.012 ± 15.371 ka (±1 sigma, including ±J), 100.000% 39Ar released
Weighted Mean Plateau Age = 295.012 ± 9.018 ka (A priori, including ±J), 100.000% 39Ar released
Weighted Mean Plateau Age = 295.012 ± 33.832 ka (95% confidence, including ±J)
MSWD = 2.91 (Poor fit, MSWD > 1.94)
Plateau K/Ca = 0.1938
Plateau K/Cl = -2475.0000
% radiogenic (plateau norm.) = 10.2115
Steps 13 of 13 (550,625,700,750,800,850,925,1000,1075,1150,1200,1250,1350°C)
Isochron Age = 232.743 ± 15.875 ka (±1 sigma, including ±J)
Isochron Age = 232.743 ± 15.875 ka (A Priori Errors, including ±J)
Isochron Age = 232.743 ± 35.363 ka (95% confidence, including ±J)
MSWD = 0.98 (Good fit, MSWD < 1.99)
40Ar/36Ar intercept = 305.2 ± 1.4 (±1 sigma)
40Ar/36Ar intercept = 305.2 ± 1.4 (A Priori)
40Ar/36Ar intercept = 305.2 ± 3.1 (95% confidence)
Steps 13 of 13 (550,625,700,750,800,850,925,1000,1075,1150,1200,1250,1350°C)
-----------------
R16DD221	Fluence monitor = Bodie Hills sanidine @ 9.635 ± 0.003 Ma, equivalent to Fish Canyon sanidine @ 27.642 ± 0.012 Ma with R(FCs/BHs) of 2.88340 ± 0.00089
Temp(°C)	Age(ka)	%40Ar*	K/Ca	K/Cl	moles 40Ar*	%39Ar	40Ar	39Ar	38Ar	37Ar	36Ar
550	96.4±46.5	3.08	0.22	-17067	8.647e-16	0.05	0.189932±0.000274	0.025029±0.000047	0.000439±0.000023	0.060207±0.000127	0.000633±0.000009
625	54.8±21.5	2.38	0.25	-3504	1.379e-15	0.18	0.392111±0.001124	0.070260±0.000104	0.001080±0.000015	0.149815±0.000296	0.001324±0.000012
700	1.8±24.7	0.05	0.26	-3345	3.764e-17	0.3	0.478116±0.001182	0.059986±0.000075	0.001013±0.000027	0.122845±0.000214	0.001635±0.000011
775	-6.7±25.2	-0.15	0.26	-9121	-1.22e-16	0.39	0.545886±0.000520	0.050474±0.000066	0.000984±0.000017	0.100849±0.000251	0.001859±0.000010
875	16.0±33.0	0.29	0.19	-4230	3.152e-16	0.5	0.725900±0.000598	0.055158±0.000072	0.001126±0.000021	0.151744±0.000541	0.002467±0.000015
975	125.6±36.7	2.17	0.15	3786	1.731e-15	0.57	0.539348±0.000316	0.038491±0.000062	0.000883±0.000026	0.135994±0.000408	0.001805±0.000011
1075	97.8±26.6	1.7	0.16	6493	2.453e-15	0.71	0.977449±0.000318	0.070030±0.000089	0.001573±0.000030	0.231747±0.000352	0.003283±0.000015
1125	75.8±58.2	0.75	0.09	1250	7.111e-16	0.76	0.636743±0.000275	0.026233±0.000053	0.000834±0.000018	0.145450±0.000110	0.002157±0.000012
1200	178.5±26.5	1.99	0.04	1803	8.028e-15	0.99	2.708863±0.000807	0.125470±0.000111	0.003644±0.000052	1.559547±0.002181	0.009331±0.000025
1300	639.8±486.5	1.31	0.02	4621	6.013e-16	1	0.310914±0.000235	0.002667±0.000030	0.000231±0.000019	0.068464±0.000281	0.001047±0.000010
Packet IRR350-MA, Experiment #16Z0143, 0.1570 g Basalt, all errors ±1 sigma
J = 0.000228594299391 ± 0.000000356933039
40Ar* is radiogenic argon, isotopes in volts (1.48e-13 moles/volt), corrected for blank, background, discrimination, and decay
Calculated bulk K/Ca = 0.100 ± 5.961e-2, Calculated K2O = 0.83%wt., Calculated CaO = 10.12%wt., Calculated Cl = 9.6e-2ppm
Total Gas Age = 85.1 ± 10.4 ka
Weighted Mean Plateau Age = 25.159 ± 15.895 ka (±1 sigma, including ±J), 49.827% 39Ar released
Weighted Mean Plateau Age = 25.159 ± 12.177 ka (A priori, including ±J), 49.827% 39Ar released
Weighted Mean Plateau Age = 25.159 ± 50.577 ka (95% confidence, including ±J)
MSWD = 1.70 (Good fit, MSWD < 2.77)
Plateau K/Ca = 0.2369
Plateau K/Cl = -6009.0000
% radiogenic (plateau norm.) = 0.9803
Steps 5 of 10 (550,625,700,775,875°C)
Isochron Age = 86.200 ± 46.512 ka (±1 sigma, including ±J)
Isochron Age = 86.200 ± 39.569 ka (A Priori Errors, including ±J)
Isochron Age = 86.200 ± 110.001 ka (95% confidence, including ±J)
MSWD = 1.38 (Good fit, MSWD < 3.12)
40Ar/36Ar intercept = 293.3 ± 3.8 (±1 sigma)
40Ar/36Ar intercept = 293.3 ± 3.2 (A Priori)
40Ar/36Ar intercept = 293.3 ± 8.9 (95% confidence)
Steps 5 of 10 (550,625,700,775,875°C)
-----------------
R16MS080	Fluence monitor = Bodie Hills sanidine @ 9.7970 ± 0.0031 Ma, equivalent to Fish Canyon sanidine @ 28.1053 ± 0.0124 Ma with R(FCs/BHs) of 2.88340 ± 0.00089
Temp(°C)	Age(ka)	%40Ar*	K/Ca	K/Cl	moles 40Ar*	%39Ar	40Ar	39Ar	38Ar	37Ar	36Ar
550	71.5±67.0	3.5	0.39	-9021	2.703e-16	0.02	0.108677±0.000227	0.021150±0.000057	0.000334±0.000042	0.028257±0.000235	0.000359±0.000012
625	147.2±28.5	8.13	0.38	-1982	1.84e-15	0.08	0.318107±0.000697	0.069881±0.000112	0.000952±0.000066	0.095452±0.000888	0.001005±0.000017
700	152.9±15.4	9.38	0.34	-3141	3.896e-15	0.2	0.583814±0.000442	0.142560±0.000160	0.002015±0.000064	0.222408±0.000895	0.001834±0.000018
775	162.1±13.6	9.65	0.29	-9636	4.123e-15	0.32	0.600443±0.000354	0.142266±0.000148	0.002152±0.000056	0.260891±0.001415	0.001890±0.000016
850	163.6±18.3	8.67	0.27	-3086	3.317e-15	0.42	0.537658±0.000286	0.113418±0.000138	0.001645±0.000048	0.218448±0.001952	0.001706±0.000017
925	168.3±24.1	6.97	0.23	-26753	2.602e-15	0.49	0.524421±0.000377	0.086538±0.000105	0.001433±0.000050	0.196144±0.000623	0.001689±0.000017
1025	166.9±26.7	5.22	0.19	-61546	2.472e-15	0.56	0.665845±0.000355	0.082890±0.000131	0.001484±0.000025	0.230176±0.001359	0.002178±0.000019
1125	183.2±25.1	3.68	0.17	20768	3.771e-15	0.66	1.441147±0.000580	0.115297±0.000157	0.002416±0.000089	0.347682±0.001323	0.004747±0.000024
1200	211.0±22.1	2.58	0.05	2021	1.342e-14	0.96	7.302041±0.001970	0.357759±0.000244	0.009991±0.000195	3.464476±0.002514	0.024798±0.000062
1250	376.4±74.1	3.91	0.04	1653	2.217e-15	0.99	0.797870±0.000405	0.033224±0.000070	0.001012±0.000024	0.436572±0.002097	0.002691±0.000020
1350	348.6±151.3	3.25	0.03	2855	8.204e-16	1	0.354255±0.000277	0.013303±0.000056	0.000414±0.000017	0.214548±0.000889	0.001208±0.000017
Packet IRR357-SW, Experiment #16Z0336, 0.14 g Basalt, all errors ±1 sigma
J = 0.000220379876 ± 0.000000227936	2016-12-07
40Ar* is radiogenic argon, isotopes in volts (7.12e-14 moles/volt), corrected for blank, background, discrimination, and decay
Calculated bulk K/Ca = 0.108 ± 6.724e-2, Calculated K2O = 1.04%wt., Calculated CaO = 11.84%wt., Calculated Cl = 6.7e-2ppm
Total Gas Age = 184.4 ± 8.8 ka
Weighted Mean Plateau Age = 168.1 ± 9.1 ka (±1 sigma, including ±J), 100.0% 39Ar released
Weighted Mean Plateau Age = 168.1 ± 6.9 ka (A priori, including ±J), 100.0% 39Ar released
Weighted Mean Plateau Age = 168.1 ± 20.5 ka (95% confidence, including ±J)
MSWD = 1.73 (Good fit, MSWD < 2.05)
Plateau K/Ca = 0.196
Plateau K/Cl = -5705
% radiogenic (plateau norm.) = 5.9
Steps 11 of 11 (550,625,700,775,850,925,1025,1125,1200,1250,1350°C)
Isochron Age = 139.2 ± 11.3 ka (±1 sigma, including ±J)
Isochron Age = 139.2 ± 11.3 ka (A Priori Errors, including ±J)
Isochron Age = 139.2 ± 26.1 ka (95% confidence, including ±J)
MSWD = 0.73 (Good fit, MSWD < 2.11)
40Ar/36Ar intercept = 301.8 ± 1.0 (±1 sigma)
40Ar/36Ar intercept = 301.8 ± 1.0 (A Priori)
40Ar/36Ar intercept = 301.8 ± 2.3 (95% confidence)
Steps 11 of 11 (550,625,700,775,850,925,1025,1125,1200,1250,1350°C)
-----------------
R14DS001	Fluence monitor = Bodie Hills sanidine @ 9.635 ± 0.003 Ma, equivalent to Fish Canyon sanidine @ 27.642 ± 0.012 Ma with R(FCs/BHs) of 2.88340 ± 0.00089
Temp(°C)	Age(ka)	%40Ar*	K/Ca	K/Cl	moles 40Ar*	∑%39Ar	40Ar	39Ar	38Ar	37Ar	36Ar
550	1066.3±56.5	15.48	0.11	-545	8.603e-15	0.08	0.375511±0.000396	0.021989±0.000062	0.000320±0.000023	0.109194±0.000700	0.001105±0.000010
625	1145.7±39.5	20.31	0.11	-753	1.575e-14	0.22	0.523816±0.000399	0.037456±0.000056	0.000548±0.000026	0.181878±0.001136	0.001464±0.000012
700	1108.8±31.0	19.66	0.11	-1109	2.245e-14	0.42	0.771428±0.000575	0.055176±0.000081	0.000911±0.000035	0.274546±0.001250	0.002174±0.000014
750	1137.9±52.0	29.2	0.12	-864	8.475e-15	0.5	0.196109±0.000228	0.020288±0.000044	0.000256±0.000017	0.086213±0.000667	0.000494±0.000009
800	1046.0±55.9	23.43	0.11	-1862	7.647e-15	0.57	0.220546±0.000199	0.019921±0.000051	0.000325±0.000022	0.094305±0.000815	0.000598±0.000009
875	981.2±71.4	18.34	0.08	34879	6.511e-15	0.64	0.239896±0.000170	0.018106±0.000041	0.000367±0.000017	0.118201±0.000656	0.000696±0.000011
975	1073.3±90.8	14	0.07	-2312	4.74e-15	0.69	0.228687±0.000166	0.012062±0.000031	0.000263±0.000016	0.095467±0.001172	0.000692±0.000009
1075	1004.5±65.7	13.65	0.08	-2622	6.234e-15	0.75	0.308472±0.000198	0.016934±0.000041	0.000366±0.000020	0.111872±0.000266	0.000933±0.000009
1175	1116.1±81.8	7.76	0.03	422	7.08e-15	0.81	0.616490±0.000280	0.017445±0.000042	0.000771±0.000022	0.305223±0.001071	0.002010±0.000012
1250	1324.7±76.8	7.98	0.01	2175	1.808e-14	0.95	1.531191±0.000500	0.038329±0.000057	0.001510±0.000038	1.777076±0.001819	0.005268±0.000021
1350	1393.0±107.6	9.12	0.01	3262	6.886e-15	1	0.510000±0.000268	0.013761±0.000045	0.000503±0.000012	0.473533±0.000925	0.001701±0.000012
Packet IRR340-GL, Experiment #15Z0281, 0.1531 g Basalt, all errors ±1 sigma
J = 0.000222870968337 ± 2.3642E-07
40Ar* is radiogenic argon, isotopes in volts (1.48e-13 moles/volt), corrected for blank, background, discrimination, and decay
Calculated bulk K/Ca = 3.889e-2 ± 2.053e-2, Calculated K2O = 0.45%wt., Calculated CaO = 14.14%wt., Calculated Cl = -0.2ppm
Total Gas Age = 1135.8 ± 18.1 ka
Weighted Mean Plateau Age = 1093.6 ± 17.3 ka (±1 sigma, including ±J), 81.2% 39Ar released
Weighted Mean Plateau Age = 1093.6 ± 17.2 ka (a priori, including ±J), 81.2% 39Ar released
Weighted Mean Plateau Age = 1093.6 ± 41.0 ka (95% confidence, including ±J)
MSWD = 1.01 (Good fit, MSWD < 2.19)
Plateau K/Ca = 9.5523e-2
Plateau K/Cl = 1870.0000
% radiogenic (plateau norm.) = 18.7559
Steps 9 of 11 (550,625,700,750,800,875,975,1075,1175°C)
Isochron Age = 1100.2 ± 48.4 ka (±1 sigma, including ±J)
Isochron Age = 1100.2 ± 44.7 ka (a priori Errors, including ±J)
Isochron Age = 1100.2 ± 111.6 ka (95% confidence, including ±J)
MSWD = 1.17 (Good fit, MSWD < 2.29)
40Ar/36Ar intercept = 295.0 ± 2.7 (±1 sigma)
40Ar/36Ar intercept = 295.0 ± 2.5 (a priori)
40Ar/36Ar intercept = 295.0 ± 6.2 (95% confidence)
Steps 9 of 11 (550,625,700,750,800,875,975,1075,1175°C)
-----------------
R16MS075	Fluence monitor = Bodie Hills sanidine @ 9.7970 ± 0.0031 Ma, equivalent to Fish Canyon sanidine @ 28.1053 ± 0.0124 Ma with R(FCs/BHs) of 2.88340 ± 0.00089
Temp(°C)	Age(ka)	%40Ar*	K/Ca	K/Cl	moles 40Ar*	%39Ar	40Ar	39Ar	38Ar	37Ar	36Ar
550	149.5±67.9	6.78	0.2	3000	5.763e-16	0.03	0.118685±0.000220	0.021549±0.000061	0.000385±0.000034	0.056648±0.000693	0.000386±0.000012
625	148.0±33.0	6.93	0.2	-40494	1.697e-15	0.1	0.344317±0.000444	0.064555±0.000098	0.001046±0.000025	0.164961±0.001169	0.001120±0.000018
700	112.2±28.4	3.36	0.18	-4823	1.603e-15	0.19	0.669968±0.000604	0.080442±0.000115	0.001396±0.000030	0.231095±0.001200	0.002233±0.000019
775	129.1±41.6	2.81	0.2	-5953	1.311e-15	0.26	0.650499±0.000424	0.056781±0.000091	0.001105±0.000045	0.151008±0.001328	0.002160±0.000020
850	105.4±41.0	2.48	0.2	-2871	1.078e-15	0.33	0.610418±0.000407	0.057531±0.000137	0.001046±0.000064	0.153622±0.000574	0.002037±0.000020
950	140.6±35.8	3.1	0.15	-4758	1.718e-15	0.4	0.777908±0.000388	0.068800±0.000120	0.001320±0.000037	0.246388±0.001276	0.002594±0.000021
1050	134.3±21.5	3.53	0.16	22347	3.096e-15	0.55	1.224470±0.000461	0.128860±0.000146	0.002468±0.000071	0.433627±0.001068	0.004078±0.000023
1125	171.1±27.1	3.7	0.18	5032	4.126e-15	0.71	1.558001±0.000438	0.134787±0.000182	0.002834±0.000085	0.386053±0.001224	0.005134±0.000030
1200	225.7±21.5	4.17	0.05	1876	8.259e-15	0.95	2.780810±0.000869	0.207166±0.000163	0.004912±0.000136	2.180096±0.006439	0.009537±0.000034
1250	216.2±69.7	2.25	0.02	-6498	1.38e-15	0.99	0.863728±0.000493	0.036511±0.000077	0.001007±0.000072	0.930119±0.002276	0.003089±0.000020
1400	535.7±203.9	3.75	0.02	-1279	7.672e-16	1	0.287657±0.000265	0.008193±0.000043	0.000259±0.000021	0.208431±0.000791	0.000986±0.000014
Packet IRR357-TG, Experiment #16Z0340, 0.1317 g Basalt, all errors ±1 sigma
J = 0.000221594804 ± 0.000000272774	2016-12-09
40Ar* is radiogenic argon, isotopes in volts (7.12e-14 moles/volt), corrected for blank, background, discrimination, and decay
Calculated bulk K/Ca = 8.791e-2 ± 4.274e-2, Calculated K2O = 0.81%wt., Calculated CaO = 11.29%wt., Calculated Cl = 8.0e-2ppm
Total Gas Age = 166.6 ± 10.1 ka
Weighted Mean Plateau Age = 137.3 ± 11.3 ka (±1 sigma, including ±J), 71.1% 39Ar released
Weighted Mean Plateau Age = 137.3 ± 11.3 ka (A priori, including ±J), 71.1% 39Ar released
Weighted Mean Plateau Age = 137.3 ± 18.5 ka (95% confidence, including ±J)
MSWD = 0.45 (Good fit, MSWD < 2.29)
Plateau K/Ca = 0.178
Plateau K/Cl = -306
% radiogenic (plateau norm.) = 3.8
Steps 8 of 11 (550,625,700,775,850,950,1050,1125°C)
Isochron Age = 121.4 ± 52.8 ka (±1 sigma, including ±J)
Isochron Age = 121.4 ± 52.8 ka (A Priori Errors, including ±J)
Isochron Age = 121.4 ± 121.7 ka (95% confidence, including ±J)
MSWD = 0.51 (Good fit, MSWD < 2.40)
40Ar/36Ar intercept = 299.8 ± 4.2 (±1 sigma)
40Ar/36Ar intercept = 299.8 ± 4.2 (A Priori)
40Ar/36Ar intercept = 299.8 ± 9.7 (95% confidence)
Steps 8 of 11 (550,625,700,775,850,950,1050,1125°C)
-----------------
R15MS041	Fluence monitor = Bodie Hills sanidine @ 9.7970 ± 0.0031 Ma, equivalent to Fish Canyon sanidine @ 28.1053 ± 0.0124 Ma with R(FCs/BHs) of 2.88340 ± 0.00089
Temp(°C)	Age(ka)	%40Ar*	K/Ca	K/Cl	moles 40Ar*	%39Ar	40Ar	39Ar	38Ar	37Ar	36Ar
550	894±149	3.7	0.08	-274	3.708e-15	0.06	0.677538±0.000348	0.011693±0.000087	0.000382±0.000022	0.075980±0.000290	0.002207±0.000014
625	437±95	1.89	0.05	-551	3.752e-15	0.19	1.339561±0.000605	0.024246±0.000132	0.000960±0.000026	0.239164±0.000958	0.004469±0.000018
700	548±118	1.78	0.05	-1082	3.384e-15	0.28	1.286993±0.000408	0.017474±0.000047	0.000956±0.000056	0.177847±0.000445	0.004284±0.000016
800	498±111	1.46	0.08	19906	2.948e-15	0.36	1.362856±0.000448	0.016713±0.000046	0.001067±0.000032	0.113197±0.000453	0.004530±0.000015
900	299±128	1.12	0.07	19127	1.313e-15	0.43	0.794320±0.000238	0.012372±0.000038	0.000659±0.000032	0.093259±0.000635	0.002657±0.000013
1000	660±145	2.91	0.07	-2487	2.873e-15	0.49	0.667189±0.000247	0.012283±0.000051	0.000548±0.000028	0.096419±0.000418	0.002197±0.000014
1100	534±101	1.95	0.07	-3181	5.019e-15	0.63	1.739972±0.000533	0.026520±0.000053	0.001386±0.000058	0.194652±0.000427	0.005769±0.000021
1175	570±85	1.94	0.03	1408	8.453e-15	0.84	2.938157±0.000968	0.042112±0.000083	0.002500±0.000052	0.657887±0.001517	0.009835±0.000028
1250	508±117	1.36	0.01	-467001	4.262e-15	0.97	2.120018±0.000583	0.024419±0.000062	0.001658±0.000043	1.194945±0.001687	0.007340±0.000021
1350	2199±271	4.91	0.01	3302	4.692e-15	1	0.646104±0.000280	0.006217±0.000033	0.000482±0.000029	0.323734±0.000650	0.002149±0.000013
1450	5847±2024	9.6	0.01	156	1.071e-15	1	0.075390±0.000136	0.000543±0.000017	0.000065±0.000030	0.041720±0.000318	0.000240±0.000008
Packet IRR351-OM, Experiment #16Z0217, 0.1497 g Basalt, all errors ±1 sigma
J = 0.000230318877945 ± 4.1729E-07	2016-07-27
40Ar* is radiogenic argon, isotopes in volts (1.48e-13 moles/volt), corrected for blank, background, discrimination, and decay
Calculated bulk K/Ca = 3.145e-2 ± 1.437e-2, Calculated K2O = 0.32%wt., Calculated CaO = 12.37%wt., Calculated Cl = -0.1ppm
Total Gas Age = 605.4 ± 36.6 ka
Weighted Mean Plateau Age = 507.437 ± 38.318 ka (±1 sigma, including ±J), 90.568% 39Ar released
Weighted Mean Plateau Age = 507.437 ± 38.318 ka (A priori, including ±J), 90.568% 39Ar released
Weighted Mean Plateau Age = 507.437 ± 79.329 ka (95% confidence, including ±J)
MSWD = 0.72 (Good fit, MSWD < 2.29)
Plateau K/Ca = 4.9428e-2
Plateau K/Cl = -6.0450e+4
% radiogenic (plateau norm.) = 1.8048
Steps 8 of 11 (625,700,800,900,1000,1100,1175,1250°C)
Isochron Age = 445.1 ± 246.4 ka (±1 sigma, including ±J)
Isochron Age = 445.1 ± 246.4 ka (A Priori Errors, including ±J)
Isochron Age = 445.1 ± 568.2 ka (95% confidence, including ±J)
MSWD = 0.83 (Good fit, MSWD < 2.40)
40Ar/36Ar intercept = 299.2 ± 2.6 (±1 sigma)
40Ar/36Ar intercept = 299.2 ± 2.6 (A Priori)
40Ar/36Ar intercept = 299.2 ± 5.9 (95% confidence)
Steps 8 of 11 (625,700,800,900,1000,1100,1175,1250°C)
-----------------
R15MS021	Fluence monitor = Bodie Hills sanidine @ 9.635 ± 0.003 Ma, equivalent to Fish Canyon sanidine @ 27.642 ± 0.012 Ma with R(FCs/BHs) of 2.88340 ± 0.00089
Temp(°C)	Age(ka)	%40Ar*	K/Ca	K/Cl	moles 40Ar*	%39Ar	40Ar	39Ar	38Ar	37Ar	36Ar
550	489.6±30.6	24.68	0.22	-3814	5.738e-15	0.07	0.157117±0.000171	0.031686±0.000049	0.000457±0.000022	0.073792±0.000308	0.000421±0.000008
625	485.5±28.3	20.46	0.2	-6534	6.605e-15	0.14	0.218131±0.000186	0.036790±0.000053	0.000571±0.000017	0.096430±0.000790	0.000614±0.000009
700	521.3±24.3	20.97	0.19	-3863	7.955e-15	0.23	0.256283±0.000207	0.041272±0.000061	0.000627±0.000019	0.115982±0.000724	0.000718±0.000008
775	426.0±28.9	15.86	0.21	-16842	5.333e-15	0.3	0.227203±0.000195	0.033850±0.000058	0.000559±0.000015	0.085058±0.000414	0.000671±0.000008
875	515.4±32.9	16.56	0.21	8294	5.71e-15	0.36	0.232945±0.000149	0.029961±0.000051	0.000534±0.000019	0.076037±0.000380	0.000679±0.000008
975	436.8±41.4	11.28	0.16	-1749	4.005e-15	0.41	0.239889±0.000155	0.024806±0.000058	0.000402±0.000019	0.079232±0.000541	0.000742±0.000009
1075	475.5±25.6	15.02	0.17	40896	8.225e-15	0.51	0.370042±0.000177	0.046793±0.000052	0.000822±0.000023	0.145969±0.000635	0.001105±0.000010
1150	501.2±14.0	14	0.15	3846	2.134e-14	0.74	1.029895±0.000326	0.115182±0.000106	0.002211±0.000030	0.403123±0.000934	0.003110±0.000013
1200	537.5±22.3	10.79	0.04	7379	2.15e-14	0.97	1.346459±0.000494	0.108990±0.000123	0.002289±0.000030	1.455097±0.002624	0.004474±0.000018
1250	543.6±70.1	7.58	0.02	27377	3.324e-15	1	0.296289±0.000171	0.016821±0.000036	0.000407±0.000016	0.447857±0.001338	0.001052±0.000009
Packet IRR346-LM, Experiment #16Z0085, 0.153 g Basalt, all errors ±1 sigma
J = 0.000221466227574 ± 2.796517E-07
40Ar* is radiogenic argon, isotopes in volts (1.48e-13 moles/volt), corrected for blank, background, discrimination, and decay
Calculated bulk K/Ca = 8.527e-2 ± 4.585e-2, Calculated K2O = 0.81%wt., Calculated CaO = 11.69%wt., Calculated Cl = 1.7e-2ppm
Total Gas Age = 500.4 ± 8.3 ka
Weighted Mean Plateau Age = 496.7 ± 10.1 ka (±1 sigma, including ±J), 100.0% 39Ar released
Weighted Mean Plateau Age = 496.7 ± 8.0 ka (A priori, including ±J), 100.0% 39Ar released
Weighted Mean Plateau Age = 496.7 ± 23.3 ka (95% confidence, including ±J)
MSWD = 1.58 (Good fit, MSWD < 2.11)
Plateau K/Ca = 0.1424
Plateau K/Cl = 5610.0000
% radiogenic (plateau norm.) = 15.0923
Steps 10 of 10 (550,625,700,775,875,975,1075,1150,1200,1250°C)
Isochron Age = 451.8 ± 31.7 ka (±1 sigma, including ±J)
Isochron Age = 451.8 ± 26.4 ka (A Priori Errors, including ±J)
Isochron Age = 451.8 ± 74.9 ka (95% confidence, including ±J)
MSWD = 1.44 (Good fit, MSWD < 2.19)
40Ar/36Ar intercept = 300.0 ± 3.1 (±1 sigma)
40Ar/36Ar intercept = 300.0 ± 2.6 (A Priori)
40Ar/36Ar intercept = 300.0 ± 7.4 (95% confidence)
Steps 10 of 10 (550,625,700,775,875,975,1075,1150,1200,1250°C)
-----------------
R15TS197	Fluence monitor = Bodie Hills sanidine @ 9.7970 ± 0.0031 Ma, equivalent to Fish Canyon sanidine @ 28.1053 ± 0.0124 Ma with R(FCs/BHs) of 2.88340 ± 0.00089
Temp(°C)	Age(ka)	%40Ar*	K/Ca	K/Cl	moles 40Ar*	%39Ar	40Ar	39Ar	38Ar	37Ar	36Ar
550	438.3±59.9	11.83	0.25	-466	3.311e-15	0.04	0.189196±0.000503	0.020817±0.000059	0.000188±0.000037	0.043087±0.000402	0.000571±0.000010
625	407.7±27.8	13.24	0.27	-865	6.473e-15	0.12	0.330447±0.000463	0.043740±0.000067	0.000540±0.000025	0.084183±0.000277	0.000984±0.000010
700	302.1±26.2	10.31	0.28	-1320	6.05e-15	0.22	0.396387±0.000300	0.055178±0.000072	0.000771±0.000073	0.102434±0.000537	0.001219±0.000012
775	264.9±32.0	7.79	0.29	-2008	3.493e-15	0.29	0.302972±0.000191	0.036330±0.000053	0.000576±0.000024	0.064607±0.000279	0.000954±0.000010
850	281.5±38.2	6.19	0.27	-1637	3.138e-15	0.34	0.342761±0.000231	0.030714±0.000040	0.000526±0.000031	0.060083±0.000347	0.001094±0.000010
950	349.6±52.3	7.21	0.22	-990	3.419e-15	0.39	0.320452±0.000344	0.026959±0.000062	0.000425±0.000024	0.064608±0.000369	0.001014±0.000012
1050	310.9±40.8	6.27	0.22	-1891	4.594e-15	0.47	0.495346±0.000220	0.040728±0.000063	0.000736±0.000057	0.096131±0.000531	0.001582±0.000014
1100	292.4±33.1	4.53	0.22	4654	5.024e-15	0.56	0.750142±0.000290	0.047352±0.000061	0.001117±0.000022	0.111841±0.000448	0.002430±0.000013
1150	342.9±28.5	5.11	0.16	2872	8.492e-15	0.68	1.123061±0.000345	0.068296±0.000091	0.001672±0.000028	0.225251±0.000517	0.003632±0.000016
1200	373.0±23.6	4.77	0.06	10420	1.977e-14	0.95	2.801477±0.000789	0.146701±0.000132	0.003687±0.000060	1.221329±0.001152	0.009279±0.000027
1250	314.4±147.9	1.67	0.05	1578	2.62e-15	0.99	1.058651±0.000526	0.023106±0.000088	0.001024±0.000058	0.244320±0.000441	0.003555±0.000028
1350	1287.6±356.2	5.42	0.02	-933	1.762e-15	1	0.219513±0.000227	0.003824±0.000040	0.000165±0.000020	0.084946±0.000488	0.000719±0.000011
Packet IRR354-QB, Experiment #16Z0245, 0.1397 g Basalt, all errors ±1 sigma
J = 0.000225746873107 ± 3.75422E-07	2016-08-22
40Ar* is radiogenic argon, isotopes in volts (1.48e-13 moles/volt), corrected for blank, background, discrimination, and decay
Calculated bulk K/Ca = 0.118 ± 6.375e-2, Calculated K2O = 0.98%wt., Calculated CaO = 10.13%wt., Calculated Cl = -0.3ppm
Total Gas Age = 345.9 ± 12.0 ka
Weighted Mean Plateau Age = 319.605 ± 13.181 ka (±1 sigma, including ±J), 87.412% 39Ar released
Weighted Mean Plateau Age = 319.605 ± 11.148 ka (A priori, including ±J), 87.412% 39Ar released
Weighted Mean Plateau Age = 319.605 ± 31.172 ka (95% confidence, including ±J)
MSWD = 1.40 (Good fit, MSWD < 2.19)
Plateau K/Ca = 0.1708
Plateau K/Cl = 3529.0000
% radiogenic (plateau norm.) = 5.8787
Steps 9 of 12 (700,775,850,950,1050,1100,1150,1200,1250°C)
Isochron Age = 255.591 ± 30.481 ka (±1 sigma, including ±J)
Isochron Age = 255.591 ± 30.481 ka (A Priori Errors, including ±J)
Isochron Age = 255.591 ± 68.942 ka (95% confidence, including ±J)
MSWD = 0.86 (Good fit, MSWD < 2.29)
40Ar/36Ar intercept = 302.2 ± 1.6 (±1 sigma)
40Ar/36Ar intercept = 302.2 ± 1.6 (A Priori)
40Ar/36Ar intercept = 302.2 ± 3.7 (95% confidence)
Steps 9 of 12 (700,775,850,950,1050,1100,1150,1200,1250°C)
-----------------
R16MS078	Fluence monitor = Bodie Hills sanidine @ 9.7970 ± 0.0031 Ma, equivalent to Fish Canyon sanidine @ 28.1053 ± 0.0124 Ma with R(FCs/BHs) of 2.88340 ± 0.00089
Temp(°C)	Age(ka)	%40Ar*	K/Ca	K/Cl	moles 40Ar*	%39Ar	40Ar	39Ar	38Ar	37Ar	36Ar
550	533.4±194.9	16.74	0.38	-93	8.874e-16	0.01	0.074518±0.001608	0.009331±0.000103	-0.000269±0.000089	0.012928±0.000830	0.000211±0.000014
625	372.4±55.6	16.94	0.34	-198	4.606e-15	0.07	0.382129±0.005461	0.069393±0.000333	-0.000393±0.000093	0.107122±0.001199	0.001093±0.000027
700	391.0±34.4	16.51	0.29	-530	6.512e-15	0.15	0.550715±0.002620	0.092805±0.000198	0.000761±0.000053	0.168409±0.001268	0.001587±0.000025
775	336.1±32.7	12.05	0.27	-1499	4.374e-15	0.22	0.510166±0.000975	0.073023±0.000152	0.001035±0.000076	0.140661±0.001249	0.001542±0.000020
850	297.1±25.3	12.12	0.31	-4971	4.071e-15	0.29	0.472132±0.000502	0.076865±0.000106	0.001207±0.000045	0.128501±0.001366	0.001426±0.000016
950	335.5±26.7	13.73	0.29	-532	6.011e-15	0.38	0.615287±0.001682	0.100525±0.000149	0.000848±0.000074	0.180791±0.001584	0.001828±0.000022
1050	352.4±22.8	14.3	0.23	-1064	6.931e-15	0.48	0.681256±0.001084	0.110392±0.000179	0.001377±0.000078	0.253515±0.000541	0.002026±0.000021
1150	347.4±14.5	11.54	0.19	4529	1.349e-14	0.67	1.642547±0.000536	0.218049±0.000230	0.003995±0.000133	0.614051±0.003367	0.005038±0.000026
1200	354.1±14.8	8.93	0.08	3160	1.391e-14	0.87	2.190352±0.000785	0.221217±0.000202	0.004490±0.000075	1.493216±0.006089	0.007100±0.000026
1250	395.3±31.0	6.91	0.05	-5605	9.017e-15	0.99	1.834276±0.000710	0.128739±0.000198	0.002693±0.000070	1.268334±0.004102	0.006075±0.000032
1375	680.0±121.9	4.95	0.03	-861	1.997e-15	1	0.566980±0.000426	0.016653±0.000100	0.000481±0.000045	0.275707±0.002425	0.001882±0.000017
Packet IRR357-TB, Experiment #16Z0376, 0.141 g Basalt, all errors ±1 sigma
J = 0.000221025960 ± 0.000000272979	2016-12-30
40Ar* is radiogenic argon, isotopes in volts (7.12e-14 moles/volt), corrected for blank, background, discrimination, and decay
Calculated bulk K/Ca = 0.126 ± 5.761e-2, Calculated K2O = 0.98%wt., Calculated CaO = 9.53%wt., Calculated Cl = -0.9ppm
Total Gas Age = 361.1 ± 8.4 ka
Weighted Mean Plateau Age = 349.1 ± 7.9 ka (±1 sigma, including ±J), 97.7% 39Ar released
Weighted Mean Plateau Age = 349.1 ± 7.6 ka (A priori, including ±J), 97.7% 39Ar released
Weighted Mean Plateau Age = 349.1 ± 18.7 ka (95% confidence, including ±J)
MSWD = 1.08 (Good fit, MSWD < 2.19)
Plateau K/Ca = 0.196
Plateau K/Cl = 220
% radiogenic (plateau norm.) = 11.8
Steps 9 of 11 (625,700,775,850,950,1050,1150,1200,1250°C)
Isochron Age = 308.2 ± 26.7 ka (±1 sigma, including ±J)
Isochron Age = 308.2 ± 26.7 ka (A Priori Errors, including ±J)
Isochron Age = 308.2 ± 61.6 ka (95% confidence, including ±J)
MSWD = 0.89 (Good fit, MSWD < 2.29)
40Ar/36Ar intercept = 302.8 ± 2.7 (±1 sigma)
40Ar/36Ar intercept = 302.8 ± 2.7 (A Priori)
40Ar/36Ar intercept = 302.8 ± 6.2 (95% confidence)
Steps 9 of 11 (625,700,775,850,950,1050,1150,1200,1250°C)
-----------------
R15TS161	Fluence monitor = Bodie Hills sanidine @ 9.7970 ± 0.0031 Ma, equivalent to Fish Canyon sanidine @ 28.1053 ± 0.0124 Ma with R(FCs/BHs) of 2.88340 ± 0.00089
Temp(°C)	Age(ka)	%40Ar*	K/Ca	K/Cl	moles 40Ar*	%39Ar	40Ar	39Ar	38Ar	37Ar	36Ar
550	1496.3±87.5	87.72	0.98	-239	7.587e-15	0.02	0.058451±0.000551	0.014099±0.000059	-0.000063±0.000035	0.007514±0.000392	0.000026±0.000010
625	1092.7±37.4	35.5	0.43	-531	1.763e-14	0.08	0.335550±0.000877	0.044889±0.000090	0.000364±0.000046	0.055187±0.000718	0.000740±0.000013
700	996.9±26.3	21.92	0.27	-617	2.852e-14	0.19	0.879323±0.001338	0.079640±0.000108	0.000927±0.000140	0.157326±0.000369	0.002344±0.000016
775	869.0±45.5	19.85	0.31	6024	2.096e-14	0.29	0.713656±0.000760	0.067132±0.000120	0.001291±0.000066	0.112774±0.001033	0.001947±0.000025
825	857.7±47.5	25.61	0.47	2948	1.265e-14	0.35	0.333750±0.000537	0.041028±0.000083	0.000755±0.000049	0.046226±0.000634	0.000844±0.000016
900	997.9±45.5	22.18	0.36	2248	1.762e-14	0.42	0.536942±0.000469	0.049147±0.000111	0.001003±0.000073	0.072415±0.000541	0.001420±0.000018
975	1013.9±42.1	20.14	0.28	-1920	1.997e-14	0.49	0.670074±0.000380	0.054822±0.000111	0.000935±0.000022	0.100871±0.000419	0.001821±0.000019
1050	1041.1±42.8	20.15	0.25	5000	2.417e-14	0.58	0.810382±0.000485	0.064631±0.000136	0.001313±0.000041	0.133694±0.000770	0.002205±0.000022
1100	992.9±28.9	18.8	0.24	-7740	2.081e-14	0.66	0.747816±0.000406	0.058346±0.000089	0.001117±0.000052	0.125390±0.000416	0.002069±0.000014
1150	1013.4±31.7	14.32	0.19	1909	2.172e-14	0.75	1.025309±0.000436	0.059709±0.000082	0.001473±0.000021	0.168129±0.000391	0.002990±0.000015
1200	1030.0±28.0	10.31	0.06	5217	4.684e-14	0.93	3.070685±0.000866	0.127212±0.000127	0.003527±0.000028	1.124136±0.001313	0.009540±0.000028
1250	1107.8±67.6	5.01	0.02	2664	1.786e-14	0.99	2.407189±0.000676	0.045564±0.000076	0.002127±0.000057	1.050552±0.001594	0.007954±0.000024
1350	1554.6±187.6	6.85	0.02	-611	4.485e-15	1	0.442482±0.000284	0.008193±0.000045	0.000315±0.000025	0.244496±0.000558	0.001449±0.000012
Packet IRR354-QD, Experiment #16Z0246, 0.1675 g Basalt, all errors ±1 sigma
J = 0.000228123289588 ± 3.20305E-07	2016-08-23
40Ar* is radiogenic argon, isotopes in volts (1.48e-13 moles/volt), corrected for blank, background, discrimination, and decay
Calculated bulk K/Ca = 0.110 ± 5.190e-2, Calculated K2O = 1.06%wt., Calculated CaO = 11.83%wt., Calculated Cl = -0.3ppm
Total Gas Age = 1018.3 ± 11.7 ka
Weighted Mean Plateau Age = 1.014 ± 1.413e-2 Ma (±1 sigma, including ±J), 57.955% 39Ar released
Weighted Mean Plateau Age = 1.014 ± 1.413e-2 Ma (A priori, including ±J), 57.955% 39Ar released
Weighted Mean Plateau Age = 1.014 ± 2.063e-2 Ma (95% confidence, including ±J)
MSWD = 0.28 (Good fit, MSWD < 2.56)
Plateau K/Ca = 0.1991
Plateau K/Cl = 1576.0000
% radiogenic (plateau norm.) = 16.3418
Steps 6 of 13 (900,975,1050,1100,1150,1200°C)
Isochron Age = 0.988 ± 0.042 Ma (±1 sigma, including ±J)
Isochron Age = 0.988 ± 0.042 Ma (A Priori Errors, including ±J)
Isochron Age = 0.988 ± 0.093 Ma (95% confidence, including ±J)
MSWD = 0.23 (Good fit, MSWD < 2.77)
40Ar/36Ar intercept = 299.9 ± 2.1 (±1 sigma)
40Ar/36Ar intercept = 299.9 ± 2.1 (A Priori)
40Ar/36Ar intercept = 299.9 ± 4.6 (95% confidence)
Steps 6 of 13 (900,975,1050,1100,1150,1200°C)
-----------------
R15MS031	Fluence monitor = Bodie Hills sanidine @ 9.635 ± 0.003 Ma, equivalent to Fish Canyon sanidine @ 27.642 ± 0.012 Ma with R(FCs/BHs) of 2.88340 ± 0.00089
Temp(°C)	Age(ka)	%40Ar*	K/Ca	K/Cl	moles 40Ar*	%39Ar	40Ar	39Ar	38Ar	37Ar	36Ar
550	238.8±60.7	4.66	0.16	-1530	1.562e-15	0.04	0.226379±0.000338	0.018008±0.000065	0.000324±0.000018	0.058197±0.000268	0.000747±0.000009
625	484.6±69.7	7.36	0.14	-250	6.131e-15	0.13	0.563157±0.002892	0.034839±0.000232	0.000195±0.000038	0.129923±0.000284	0.001802±0.000018
725	203.2±55.4	2	0.1	15209	2.603e-15	0.22	0.878525±0.000347	0.035314±0.000052	0.001023±0.000021	0.192706±0.000299	0.002968±0.000016
825	197.4±58.3	2.94	0.14	-3039	1.848e-15	0.28	0.425072±0.000273	0.025778±0.000050	0.000566±0.000027	0.096421±0.000272	0.001423±0.000012
925	222.1±55.0	3.09	0.12	-1165	2.154e-15	0.35	0.470870±0.000571	0.026720±0.000065	0.000544±0.000021	0.118841±0.000273	0.001578±0.000012
1025	344.0±47.2	5.68	0.11	-3096	4.127e-15	0.43	0.491270±0.000286	0.033056±0.000058	0.000685±0.000020	0.152548±0.000268	0.001611±0.000013
1100	230.4±30.2	3.71	0.13	-7513	4.653e-15	0.57	0.847059±0.000309	0.055632±0.000063	0.001220±0.000032	0.219559±0.000492	0.002822±0.000014
1175	375.1±21.7	5.25	0.07	2430	1.638e-14	0.87	2.090351±0.000478	0.119689±0.000095	0.003058±0.000027	0.924447±0.001089	0.006962±0.000021
1275	522.6±48.7	4.45	0.02	2408	9.971e-15	1	1.512361±0.000399	0.053322±0.000070	0.001739±0.000032	1.294488±0.001173	0.005254±0.000020
1375	4729.1±832.7	9.99	0.02	-106	1.867e-15	1	0.126295±0.000199	0.001102±0.000018	0.000043±0.000013	0.026807±0.000163	0.000392±0.000007
Packet IRR345-KC, Experiment #15Z0369, 0.1509 g Basalt, all errors ±1 sigma
J = 0.000225346021974 ± 0.000000326145791
40Ar* is radiogenic argon, isotopes in volts (1.48e-13 moles/volt), corrected for blank, background, discrimination, and decay
Calculated bulk K/Ca = 6.550e-2 ± 3.352e-2, Calculated K2O = 0.67%wt., Calculated CaO = 12.59%wt., Calculated Cl = -0.3ppm
Total Gas Age = 350.3 ± 14.4 ka
Weighted Mean Plateau Age = 242.3 ± 24.6 ka (±1 sigma, including ±J), 43.8% 39Ar released
Weighted Mean Plateau Age = 242.3 ± 20.0 ka (A priori, including ±J), 43.8% 39Ar released
Weighted Mean Plateau Age = 242.3 ± 78.1 ka (95% confidence, including ±J)
MSWD = 1.51 (Good fit, MSWD < 2.77)
Plateau K/Ca = 0.1204
Plateau K/Cl = -528.0000
% radiogenic (plateau norm.) = 3.5302
Steps 5 of 10 (725,825,925,1025,1100°C)
Isochron Age = 344.9 ± 126.3 ka (±1 sigma, including ±J)
Isochron Age = 344.9 ± 99.9 ka (A Priori Errors, including ±J)
Isochron Age = 344.9 ± 298.7 ka (95% confidence, including ±J)
MSWD = 1.60 (Good fit, MSWD < 3.12)
40Ar/36Ar intercept = 290.9 ± 5.5 (±1 sigma)
40Ar/36Ar intercept = 290.9 ± 4.4 (A Priori)
40Ar/36Ar intercept = 290.9 ± 13.0 (95% confidence)
Steps 5 of 10 (725,825,925,1025,1100°C)
-----------------
R15MS037	Fluence monitor = Bodie Hills sanidine @ 9.635 ± 0.003 Ma, equivalent to Fish Canyon sanidine @ 27.642 ± 0.012 Ma with R(FCs/BHs) of 2.88340 ± 0.00089
Temp(°C)	Age(ka)	%40Ar*	K/Ca	K/Cl	moles 40Ar*	%39Ar	40Ar	39Ar	38Ar	37Ar	36Ar
550	305.3±15.5	20.26	0.57	-2119	8.463e-15	0.07	0.282271±0.000366	0.076845±0.000086	0.000998±0.000016	0.070644±0.000405	0.000781±0.000010
600	310.0±15.6	32.61	0.61	-3215	8.244e-15	0.13	0.170837±0.000288	0.073710±0.000092	0.000945±0.000036	0.063790±0.001235	0.000407±0.000009
650	321.9±19.0	19.42	0.46	-1299	8.814e-15	0.2	0.306605±0.000595	0.075921±0.000107	0.000905±0.000045	0.087093±0.000691	0.000860±0.000012
700	290.7±26.9	18.4	0.4	-2024	5.079e-15	0.24	0.186465±0.000306	0.048437±0.000077	0.000632±0.000025	0.063187±0.000397	0.000532±0.000011
750	344.0±25.3	24.38	0.47	-4940	6.537e-15	0.28	0.181160±0.000261	0.052685±0.000074	0.000735±0.000019	0.058412±0.000346	0.000480±0.000011
825	364.4±17.4	21.3	0.54	-4163	9.747e-15	0.35	0.309217±0.000232	0.074139±0.000081	0.001053±0.000021	0.071912±0.000410	0.000844±0.000011
900	372.3±19.0	20.43	0.46	-2058	9.513e-15	0.41	0.314546±0.000259	0.070841±0.000085	0.000943±0.000030	0.081153±0.000345	0.000869±0.000011
975	349.6±26.0	16.36	0.39	-1880	5.554e-15	0.45	0.229360±0.000262	0.044044±0.000051	0.000601±0.000020	0.059324±0.000346	0.000666±0.000009
1050	356.8±15.8	18.54	0.36	-7349	1.151e-14	0.52	0.419677±0.000240	0.089480±0.000076	0.001343±0.000043	0.129352±0.000285	0.001193±0.000012
1125	377.8±11.6	17.07	0.24	8100	2.282e-14	0.67	0.903315±0.000343	0.167531±0.000141	0.002773±0.000031	0.369484±0.000523	0.002638±0.000016
1175	390.6±8.1	16.45	0.14	4886	4.402e-14	0.94	1.808213±0.000543	0.312989±0.000204	0.005370±0.000047	1.187637±0.001482	0.005445±0.000019
1225	360.0±28.4	7.03	0.09	3101	7.81e-15	0.99	0.751151±0.000283	0.060352±0.000074	0.001326±0.000019	0.354502±0.000794	0.002463±0.000014
1275	707.9±119.9	6.82	0.07	-6056	2.177e-15	1	0.215597±0.000156	0.008566±0.000039	0.000235±0.000015	0.065423±0.000598	0.000698±0.000008
1350	703.3±191.2	4.39	0.06	-987	1.396e-15	1	0.214624±0.000174	0.005529±0.000032	0.000180±0.000013	0.045855±0.000330	0.000707±0.000009
Packet IRR341-HP, Experiment #15Z0282, 0.1499 g Basalt, all errors ±1 sigma
J = 0.000227272465101 ± 3.4985E-07
40Ar* is radiogenic argon, isotopes in volts (1.48e-13 moles/volt), corrected for blank, background, discrimination, and decay
Calculated bulk K/Ca = 0.225 ± 0.110, Calculated K2O = 1.94%wt., Calculated CaO = 10.57%wt., Calculated Cl = -0.3ppm
Total Gas Age = 362.5 ± 4.7 ka
Weighted Mean Plateau Age = 376.1 ± 5.7 ka (±1 sigma, including ±J), 75.1% 39Ar released
Weighted Mean Plateau Age = 376.1 ± 5.2 ka (A priori, including ±J), 75.1% 39Ar released
Weighted Mean Plateau Age = 376.1 ± 13.8 ka (95% confidence, including ±J)
MSWD = 1.17 (Good fit, MSWD < 2.29)
Plateau K/Ca = 0.2700
Plateau K/Cl = 1853.0000
% radiogenic (plateau norm.) = 17.3430
Steps 8 of 14 (750,825,900,975,1050,1125,1175,1225°C)
Isochron Age = 366.3 ± 19.4 ka (±1 sigma, including ±J)
Isochron Age = 366.3 ± 16.9 ka (A Priori Errors, including ±J)
Isochron Age = 366.3 ± 42.8 ka (95% confidence, including ±J)
MSWD = 1.33 (Good fit, MSWD < 2.40)
40Ar/36Ar intercept = 297.0 ± 2.9 (±1 sigma)
40Ar/36Ar intercept = 297.0 ± 2.6 (A Priori)
40Ar/36Ar intercept = 297.0 ± 6.5 (95% confidence)
Steps 8 of 14 (750,825,900,975,1050,1125,1175,1225°C)
-----------------
R15MS026	Fluence monitor = Bodie Hills sanidine @ 9.635 ± 0.003 Ma, equivalent to Fish Canyon sanidine @ 27.642 ± 0.012 Ma with R(FCs/BHs) of 2.88340 ± 0.00089
Temp(°C)	Age(ka)	%40Ar*	K/Ca	K/Cl	moles 40Ar*	%39Ar	40Ar	39Ar	38Ar	37Ar	36Ar
550	244.0±22.4	27.42	0.31	-2551	4.749e-15	0.08	0.117035±0.000278	0.052094±0.000076	0.000653±0.000033	0.087495±0.000400	0.000312±0.000010
625	286.1±12.0	23.94	0.35	-4452	1.198e-14	0.25	0.338075±0.000370	0.112073±0.000109	0.001531±0.000030	0.168489±0.000446	0.000917±0.000011
700	276.1±13.2	16.69	0.3	12176	1.022e-14	0.4	0.413745±0.000224	0.099059±0.000095	0.001559±0.000026	0.170662±0.000576	0.001214±0.000011
775	296.9±16.6	15.63	0.29	-26694	8.943e-15	0.53	0.386555±0.000202	0.080634±0.000086	0.001256±0.000029	0.143747±0.000142	0.001144±0.000011
850	282.1±17.6	12.29	0.25	-40886	7.73e-15	0.64	0.425137±0.000226	0.073385±0.000098	0.001196±0.000026	0.153052±0.000327	0.001305±0.000011
925	276.3±38.3	7.99	0.21	-19623	4.087e-15	0.7	0.345483±0.000241	0.039622±0.000058	0.000715±0.000015	0.100126±0.000304	0.001104±0.000013
1025	276.5±33.0	4.49	0.18	2996	5.352e-15	0.78	0.805016±0.000414	0.051850±0.000061	0.001245±0.000023	0.151025±0.000446	0.002644±0.000014
1125	279.3±39.3	2.42	0.09	1210	5.798e-15	0.86	1.616291±0.000747	0.055729±0.000080	0.001934±0.000028	0.310263±0.000622	0.005424±0.000018
1200	461.5±52.9	2.22	0.02	1047	1.237e-14	0.97	3.758967±0.001847	0.073138±0.000089	0.003628±0.000027	2.052004±0.004644	0.013014±0.000029
1300	807.3±102.3	3.99	0.03	1471	5.224e-15	1	0.883897±0.000449	0.017533±0.000036	0.000826±0.000024	0.331645±0.001565	0.002965±0.000015
Packet IRR337-DT, Experiment #15Z0171, 0.1559 g Basalt, all errors ±1 sigma
J = 0.000219355709596±0.000000290448277
40Ar* is radiogenic argon, isotopes in volts (1.48e-13 moles/volt), corrected for blank, background, discrimination, and decay
Calculated bulk K/Ca = 9.333e-2 ± 5.4471e-2, Calculated K2O = 1.09%wt., Calculated CaO = 14.26%wt., Calculated Cl = 0.2ppm
Total Gas Age = 313.3 ± 9.0 ka
Weighted Mean Plateau Age = 280.4 ± 6.5 ka (±1 sigma, including ±J), 86.4% 39Ar released
Weighted Mean Plateau Age = 280.4 ± 6.5 ka (A priori, including ±J), 86.4% 39Ar released
Weighted Mean Plateau Age = 280.4 ± 11.3 ka (95% confidence, including ±J)
MSWD = 0.57 (Good fit, MSWD < 2.29)
Steps 8 of 10 (550,625,700,775,850,925,1025,1125°C)
Isochron Age = 278.9 ± 8.9 ka (±1 sigma, including ±J)
Isochron Age = 278.9 ± 8.9 ka (A Priori Errors, including ±J)
Isochron Age = 278.9 ± 21.1 ka (95% confidence, including ±J)
MSWD = 0.71 (Good fit, MSWD < 2.40)
40Ar/36Ar intercept = 295.6 ± 1.0 (±1 sigma)
40Ar/36Ar intercept = 295.6 ± 1.0 (A Priori)
40Ar/36Ar intercept = 295.6 ± 2.4 (95% confidence)
Steps 8 of 10 (550,625,700,775,850,925,1025,1125°C)
-----------------
R15TS202	Fluence monitor = Bodie Hills sanidine @ 9.635 ± 0.003 Ma, equivalent to Fish Canyon sanidine @ 27.642 ± 0.012 Ma with R(FCs/BHs) of 2.88340 ± 0.00089
Temp(°C)	Age(ka)	%40Ar*	K/Ca	K/Cl	moles 40Ar*	∑%39Ar	40Ar	39Ar	38Ar	37Ar	36Ar
550	272.5±66.2	9.27	0.39	-2836	1.649e-15	0.02	0.120238±0.000234	0.016600±0.000056	0.000263±0.000018	0.022446±0.000502	0.000375±0.000009
625	243.7±26.8	10.71	0.39	-6307	4.158e-15	0.08	0.262279±0.000443	0.046819±0.000100	0.000733±0.000020	0.062221±0.001201	0.000810±0.000010
700	236.9±16.6	12.72	0.41	-13640	7.346e-15	0.18	0.390280±0.000251	0.085070±0.000099	0.001309±0.000028	0.108367±0.001308	0.001183±0.000012
775	254.8±14.3	13.75	0.37	12357	8.257e-15	0.29	0.405817±0.000279	0.088899±0.000077	0.001423±0.000032	0.127048±0.000467	0.001220±0.000011
850	235.6±15.6	13.13	0.34	8606	7.638e-15	0.4	0.393133±0.000249	0.088950±0.000098	0.001432±0.000026	0.138955±0.000883	0.001194±0.000011
925	222.4±24.0	10.54	0.31	6798	5.707e-15	0.49	0.365945±0.000327	0.070434±0.000145	0.001180±0.000045	0.118985±0.001019	0.001141±0.000014
1000	175.0±19.2	7.55	0.27	-31934	4.167e-15	0.57	0.372705±0.000213	0.065352±0.000093	0.001071±0.000040	0.127705±0.000593	0.001202±0.000010
1075	219.1±18.4	10.04	0.26	-14537	6.144e-15	0.67	0.413375±0.000315	0.076962±0.000099	0.001228±0.000020	0.157076±0.000731	0.001302±0.000012
1125	228.5±25.4	9.39	0.23	98953	5.088e-15	0.74	0.366013±0.000280	0.061142±0.000097	0.001019±0.000025	0.136900±0.000925	0.001161±0.000013
1175	201.7±38.8	4.17	0.11	2139	3.652e-15	0.8	0.591791±0.000337	0.049807±0.000092	0.001118±0.000034	0.237597±0.001253	0.001986±0.000016
1250	252.3±21.1	5.27	0.05	4970	1.346e-14	0.99	1.724700±0.000592	0.147339±0.000135	0.003133±0.000026	1.576193±0.004315	0.005971±0.000024
1300	690.4±136.8	11.53	0.03	2146	2.889e-15	1	0.169307±0.000266	0.011637±0.000065	0.000276±0.000023	0.238988±0.000417	0.000574±0.000013
Packet IRR338-EL, Experiment #15Z0241, 0.1492 g Basalt, all errors ±1 sigma
J = 0.000224874942503±2.8379E-07
40Ar* is radiogenic argon, isotopes in volts (1.48e-13 moles/volt), corrected for blank, background, discrimination, and decay
Calculated bulk K/Ca = 0.139 ± 7.529e-2, Calculated K2O = 1.37%wt., Calculated CaO = 12.10%wt., Calculated Cl = 0.1ppm
Total Gas Age = 238.3 ± 7.0 ka
Weighted Mean Plateau Age = 231.2 ± 7.4 ka (±1 sigma, including ±J), 99.7% 39Ar released
Weighted Mean Plateau Age = 231.2 ± 6.2 ka (a priori, including ±J), 99.7% 39Ar released
Weighted Mean Plateau Age = 231.2 ± 16.3 ka (95% confidence, including ±J)
MSWD = 1.43 (Good fit, MSWD < 2.05)
Steps 11 of 13 (550,625,700,775,850,925,1000,1075,1125,1175,1250°C)
Isochron Age = 229.6 ± 20.3 ka (±1 sigma, including ±J)
Isochron Age = 229.6 ± 15.9 ka (a priori Errors, including ±J)
Isochron Age = 229.6 ± 45.1 ka (95% confidence, including ±J)
MSWD = 1.63 (Good fit, MSWD < 2.11)
40Ar/36Ar intercept = 295.6 ± 2.6 (±1 sigma)
40Ar/36Ar intercept = 295.6 ± 2.0 (a priori)
40Ar/36Ar intercept = 295.6 ± 5.8 (95% confidence)
Steps 11 of 13 (550,625,700,775,850,925,1000,1075,1125,1175,1250°C)
-----------------
R17AC125	Fluence monitor = Bodie Hills sanidine @ 9.7970 ± 0.0031 Ma, equivalent to Fish Canyon sanidine @ 28.1053 ± 0.0124 Ma with R(FCs/BHs) of 2.88340 ± 0.00089
Temp(°C)	Age(ka)	%40Ar*	K/Ca	K/Cl	moles 40Ar*	%39Ar	40Ar	39Ar	38Ar	37Ar	36Ar
550	805.4±87.9	53.91	0.38	-933	2.429e-15	0.01	0.063344±0.000492	0.016541±0.000067	0.000160±0.000023	0.023082±0.000409	0.000104±0.000012
625	711.6±51.1	33.63	0.37	-581	4.533e-15	0.05	0.189505±0.000962	0.034939±0.000091	0.000281±0.000028	0.049102±0.000424	0.000435±0.000015
700	722.8±16.4	30.6	0.36	-3810	1.534e-14	0.15	0.704837±0.000582	0.116419±0.000166	0.001709±0.000058	0.169512±0.001427	0.001686±0.000016
775	723.1±21.0	27.63	0.37	-15434	1.274e-14	0.23	0.648353±0.000414	0.096663±0.000124	0.001540±0.000044	0.138107±0.000824	0.001610±0.000017
850	778.1±23.9	27.87	0.36	-56594	1.293e-14	0.31	0.651896±0.000406	0.091117±0.000149	0.001488±0.000052	0.134370±0.000633	0.001612±0.000019
925	707.6±26.4	23.97	0.28	-14598	1.083e-14	0.39	0.635194±0.000425	0.083976±0.000121	0.001385±0.000031	0.154842±0.000870	0.001661±0.000019
1000	747.9±23.3	23.67	0.23	-4768	1.236e-14	0.47	0.734277±0.000384	0.090728±0.000132	0.001466±0.000035	0.207373±0.001672	0.001935±0.000018
1075	718.8±21.5	25.25	0.21	-21981	1.476e-14	0.57	0.821329±0.000370	0.112682±0.000142	0.001849±0.000051	0.274814±0.001363	0.002133±0.000021
1125	702.8±25.5	20.18	0.2	5117	1.194e-14	0.65	0.831966±0.000434	0.093288±0.000162	0.001725±0.000033	0.243084±0.001608	0.002292±0.000020
1175	760.5±18.5	19.42	0.11	3068	2.678e-14	0.82	1.938635±0.000714	0.193569±0.000180	0.003812±0.000054	0.885594±0.002552	0.005481±0.000030
1225	797.1±29.9	10.38	0.04	4961	2.431e-14	0.97	3.290661±0.000919	0.168611±0.000219	0.004256±0.000063	2.118110±0.004211	0.010472±0.000041
1300	910.4±93.2	9.94	0.05	-2106	4.543e-15	0.99	0.642543±0.000340	0.027558±0.000060	0.000676±0.000020	0.305854±0.001203	0.002024±0.000022
1375	808.3±225.4	8.02	0.04	-1946	1.017e-15	1	0.178240±0.000210	0.006960±0.000042	0.000181±0.000015	0.096355±0.000281	0.000576±0.000013
Packet IRR364-YF, Experiment #17Z0186, 0.1519 g Basalt, all errors ±1 sigma
J = 0.000216142031 ± 0.000000343190	2017-09-28
40Ar* is radiogenic argon, isotopes in volts (7.12e-14 moles/volt), corrected for blank, background, discrimination, and decay
Calculated bulk K/Ca = 0.123 ± 6.141e-2, Calculated K2O = 0.94%wt., Calculated CaO = 9.35%wt., Calculated Cl = -4.5e-2ppm
Total Gas Age = 749.5 ± 8.2 ka
Weighted Mean Plateau Age = 738.5 ± 7.3 ka (±1 sigma, including ±J), 100.0% 39Ar released
Weighted Mean Plateau Age = 738.5 ± 7.3 ka (A priori, including ±J), 100.0% 39Ar released
Weighted Mean Plateau Age = 738.5 ± 16.0 ka (95% confidence, including ±J)
MSWD = 1.51 (Good fit, MSWD < 1.94)
Plateau K/Ca = 0.219
Plateau K/Cl = -8341
% radiogenic (plateau norm.) = 22.6
Steps 13 of 13 (550,625,700,775,850,925,1000,1075,1125,1175,1225,1300,1375°C)
Isochron Age = 698.1 ± 16.0 ka (±1 sigma, including ±J)
Isochron Age = 698.1 ± 16.0 ka (A Priori Errors, including ±J)
Isochron Age = 698.1 ± 35.7 ka (95% confidence, including ±J)
MSWD = 0.91 (Good fit, MSWD < 1.99)
40Ar/36Ar intercept = 303.2 ± 1.7 (±1 sigma)
40Ar/36Ar intercept = 303.2 ± 1.7 (A Priori)
40Ar/36Ar intercept = 303.2 ± 3.7 (95% confidence)
Steps 13 of 13 (550,625,700,775,850,925,1000,1075,1125,1175,1225,1300,1375°C)
-----------------
R16MS053	Fluence monitor = Bodie Hills sanidine @ 9.7970 ± 0.0031 Ma, equivalent to Fish Canyon sanidine @ 28.1053 ± 0.0124 Ma with R(FCs/BHs) of 2.88340 ± 0.00089
Temp(°C)	Age(ka)	%40Ar*	K/Ca	K/Cl	moles 40Ar*	%39Ar	40Ar	39Ar	38Ar	37Ar	36Ar
550	584.3±96.9	8.07	0.24	-255	1.945e-15	0.02	0.336405±0.001343	0.018391±0.000084	0.000128±0.000046	0.040521±0.000350	0.001047±0.000014
625	404.5±26.4	19.14	0.26	-3197	5.255e-15	0.1	0.386046±0.000813	0.072257±0.000123	0.001051±0.000058	0.143895±0.000454	0.001086±0.000016
700	425.7±21.4	19.72	0.25	-8488	7.032e-15	0.2	0.501264±0.000534	0.091893±0.000158	0.001418±0.000092	0.196399±0.000629	0.001403±0.000016
775	355.3±25.6	13.98	0.23	67033	4.446e-15	0.27	0.447058±0.000256	0.069615±0.000130	0.001164±0.000068	0.161295±0.001566	0.001333±0.000015
850	357.6±29.8	11.61	0.23	47048	4.165e-15	0.34	0.504113±0.000337	0.064805±0.000110	0.001140±0.000041	0.145861±0.000635	0.001533±0.000016
950	429.4±33.0	12.39	0.18	-5915	5.419e-15	0.42	0.614735±0.000528	0.070236±0.000131	0.001214±0.000028	0.200974±0.001362	0.001860±0.000019
1050	463.9±28.7	13.82	0.15	-5463	5.821e-15	0.5	0.591908±0.000497	0.069868±0.000121	0.001188±0.000069	0.242901±0.001434	0.001777±0.000017
1125	427.6±30.2	12.36	0.17	3049	6.079e-15	0.58	0.691082±0.000414	0.079144±0.000110	0.001536±0.000067	0.247445±0.000753	0.002098±0.000020
1200	471.8±17.6	9.86	0.06	2894	2.093e-14	0.85	2.983309±0.001162	0.247884±0.000197	0.005357±0.000168	2.133259±0.006987	0.009606±0.000034
1275	515.2±26.2	9.75	0.04	24160	1.194e-14	0.99	1.720551±0.000669	0.130031±0.000174	0.002748±0.000078	1.889636±0.004140	0.005731±0.000026
1400	889.4±234.6	5.71	0.02	-235	1.178e-15	1	0.289817±0.000233	0.007478±0.000056	0.000139±0.000021	0.169311±0.001234	0.000963±0.000015
Packet IRR358-TM, Experiment #17Z0010, 0.1351 g Basalt , all errors ±1 sigma
J = 0.000219091874 ± 0.000000296880	2017-01-11
40Ar* is radiogenic argon, isotopes in volts (7.12e-14 moles/volt), corrected for blank, background, discrimination, and decay
Calculated bulk K/Ca = 8.642e-2 ± 4.521e-2, Calculated K2O = 0.85%wt., Calculated CaO = 12.03%wt., Calculated Cl = -4.4e-2ppm
Total Gas Age = 449.1 ± 8.6 ka
Weighted Mean Plateau Age = 435.6 ± 16.5 ka (±1 sigma, including ±J), 100.0% 39Ar released
Weighted Mean Plateau Age = 435.6 ± 8.4 ka (A priori, including ±J), 100.0% 39Ar released
Weighted Mean Plateau Age = 435.6 ± 37.4 ka (95% confidence, including ±J)
MSWD = 3.90 (Poor fit, MSWD > 2.05)
Plateau K/Ca = 0.145
Plateau K/Cl = 1e+4
% radiogenic (plateau norm.) = 12.6
Steps 11 of 11 (550,625,700,775,850,950,1050,1125,1200,1275,1400°C)
Isochron Age = 324.7 ± 29.3 ka (±1 sigma, including ±J)
Isochron Age = 324.7 ± 23.8 ka (A Priori Errors, including ±J)
Isochron Age = 324.7 ± 67.5 ka (95% confidence, including ±J)
MSWD = 1.51 (Good fit, MSWD < 2.11)
40Ar/36Ar intercept = 309.2 ± 2.6 (±1 sigma)
40Ar/36Ar intercept = 309.2 ± 2.1 (A Priori)
40Ar/36Ar intercept = 309.2 ± 6.1 (95% confidence)
Steps 11 of 11 (550,625,700,775,850,950,1050,1125,1200,1275,1400°C)
-----------------
R16MS063	Fluence monitor = Bodie Hills sanidine @ 9.7970 ± 0.0031 Ma, equivalent to Fish Canyon sanidine @ 28.1053 ± 0.0124 Ma with R(FCs/BHs) of 2.88340 ± 0.00089
Temp(°C)	Age(ka)	%40Ar*	K/Ca	K/Cl	moles 40Ar*	%39Ar	40Ar	39Ar	38Ar	37Ar	36Ar
550	275.1±86.3	6.14	0.28	10304	1.125e-15	0.02	0.123788±0.000143	0.011321±0.000030	0.000227±0.000025	0.021323±0.000436	0.000395±0.000008
625	523.4±28.6	13.98	0.28	-2924	8.82e-15	0.11	0.426467±0.000204	0.046655±0.000063	0.000776±0.000021	0.088121±0.000528	0.001253±0.000011
700	494.6±23.0	15.98	0.27	14950	1.11e-14	0.22	0.469591±0.000221	0.062149±0.000068	0.001084±0.000018	0.120206±0.000385	0.001355±0.000012
750	475.1±22.8	20	0.24	-8915	9.622e-15	0.33	0.325115±0.000219	0.056082±0.000091	0.000876±0.000037	0.120943±0.000293	0.000905±0.000010
800	521.0±27.9	23.52	0.23	-13888	8.646e-15	0.41	0.248389±0.000162	0.045955±0.000072	0.000711±0.000034	0.105685±0.000302	0.000666±0.000010
850	517.7±31.4	19.45	0.21	32349	6.55e-15	0.48	0.227542±0.000174	0.035038±0.000062	0.000582±0.000013	0.085993±0.000654	0.000638±0.000009
925	524.1±34.8	19.21	0.18	107598	6.949e-15	0.55	0.244481±0.000155	0.036730±0.000049	0.000610±0.000026	0.106526±0.000669	0.000691±0.000010
1000	563.1±34.4	19.18	0.16	7491	7.03e-15	0.61	0.247646±0.000182	0.034588±0.000055	0.000602±0.000038	0.111936±0.000486	0.000702±0.000010
1050	460.3±45.1	15.17	0.17	-188473	4.491e-15	0.66	0.200120±0.000186	0.027034±0.000045	0.000463±0.000030	0.085539±0.000651	0.000593±0.000010
1100	513.4±33.0	13.54	0.18	-6877	7.188e-15	0.74	0.358687±0.000181	0.038791±0.000051	0.000682±0.000023	0.114763±0.000379	0.001071±0.000010
1150	538.2±42.5	7.76	0.11	1640	7.573e-15	0.81	0.659675±0.000254	0.039034±0.000059	0.001000±0.000023	0.183642±0.000465	0.002090±0.000013
1200	562.5±35.8	6.85	0.05	50321	1.257e-14	0.92	1.240309±0.000387	0.062233±0.000081	0.001561±0.000034	0.638136±0.001452	0.004049±0.000018
1250	718.4±64.7	6.98	0.03	-8099	7.955e-15	0.98	0.770412±0.000291	0.031031±0.000051	0.000854±0.000056	0.592071±0.000785	0.002567±0.000016
1350	767.8±123.7	6.43	0.03	-1638	2.761e-15	1	0.290101±0.000135	0.010067±0.000031	0.000280±0.000038	0.177215±0.000614	0.000959±0.000010
Packet IRR354-QC, Experiment #16Z0247, 0.1368 g Basalt, all errors ±1 sigma
J = 0.000226826729064 ± 3.22902E-07	2016-08-24
40Ar* is radiogenic argon, isotopes in volts (1.48e-13 moles/volt), corrected for blank, background, discrimination, and decay
Calculated bulk K/Ca = 0.110 ± 4.175e-2, Calculated K2O = 0.98%wt., Calculated CaO = 10.94%wt., Calculated Cl = -1.0e-2ppm
Total Gas Age = 529.2 ± 9.8 ka
Weighted Mean Plateau Age = 512.833 ± 9.251 ka (±1 sigma, including ±J), 90.305% 39Ar released
Weighted Mean Plateau Age = 512.833 ± 9.251 ka (A priori, including ±J), 90.305% 39Ar released
Weighted Mean Plateau Age = 512.833 ± 20.396 ka (95% confidence, including ±J)
MSWD = 0.95 (Good fit, MSWD < 2.05)
Plateau K/Ca = 0.1909
Plateau K/Cl = 5821.0000
% radiogenic (plateau norm.) = 15.6235
Steps 11 of 14 (625,700,750,800,850,925,1000,1050,1100,1150,1200°C)
Isochron Age = 482.930 ± 19.535 ka (±1 sigma, including ±J)
Isochron Age = 482.930 ± 19.535 ka (A Priori Errors, including ±J)
Isochron Age = 482.930 ± 42.975 ka (95% confidence, including ±J)
MSWD = 0.74 (Good fit, MSWD < 2.11)
40Ar/36Ar intercept = 301.5 ± 1.7 (±1 sigma)
40Ar/36Ar intercept = 301.5 ± 1.7 (A Priori)
40Ar/36Ar intercept = 301.5 ± 3.8 (95% confidence)
Steps 11 of 14 (625,700,750,800,850,925,1000,1050,1100,1150,1200°C)
-----------------
R15MS024	Fluence monitor = Bodie Hills sanidine @ 9.635 ± 0.003 Ma, equivalent to Fish Canyon sanidine @ 27.642 ± 0.012 Ma with R(FCs/BHs) of 2.88340 ± 0.00089
Temp(°C)	Age(ka)	%40Ar*	K/Ca	K/Cl	moles 40Ar*	%39Ar	40Ar	39Ar	38Ar	37Ar	36Ar
550	331.4±25.9	16.47	0.52	-829	5.164e-15	0.06	0.211793±0.000816	0.042606±0.000237	0.000452±0.000027	0.043340±0.000176	0.000611±0.000009
625	293.0±24.4	14.35	0.46	-896	6.104e-15	0.13	0.287355±0.001047	0.056961±0.000294	0.000633±0.000043	0.064412±0.000318	0.000851±0.000011
700	263.2±21.0	11.61	0.4	-2647	6.505e-15	0.22	0.378664±0.000588	0.067582±0.000181	0.000992±0.000035	0.088201±0.000268	0.001157±0.000012
775	239.2±21.2	10.65	0.4	-6398	4.751e-15	0.29	0.301537±0.000253	0.054325±0.000079	0.000850±0.000019	0.071481±0.000309	0.000932±0.000010
850	214.7±19.4	8.7	0.38	-6611	4.261e-15	0.36	0.330853±0.000193	0.054280±0.000083	0.000871±0.000017	0.075520±0.000205	0.001043±0.000009
950	195.6±26.8	7.01	0.27	162339	3.499e-15	0.43	0.337241±0.000215	0.048945±0.000077	0.000845±0.000022	0.094156±0.000238	0.001088±0.000011
1050	191.6±30.7	7.38	0.24	32426	4.274e-15	0.51	0.391382±0.000269	0.061056±0.000118	0.001043±0.000038	0.134992±0.000401	0.001264±0.000016
1125	203.1±19.2	7.56	0.25	9685	5.578e-15	0.61	0.498737±0.000221	0.075146±0.000075	0.001316±0.000022	0.155551±0.000298	0.001604±0.000012
1200	185.5±10.8	5.35	0.1	3119	1.4e-14	0.88	1.766837±0.000519	0.206983±0.000145	0.004087±0.000037	1.097059±0.001238	0.005967±0.000017
1275	237.2±22.2	5.09	0.08	6429	7.572e-15	0.99	1.004744±0.000281	0.087631±0.000072	0.001827±0.000024	0.598092±0.000791	0.003395±0.000016
1350	375.3±147.4	7.26	0.07	-684	8.48e-16	1	0.078928±0.000146	0.006205±0.000038	0.000090±0.000019	0.046082±0.000181	0.000261±0.000008
Packet IRR348-MB, Experiment #16Z0081, 0.1527 g Basalt, all errors ±1 sigma
J = 0.000224155904602 ± 2.20982E-07
40Ar* is radiogenic argon, isotopes in volts (1.48e-13 moles/volt), corrected for blank, background, discrimination, and decay
Calculated bulk K/Ca = 0.162 ± 8.409e-2, Calculated K2O = 1.27%wt., Calculated CaO = 9.59%wt., Calculated Cl = -0.1ppm
Total Gas Age = 224.9 ± 6.3 ka
Weighted Mean Plateau Age = 203.9 ± 8.3 ka (±1 sigma, including ±J), 78.0% 39Ar released
Weighted Mean Plateau Age = 203.9 ± 7.0 ka (A priori, including ±J), 78.0% 39Ar released
Weighted Mean Plateau Age = 203.9 ± 20.2 ka (95% confidence, including ±J)
MSWD = 1.40 (Good fit, MSWD < 2.29)
Plateau K/Ca = 0.1960
Plateau K/Cl = 1.8774e+4
% radiogenic (plateau norm.) = 6.7492
Steps 8 of 11 (775,850,950,1050,1125,1200,1275,1350°C)
Isochron Age = 206.4 ± 38.7 ka (±1 sigma, including ±J)
Isochron Age = 206.4 ± 30.6 ka (A Priori Errors, including ±J)
Isochron Age = 206.4 ± 89.3 ka (95% confidence, including ±J)
MSWD = 1.60 (Good fit, MSWD < 2.40)
40Ar/36Ar intercept = 295.2 ± 3.8 (±1 sigma)
40Ar/36Ar intercept = 295.2 ± 3.0 (A Priori)
40Ar/36Ar intercept = 295.2 ± 8.8 (95% confidence)
Steps 8 of 11 (775,850,950,1050,1125,1200,1275,1350°C)
-----------------
R14TRO158	Fluence monitor = Bodie Hills sanidine @ 9.7970 ± 0.0031 Ma, equivalent to Fish Canyon sanidine @ 28.1053 ± 0.0124 Ma with R(FCs/BHs) of 2.88340 ± 0.00089
Temp(°C)	Age(ka)	%40Ar*	K/Ca	K/Cl	moles 40Ar*	%39Ar	40Ar	39Ar	38Ar	37Ar	36Ar
550	167.9±55.7	6.88	0.19	-1984	1.007e-15	0.05	0.205698±0.000313	0.033535±0.000075	0.000490±0.000023	0.091463±0.001091	0.000667±0.000016
625	214.1±30.3	11.36	0.17	-5816	2.26e-15	0.13	0.279667±0.000337	0.059034±0.000108	0.000892±0.000043	0.181305±0.000916	0.000881±0.000015
700	184.5±22.2	9.26	0.13	-4589	3.294e-15	0.27	0.500340±0.000342	0.099927±0.000146	0.001513±0.000038	0.389635±0.001161	0.001630±0.000018
775	203.0±24.1	9.61	0.13	-14228	3.142e-15	0.4	0.459575±0.000354	0.086629±0.000139	0.001380±0.000040	0.338400±0.001225	0.001486±0.000017
850	201.4±27.3	8.28	0.15	-12721	2.511e-15	0.5	0.426366±0.000315	0.069751±0.000096	0.001144±0.000035	0.242466±0.001128	0.001378±0.000016
925	249.4±41.0	7.34	0.12	-3469	2.225e-15	0.57	0.425976±0.000355	0.049937±0.000097	0.000847±0.000037	0.210657±0.001327	0.001381±0.000017
1000	262.9±50.4	6.02	0.1	-8320	1.803e-15	0.62	0.418118±0.000325	0.038152±0.000099	0.000733±0.000025	0.204523±0.000890	0.001373±0.000016
1100	246.9±41.1	5.5	0.11	-23158	2.608e-15	0.7	0.667006±0.000313	0.059147±0.000120	0.001168±0.000049	0.288004±0.000914	0.002192±0.000020
1175	314.1±48.5	4.7	0.06	1119	4.062e-15	0.81	1.214594±0.000626	0.072588±0.000109	0.001969±0.000035	0.591132±0.003088	0.004043±0.000029
1225	350.4±37.7	4.65	0.03	3497	7.134e-15	0.97	2.157878±0.000693	0.115075±0.000142	0.002988±0.000043	2.041022±0.002896	0.007465±0.000034
1300	491.6±114.7	3.71	0.02	1018	1.913e-15	1	0.725183±0.000468	0.022132±0.000078	0.000834±0.000052	0.595863±0.002424	0.002506±0.000021
Packet IRR362-XC, Experiment #17Z0150, 0.1520 g Basalt, all errors ±1 sigma
J = 0.000220095950 ± 2.4960E-07	2017-07-24
40Ar* is radiogenic argon, isotopes in volts (7.12e-14 moles/volt), corrected for blank, background, discrimination, and decay
Calculated bulk K/Ca = 7.121e-2 ± 3.216e-2, Calculated K2O = 0.58%wt., Calculated CaO = 9.89%wt., Calculated Cl = 3.4e-2ppm
Total Gas Age = 253.9 ± 11.6 ka
Weighted Mean Plateau Age = 225.7 ± 17.1 ka (±1 sigma, including ±J), 100.0% 39Ar released
Weighted Mean Plateau Age = 225.7 ± 10.4 ka (A priori, including ±J), 100.0% 39Ar released
Weighted Mean Plateau Age = 225.7 ± 38.7 ka (95% confidence, including ±J)
MSWD = 2.71 (Poor fit, MSWD > 2.05)
Plateau K/Ca = 0.109
Plateau K/Cl = -6173
% radiogenic (plateau norm.) = 7.3
Steps 11 of 11 (550,625,700,775,850,925,1000,1100,1175,1225,1300°C)
Isochron Age = 144.6 ± 19.6 ka (±1 sigma, including ±J)
Isochron Age = 144.6 ± 19.6 ka (A Priori Errors, including ±J)
Isochron Age = 144.6 ± 45.2 ka (95% confidence, including ±J)
MSWD = 0.19 (Good fit, MSWD < 2.11)
40Ar/36Ar intercept = 306.8 ± 1.7 (±1 sigma)
40Ar/36Ar intercept = 306.8 ± 1.7 (A Priori)
40Ar/36Ar intercept = 306.8 ± 3.9 (95% confidence)
Steps 11 of 11 (550,625,700,775,850,925,1000,1100,1175,1225,1300°C)
-----------------
R17AC139	Fluence monitor = Bodie Hills sanidine @ 9.7970 ± 0.0031 Ma, equivalent to Fish Canyon sanidine @ 28.1053 ± 0.0124 Ma with R(FCs/BHs) of 2.88340 ± 0.00089
Temp(°C)	Age(ka)	%40Ar*	K/Ca	K/Cl	moles 40Ar*	%39Ar	40Ar	39Ar	38Ar	37Ar	36Ar
550	203.5±37.5	8.42	0.21	-1361	1.989e-15	0.06	0.332019±0.000916	0.053879±0.000119	0.000732±0.000036	0.133214±0.000674	0.001056±0.000017
625	203.6±24.9	11.24	0.24	-2317	3.099e-15	0.16	0.387623±0.000947	0.083903±0.000111	0.001167±0.000035	0.183829±0.000978	0.001204±0.000017
700	202.5±19.1	9.11	0.22	-3279	4.808e-15	0.31	0.741979±0.000674	0.130901±0.000181	0.001979±0.000083	0.317700±0.002044	0.002348±0.000021
775	192.5±29.3	6.81	0.22	-12140	2.619e-15	0.4	0.540915±0.000382	0.075014±0.000142	0.001279±0.000050	0.175566±0.000970	0.001738±0.000019
850	197.0±39.1	6.15	0.22	-4588	1.934e-15	0.46	0.442440±0.000327	0.054116±0.000107	0.000924±0.000040	0.128437±0.001517	0.001427±0.000018
950	194.9±40.7	4.75	0.14	-40879	1.85e-15	0.52	0.547779±0.000337	0.052363±0.000097	0.001014±0.000028	0.199202±0.000591	0.001803±0.000018
1050	154.6±37.2	3.85	0.13	6663	1.856e-15	0.59	0.678602±0.000395	0.066266±0.000119	0.001328±0.000048	0.259507±0.001091	0.002258±0.000021
1150	202.4±29.6	4.55	0.14	1645	3.904e-15	0.72	1.206655±0.000567	0.106447±0.000174	0.002406±0.000053	0.393983±0.001431	0.003968±0.000027
1200	235.8±22.3	4.83	0.05	6105	8.664e-15	0.95	2.521366±0.001142	0.203585±0.000198	0.004366±0.000082	1.957400±0.003695	0.008587±0.000036
1250	366.3±74.4	3.38	0.03	-5708455	2.544e-15	0.99	1.059300±0.000746	0.038754±0.000094	0.001168±0.000040	0.768487±0.001023	0.003644±0.000024
1325	1341.6±368.7	10.82	0.02	-683	9.873e-16	1	0.128199±0.000169	0.004113±0.000033	0.000102±0.000021	0.091027±0.000429	0.000408±0.000013
1450	1555.7±776.3	9.69	0.02	2348	5.21e-16	1	0.075560±0.000157	0.001876±0.000025	0.000072±0.000019	0.047406±0.000434	0.000242±0.000012
Packet IRR364-YG, Experiment #17Z0188, 0.1414 g Basalt, all errors ±1 sigma
J = 0.000217031197 ± 0.000000378524	2017-10-01
40Ar* is radiogenic argon, isotopes in volts (7.12e-14 moles/volt), corrected for blank, background, discrimination, and decay
Calculated bulk K/Ca = 9.781e-2 ± 4.665e-2, Calculated K2O = 0.77%wt., Calculated CaO = 9.70%wt., Calculated Cl = -3.2e-2ppm
Total Gas Age = 220.5 ± 9.9 ka
Weighted Mean Plateau Age = 196.9 ± 10.3 ka (±1 sigma, including ±J), 71.6% 39Ar released
Weighted Mean Plateau Age = 196.9 ± 10.3 ka (A priori, including ±J), 71.6% 39Ar released
Weighted Mean Plateau Age = 196.9 ± 25.3 ka (95% confidence, including ±J)
MSWD = 0.22 (Good fit, MSWD < 2.29)
Plateau K/Ca = 0.192
Plateau K/Cl = -5426
% radiogenic (plateau norm.) = 7.1
Steps 8 of 12 (550,625,700,775,850,950,1050,1150°C)
Isochron Age = 213.8 ± 31.2 ka (±1 sigma, including ±J)
Isochron Age = 213.8 ± 31.2 ka (A Priori Errors, including ±J)
Isochron Age = 213.8 ± 70.5 ka (95% confidence, including ±J)
MSWD = 0.21 (Good fit, MSWD < 2.40)
40Ar/36Ar intercept = 296.6 ± 3.3 (±1 sigma)
40Ar/36Ar intercept = 296.6 ± 3.3 (A Priori)
40Ar/36Ar intercept = 296.6 ± 7.5 (95% confidence)
Steps 8 of 12 (550,625,700,775,850,950,1050,1150°C)
-----------------
R17TS234	Fluence monitor = Bodie Hills sanidine @ 9.7970 ± 0.0031 Ma, equivalent to Fish Canyon sanidine @ 28.1053 ± 0.0124 Ma with R(FCs/BHs) of 2.88340 ± 0.00089
Temp(°C)	Age(ka)	%40Ar*	K/Ca	K/Cl	moles 40Ar*	%39Ar	40Ar	39Ar	38Ar	37Ar	36Ar
550	318.1±73.2	14.05	0.36	-166	1.757e-15	0.03	0.175800±0.001510	0.030581±0.000147	-0.000291±0.000069	0.044571±0.000694	0.000519±0.000018
625	437.4±47.6	19.1	0.32	-242	4.113e-15	0.09	0.302633±0.001876	0.052054±0.000162	-0.000083±0.000048	0.084519±0.000754	0.000844±0.000020
700	348.4±31.7	9.75	0.25	-711	5.174e-15	0.18	0.745935±0.001367	0.082242±0.000134	0.001010±0.000040	0.174870±0.001335	0.002304±0.000022
775	333.0±39.0	10.49	0.26	-1353	3.878e-15	0.25	0.519752±0.000624	0.064489±0.000134	0.000937±0.000071	0.127815±0.000630	0.001594±0.000021
850	330.0±40.4	10.84	0.32	-3326	3.394e-15	0.31	0.440303±0.000400	0.056958±0.000104	0.000923±0.000052	0.093446±0.001141	0.001341±0.000020
925	285.5±41.4	9.23	0.33	-6942	2.606e-15	0.37	0.396941±0.000328	0.050548±0.000122	0.000860±0.000041	0.080941±0.000964	0.001229±0.000018
1000	326.5±43.5	10.25	0.3	-5404	3.217e-15	0.43	0.441344±0.000359	0.054561±0.000098	0.000924±0.000038	0.095727±0.001313	0.001354±0.000020
1075	357.7±26.3	12.7	0.28	-13179	5.965e-15	0.53	0.660277±0.000387	0.092347±0.000131	0.001548±0.000044	0.172658±0.000994	0.001979±0.000021
1125	353.7±23.9	11.34	0.28	16707	7.834e-15	0.66	0.971050±0.000403	0.122649±0.000150	0.002188±0.000055	0.232124±0.001118	0.002948±0.000025
1175	346.1±19.7	8	0.09	3717	1.356e-14	0.9	2.383139±0.000760	0.217603±0.000191	0.004511±0.000053	1.204346±0.002922	0.007681±0.000035
1225	354.9±44.4	3.38	0.03	-12167	5.582e-15	1	2.318726±0.000765	0.088071±0.000158	0.002566±0.000054	1.539774±0.002338	0.007936±0.000031
1300	1313.9±547.8	3.95	0.01	-107	8.854e-16	1	0.314920±0.000339	0.003911±0.000078	0.000098±0.000042	0.261358±0.001361	0.001087±0.000017
Packet IRR364-YI, Experiment #17Z0191, 0.1411 g Basalt, all errors ±1 sigma
J = 0.000218126887 ± 0.000000302682	2017-10-05
40Ar* is radiogenic argon, isotopes in volts (7.12e-14 moles/volt), corrected for blank, background, discrimination, and decay
Calculated bulk K/Ca = 0.117 ± 5.732e-2, Calculated K2O = 0.81%wt., Calculated CaO = 8.54%wt., Calculated Cl = -0.6ppm
Total Gas Age = 351.1 ± 10.2 ka
Weighted Mean Plateau Age = 346.9 ± 9.9 ka (±1 sigma, including ±J), 99.6% 39Ar released
Weighted Mean Plateau Age = 346.9 ± 9.9 ka (A priori, including ±J), 99.6% 39Ar released
Weighted Mean Plateau Age = 346.9 ± 22.3 ka (95% confidence, including ±J)
MSWD = 0.68 (Good fit, MSWD < 2.05)
Plateau K/Ca = 0.219
Plateau K/Cl = -461
% radiogenic (plateau norm.) = 10.0
Steps 11 of 12 (550,625,700,775,850,925,1000,1075,1125,1175,1225°C)
Isochron Age = 345.5 ± 22.5 ka (±1 sigma, including ±J)
Isochron Age = 345.5 ± 22.5 ka (A Priori Errors, including ±J)
Isochron Age = 345.5 ± 50.9 ka (95% confidence, including ±J)
MSWD = 0.73 (Good fit, MSWD < 2.11)
40Ar/36Ar intercept = 298.6 ± 1.8 (±1 sigma)
40Ar/36Ar intercept = 298.6 ± 1.8 (A Priori)
40Ar/36Ar intercept = 298.6 ± 4.0 (95% confidence)
Steps 11 of 12 (550,625,700,775,850,925,1000,1075,1125,1175,1225°C)
-----------------
R16MS073	Fluence monitor = Bodie Hills sanidine @ 9.7970 ± 0.0031 Ma, equivalent to Fish Canyon sanidine @ 28.1053 ± 0.0124 Ma with R(FCs/BHs) of 2.88340 ± 0.00089
Temp(°C)	Age(ka)	%40Ar*	K/Ca	K/Cl	moles 40Ar*	%39Ar	40Ar	39Ar	38Ar	37Ar	36Ar
550	240.1±86.9	8.91	0.17	-1091	7.457e-16	0.03	0.117593±0.000381	0.017490±0.000055	0.000229±0.000042	0.052757±0.000365	0.000374±0.000013
625	258.0±42.7	8.68	0.13	-1666	2.167e-15	0.11	0.348564±0.000745	0.047009±0.000102	0.000701±0.000046	0.187910±0.000840	0.001119±0.000017
700	279.3±34.5	10.09	0.09	1684	3.183e-15	0.21	0.443529±0.000392	0.064295±0.000100	0.001266±0.000049	0.359533±0.001180	0.001437±0.000018
775	237.8±38.6	7.64	0.13	10304	2.022e-15	0.29	0.371881±0.000229	0.047908±0.000087	0.000869±0.000046	0.187623±0.001321	0.001203±0.000015
850	204.7±49.0	4.83	0.15	2530	1.299e-15	0.35	0.378099±0.000308	0.035753±0.000100	0.000759±0.000034	0.123467±0.000357	0.001240±0.000015
950	196.5±52.5	4.13	0.13	7494	1.287e-15	0.41	0.437484±0.000245	0.036908±0.000084	0.000772±0.000038	0.145580±0.000654	0.001446±0.000016
1050	240.0±43.3	6.34	0.15	9320	2.033e-15	0.49	0.450454±0.000277	0.047723±0.000107	0.000917±0.000021	0.163554±0.000853	0.001459±0.000017
1150	183.4±25.2	4.9	0.08	2842	3.565e-15	0.67	1.023667±0.000505	0.109787±0.000140	0.002235±0.000012	0.756090±0.001269	0.003473±0.000022
1200	231.5±23.9	6.52	0.04	7208	6.896e-15	0.95	1.486042±0.000667	0.168999±0.000176	0.003243±0.000058	2.267583±0.007482	0.005289±0.000030
1250	368.5±96.4	4.58	0.02	3820	1.273e-15	0.98	0.390565±0.000300	0.019783±0.000056	0.000527±0.000031	0.525474±0.001844	0.001396±0.000015
1350	723.4±146.2	6.85	0.02	37549	1.587e-15	1	0.325533±0.000214	0.012557±0.000045	0.000364±0.000054	0.317863±0.002022	0.001105±0.000015
Packet IRR357-SQ, Experiment #16Z0329, 0.1312 g Basalt, all errors ±1 sigma
J = 0.000221669907 ± 0.000000258124	2016-12-02
40Ar* is radiogenic argon, isotopes in volts (7.12e-14 moles/volt), corrected for blank, background, discrimination, and decay
Calculated bulk K/Ca = 6.236e-2 ± 3.105e-2, Calculated K2O = 0.57%wt., Calculated CaO = 11.19%wt., Calculated Cl = 9.5e-2ppm
Total Gas Age = 242.1 ± 12.1 ka
Weighted Mean Plateau Age = 228.6 ± 12.0 ka (±1 sigma, including ±J), 98.0% 39Ar released
Weighted Mean Plateau Age = 228.6 ± 12.0 ka (A priori, including ±J), 98.0% 39Ar released
Weighted Mean Plateau Age = 228.6 ± 27.3 ka (95% confidence, including ±J)
MSWD = 0.97 (Good fit, MSWD < 2.11)
Plateau K/Ca = 9.159e-2
Plateau K/Cl = 4899
% radiogenic (plateau norm.) = 6.6
Steps 10 of 11 (550,625,700,775,850,950,1050,1150,1200,1250°C)
Isochron Age = 241.0 ± 57.5 ka (±1 sigma, including ±J)
Isochron Age = 241.0 ± 55.4 ka (A Priori Errors, including ±J)
Isochron Age = 241.0 ± 132.5 ka (95% confidence, including ±J)
MSWD = 1.07 (Good fit, MSWD < 2.19)
40Ar/36Ar intercept = 297.4 ± 5.0 (±1 sigma)
40Ar/36Ar intercept = 297.4 ± 4.8 (A Priori)
40Ar/36Ar intercept = 297.4 ± 11.5 (95% confidence)
Steps 10 of 11 (550,625,700,775,850,950,1050,1150,1200,1250°C)
-----------------
R15MS042	Fluence monitor = Bodie Hills sanidine @ 9.635 ± 0.003 Ma, equivalent to Fish Canyon sanidine @ 27.642 ± 0.012 Ma with R(FCs/BHs) of 2.88340 ± 0.00089
Temp(°C)	Age(ka)	%40Ar*	K/Ca	K/Cl	moles 40Ar*	∑%39Ar	40Ar	39Ar	38Ar	37Ar	36Ar
550	230.9±20.8	17.44	0.49	-637	5.106e-15	0.06	0.197764±0.000704	0.060237±0.000087	0.000491±0.000024	0.065008±0.000472	0.000571±0.000010
600	192.3±15.8	22.07	0.53	-1026	6.637e-15	0.15	0.203182±0.000745	0.094016±0.000147	0.000945±0.000040	0.093830±0.001076	0.000562±0.000012
650	226.1±9.5	28.16	0.53	-2252	1.009e-14	0.28	0.242149±0.000370	0.121601±0.000125	0.001479±0.000025	0.121058±0.000775	0.000622±0.000010
700	236.0±8.8	29.12	0.5	-4135	1.131e-14	0.41	0.262337±0.000189	0.130548±0.000115	0.001701±0.000029	0.137511±0.000591	0.000667±0.000010
750	215.3±9.6	25.55	0.46	-3725	9.58e-15	0.53	0.253327±0.000228	0.121189±0.000101	0.001575±0.000018	0.137761±0.000958	0.000677±0.000010
800	230.6±12.2	25.43	0.39	-4511	7.752e-15	0.62	0.205997±0.000194	0.091590±0.000108	0.001216±0.000019	0.122923±0.000393	0.000554±0.000009
875	236.1±16.8	19.62	0.31	-2566	5.26e-15	0.68	0.181121±0.000212	0.060707±0.000081	0.000791±0.000019	0.102198±0.000470	0.000521±0.000008
950	255.4±23.3	18.55	0.28	-1178	4.64e-15	0.73	0.169040±0.000419	0.049512±0.000088	0.000560±0.000030	0.092887±0.000340	0.000492±0.000010
1050	237.8±17.3	17.37	0.31	-1149	7.198e-15	0.81	0.280076±0.000623	0.082503±0.000097	0.000926±0.000037	0.139616±0.001249	0.000822±0.000012
1125	227.5±19.9	7.41	0.24	-105236	6.896e-15	0.89	0.628812±0.000326	0.082650±0.000092	0.001455±0.000029	0.177224±0.000286	0.002020±0.000014
1200	308.6±34.8	3.98	0.04	1468	8.46e-15	0.97	1.435958±0.000414	0.075319±0.000080	0.002104±0.000027	1.005100±0.002653	0.004948±0.000021
1275	398.0±65.4	4.04	0.05	228783	3.554e-15	0.99	0.594423±0.000323	0.024498±0.000056	0.000690±0.000024	0.278098±0.000859	0.002008±0.000013
1400	687.0±152.6	5.66	0.04	-780	1.955e-15	1	0.233391±0.000142	0.007811±0.000038	0.000202±0.000016	0.094388±0.000118	0.000772±0.000010
Packet IRR340-GF, Experiment #15Z0283, 0.1505 g Basalt, all errors ±1 sigma
J = 0.000223319086450 ± 4.1674E-07
40Ar* is radiogenic argon, isotopes in volts (1.48e-13 moles/volt), corrected for blank, background, discrimination, and decay
Calculated bulk K/Ca = 0.204 ± 8.934e-2, Calculated K2O = 1.70%wt., Calculated CaO = 10.16%wt., Calculated Cl = -0.8ppm
Total Gas Age = 240.6 ± 5.0 ka
Weighted Mean Plateau Age = 226.9 ± 4.3 ka (±1 sigma, including ±J), 89.3% 39Ar released
Weighted Mean Plateau Age = 226.9 ± 4.1 ka (a priori, including ±J), 89.3% 39Ar released
Weighted Mean Plateau Age = 226.9 ± 9.9 ka (95% confidence, including ±J)
MSWD = 1.07 (Good fit, MSWD < 2.11)
Plateau K/Ca = 0.4224
Plateau K/Cl = -1.2090e+4
% radiogenic (plateau norm.) = 22.2830
Steps 10 of 13 (550,600,650,700,750,800,875,950,1050,1125°C)
Isochron Age = 222.3 ± 8.9 ka (±1 sigma, including ±J)
Isochron Age = 222.3 ± 8.1 ka (a priori Errors, including ±J)
Isochron Age = 222.3 ± 19.9 ka (95% confidence, including ±J)
MSWD = 1.22 (Good fit, MSWD < 2.19)
40Ar/36Ar intercept = 296.9 ± 2.9 (±1 sigma)
40Ar/36Ar intercept = 296.9 ± 2.6 (a priori)
40Ar/36Ar intercept = 296.9 ± 6.4 (95% confidence)
Steps 10 of 13 (550,600,650,700,750,800,875,950,1050,1125°C)
-----------------
R15MS001A	Fluence monitor = Bodie Hills sanidine @ 9.635 ± 0.003 Ma, equivalent to Fish Canyon sanidine @ 27.642 ± 0.012 Ma with R(FCs/BHs) of 2.88340 ± 0.00089
Temp(°C)	Age(ka)	%40Ar*	K/Ca	K/Cl	moles 40Ar*	%39Ar	40Ar	39Ar	38Ar	37Ar	36Ar
550	149.6±17.4	10.36	0.19	-6747	3.263e-15	0.13	0.212904±0.000413	0.058820±0.000121	0.000860±0.000015	0.165787±0.000605	0.000692±0.000008
625	136.5±14.1	8.91	0.22	-13107	3.587e-15	0.29	0.272036±0.000315	0.070847±0.000079	0.001068±0.000021	0.167736±0.000422	0.000885±0.000008
675	117.0±21.9	5.01	0.22	-7474	2.083e-15	0.4	0.281017±0.000259	0.047998±0.000080	0.000775±0.000024	0.113019±0.000409	0.000935±0.000009
750	121.5±23.8	4.63	0.22	-12092	2.229e-15	0.51	0.325052±0.000193	0.049451±0.000066	0.000831±0.000016	0.118787±0.000544	0.001082±0.000010
825	137.4±18.5	4.96	0.17	-7773	3.285e-15	0.65	0.447601±0.000216	0.064491±0.000072	0.001086±0.000027	0.201592±0.000605	0.001496±0.000010
900	152.2±26.4	4.08	0.11	11520	2.202e-15	0.74	0.364489±0.000288	0.039070±0.000075	0.000753±0.000020	0.182319±0.000561	0.001234±0.000009
1000	126.8±51.8	2.34	0.09	-3205	1.269e-15	0.8	0.366612±0.000368	0.027038±0.000097	0.000549±0.000014	0.151309±0.000367	0.001254±0.000012
1100	112.5±34.6	2.06	0.09	10522	1.79e-15	0.89	0.586728±0.000252	0.042981±0.000064	0.000952±0.000018	0.248796±0.000762	0.002014±0.000012
1200	64.7±66.4	0.41	0.02	530	5.428e-16	0.94	0.883979±0.000269	0.023035±0.000050	0.001058±0.000015	0.657140±0.000910	0.003164±0.000012
1350	516.9±74.3	3.65	0.01	2432	4.949e-15	1	0.915524±0.000344	0.026458±0.000045	0.000974±0.000018	0.977485±0.001533	0.003260±0.000015
Packet IRR346-KZ, Experiment #16Z0047, 0.1521 g Basalt, all errors ±1 sigma
J = 0.000220785264127 ± 4.707301E-07
40Ar* is radiogenic argon, isotopes in volts (1.48e-13 moles/volt), corrected for blank, background, discrimination, and decay
Calculated bulk K/Ca = 7.879e-2 ± 3.364e-2, Calculated K2O = 0.76%wt., Calculated CaO = 11.81%wt., Calculated Cl = 3.7e-2ppm
Total Gas Age = 151.4 ± 8.9 ka
Weighted Mean Plateau Age = 134.4 ± 7.5 ka (±1 sigma, including ±J), 94.3% 39Ar released
Weighted Mean Plateau Age = 134.4 ± 7.5 ka (A priori, including ±J), 94.3% 39Ar released
Weighted Mean Plateau Age = 134.4 ± 12.0 ka (95% confidence, including ±J)
MSWD = 0.46 (Good fit, MSWD < 2.19)
Plateau K/Ca = 0.1655
Plateau K/Cl = -4626.0000
% radiogenic (plateau norm.) = 5.5540
Steps 9 of 10 (550,625,675,750,825,900,1000,1100,1200°C)
Isochron Age = 145.9 ± 12.2 ka (±1 sigma, including ±J)
Isochron Age = 145.9 ± 12.2 ka (A Priori Errors, including ±J)
Isochron Age = 145.9 ± 28.8 ka (95% confidence, including ±J)
MSWD = 0.32 (Good fit, MSWD < 2.29)
40Ar/36Ar intercept = 294.1 ± 1.2 (±1 sigma)
40Ar/36Ar intercept = 294.1 ± 1.2 (A Priori)
40Ar/36Ar intercept = 294.1 ± 2.8 (95% confidence)
Steps 9 of 10 (550,625,675,750,825,900,1000,1100,1200°C)
-----------------
R15TS169	Fluence monitor = Bodie Hills sanidine @ 9.635 ± 0.003 Ma, equivalent to Fish Canyon sanidine @ 27.642 ± 0.012 Ma with R(FCs/BHs) of 2.88340 ± 0.00089
Temp(°C)	Age(ka)	%40Ar*	K/Ca	K/Cl	moles 40Ar*	%39Ar	40Ar	39Ar	38Ar	37Ar	36Ar
550	660.8±35.8	39.33	1.04	-609	7.005e-15	0.03	0.120329±0.000667	0.028844±0.000181	0.000222±0.000021	0.014573±0.000167	0.000251±0.000008
625	680.3±26.1	30.18	0.64	-988	1.384e-14	0.09	0.309815±0.000979	0.055367±0.000280	0.000625±0.000046	0.045666±0.000212	0.000745±0.000012
700	555.5±20.7	24.02	0.53	-2773	1.269e-14	0.16	0.356903±0.000487	0.062177±0.000137	0.000894±0.000023	0.062022±0.000267	0.000935±0.000011
775	570.7±20.3	25.55	0.53	-6510	1.237e-14	0.22	0.327002±0.000230	0.058986±0.000083	0.000892±0.000032	0.058869±0.000205	0.000840±0.000010
850	581.1±19.6	26.19	0.56	-25609	1.449e-14	0.3	0.373872±0.000348	0.067887±0.000111	0.001057±0.000029	0.063857±0.000304	0.000952±0.000011
925	574.6±21.8	23.93	0.5	-1549	1.316e-14	0.37	0.371567±0.000590	0.062352±0.000147	0.000827±0.000034	0.065301±0.000270	0.000975±0.000011
1000	561.2±24.4	25.18	0.43	-1941	9.92e-15	0.42	0.266190±0.000277	0.048125±0.000101	0.000653±0.000023	0.058163±0.000193	0.000690±0.000010
1075	540.3±15.1	23.95	0.37	-8656	1.816e-14	0.52	0.512257±0.000261	0.091500±0.000096	0.001406±0.000017	0.128165±0.000452	0.001354±0.000012
1150	547.4±10.3	19.39	0.26	4487	3.796e-14	0.72	1.322833±0.000386	0.188924±0.000122	0.003346±0.000041	0.374047±0.000708	0.003713±0.000016
1200	578.8±12.6	15.05	0.1	6027	4.566e-14	0.96	2.049587±0.000706	0.215411±0.000156	0.004112±0.000047	1.177202±0.001016	0.006222±0.000021
1250	709.4±39.2	13.42	0.08	9137	9.993e-15	1	0.503210±0.000211	0.038486±0.000073	0.000805±0.000023	0.241505±0.000385	0.001542±0.000013
Packet IRR348-LZ, Experiment #16Z0082, 0.1531 g Basalt, all errors ±1 sigma
J = 0.000223185136909 ± 2.30357E-07
40Ar* is radiogenic argon, isotopes in volts (1.48e-13 moles/volt), corrected for blank, background, discrimination, and decay
Calculated bulk K/Ca = 0.204 ± 0.111, Calculated K2O = 1.53%wt., Calculated CaO = 9.16%wt., Calculated Cl = -0.3ppm
Total Gas Age = 585.9 ± 5.7 ka
Weighted Mean Plateau Age = 560.5 ± 5.8 ka (±1 sigma, including ±J), 86.7% 39Ar released
Weighted Mean Plateau Age = 560.5 ± 5.7 ka (A priori, including ±J), 86.7% 39Ar released
Weighted Mean Plateau Age = 560.5 ± 14.3 ka (95% confidence, including ±J)
MSWD = 1.05 (Good fit, MSWD < 2.29)
Plateau K/Ca = 0.3251
Plateau K/Cl = -1429.0000
% radiogenic (plateau norm.) = 20.8515
Steps 8 of 12 (700,775,850,925,1000,1075,1150,1200°C)
Isochron Age = 537.2 ± 22.3 ka (±1 sigma, including ±J)
Isochron Age = 537.2 ± 22.0 ka (A Priori Errors, including ±J)
Isochron Age = 537.2 ± 50.4 ka (95% confidence, including ±J)
MSWD = 1.02 (Good fit, MSWD < 2.40)
40Ar/36Ar intercept = 298.6 ± 2.9 (±1 sigma)
40Ar/36Ar intercept = 298.6 ± 2.9 (A Priori)
40Ar/36Ar intercept = 298.6 ± 6.6 (95% confidence)
Steps 8 of 12 (700,775,850,925,1000,1075,1150,1200°C)
-----------------
R16MS059	Fluence monitor = Bodie Hills sanidine @ 9.7970 ± 0.0031 Ma, equivalent to Fish Canyon sanidine @ 28.1053 ± 0.0124 Ma with R(FCs/BHs) of 2.88340 ± 0.00089
Temp(°C)	Age(ka)	%40Ar*	K/Ca	K/Cl	moles 40Ar*	%39Ar	40Ar	39Ar	38Ar	37Ar	36Ar
550	260.3±139.0	3.34	0.34	3633	4.949e-16	0.01	0.099980±0.000093	0.005489±0.000020	0.000139±0.000022	0.008502±0.000141	0.000326±0.000006
700	287.9±17.3	13.99	0.31	17858	6.115e-15	0.12	0.295465±0.000345	0.061324±0.000070	0.000982±0.000037	0.102900±0.000437	0.000880±0.000008
775	309.0±25.2	13	0.28	-867	5.78e-15	0.22	0.300532±0.000785	0.054004±0.000079	0.000609±0.000031	0.100449±0.000816	0.000904±0.000010
850	290.1±25.3	12.86	0.34	-1026	4.613e-15	0.3	0.242364±0.000465	0.045902±0.000051	0.000545±0.000027	0.070189±0.000521	0.000727±0.000009
950	330.6±22.5	13.58	0.29	-1536	6.242e-15	0.4	0.310741±0.000600	0.054521±0.000045	0.000735±0.000037	0.099577±0.000169	0.000927±0.000009
1050	294.0±19.4	11.41	0.23	-1980	6.719e-15	0.52	0.398069±0.000388	0.066014±0.000085	0.000949±0.000046	0.150251±0.000721	0.001223±0.000010
1125	313.2±20.1	9.24	0.2	3596	8.114e-15	0.66	0.593299±0.000248	0.074844±0.000071	0.001414±0.000046	0.192922±0.000675	0.001858±0.000012
1175	347.2±17.5	8.33	0.08	2462	1.402e-14	0.87	1.136981±0.000440	0.116970±0.000099	0.002410±0.000041	0.734135±0.002340	0.003697±0.000015
1225	377.7±28.1	6.05	0.05	8136	8.518e-15	0.99	0.952110±0.000294	0.065533±0.000099	0.001472±0.000047	0.696963±0.001000	0.003192±0.000014
1275	425.9±177.2	3.62	0.03	-6617	9.822e-16	1	0.183323±0.000149	0.006738±0.000038	0.000198±0.000017	0.122175±0.000584	0.000626±0.000009
Packet IRR356-SM, Experiment #16Z0315, 0.1543 g Basalt, all errors ±1 sigma
J = 0.000236608 ± 2.80E-07	2016-11-20
40Ar* is radiogenic argon, isotopes in volts (1.48e-13 moles/volt), corrected for blank, background, discrimination, and decay
Calculated bulk K/Ca = 0.127 ± 5.954e-2, Calculated K2O = 0.86%wt., Calculated CaO = 8.30%wt., Calculated Cl = -0.2ppm
Total Gas Age = 323.1 ± 7.9 ka
Weighted Mean Plateau Age = 315.9 ± 9.3 ka (±1 sigma, including ±J), 100.0% 39Ar released
Weighted Mean Plateau Age = 315.9 ± 7.4 ka (A priori, including ±J), 100.0% 39Ar released
Weighted Mean Plateau Age = 315.9 ± 21.4 ka (95% confidence, including ±J)
MSWD = 1.56 (Good fit, MSWD < 2.11)
Plateau K/Ca = 0.202
Plateau K/Cl = 3359
% radiogenic (plateau norm.) = 10.4
Steps 10 of 10 (550,700,775,850,950,1050,1125,1175,1225,1275°C)
Isochron Age = 261.3 ± 19.1 ka (±1 sigma, including ±J)
Isochron Age = 261.3 ± 19.1 ka (A Priori Errors, including ±J)
Isochron Age = 261.3 ± 45.2 ka (95% confidence, including ±J)
MSWD = 0.51 (Good fit, MSWD < 2.19)
40Ar/36Ar intercept = 304.4 ± 1.9 (±1 sigma)
40Ar/36Ar intercept = 304.4 ± 1.9 (A Priori)
40Ar/36Ar intercept = 304.4 ± 4.4 (95% confidence)
Steps 10 of 10 (550,700,775,850,950,1050,1125,1175,1225,1275°C)
-----------------
R15DD030	Fluence monitor = Bodie Hills sanidine @ 9.7970 ± 0.0031 Ma, equivalent to Fish Canyon sanidine @ 28.1053 ± 0.0124 Ma with R(FCs/BHs) of 2.88340 ± 0.00089
Temp(°C)	Age(ka)	%40Ar*	K/Ca	K/Cl	moles 40Ar*	%39Ar	40Ar	39Ar	38Ar	37Ar	36Ar
550	329.7±90.2	10.85	0.39	-3870	1.078e-15	0.01	0.067197±0.000353	0.009053±0.000027	0.000147±0.000024	0.012150±0.000116	0.000204±0.000007
625	225.2±39.7	9.36	0.48	10734	1.847e-15	0.05	0.133318±0.000484	0.022689±0.000048	0.000383±0.000019	0.024916±0.000430	0.000412±0.000007
700	233.7±15.0	11.31	0.54	6430	5.412e-15	0.14	0.323509±0.000344	0.064080±0.000071	0.001066±0.000052	0.062750±0.000317	0.000978±0.000008
775	247.3±13.7	13.46	0.5	4343	6.736e-15	0.25	0.338292±0.000269	0.075383±0.000075	0.001250±0.000048	0.078423±0.000576	0.001002±0.000008
825	212.0±18.2	12.6	0.44	6738	4.448e-15	0.33	0.238663±0.000171	0.058051±0.000073	0.000932±0.000032	0.068924±0.000579	0.000718±0.000009
900	178.2±20.2	8.11	0.38	2959	3.651e-15	0.42	0.304176±0.000167	0.056697±0.000068	0.001004±0.000028	0.078219±0.000371	0.000958±0.000009
1000	221.2±19.7	7.19	0.36	14495	5.031e-15	0.51	0.473065±0.000255	0.062954±0.000062	0.001123±0.000048	0.092381±0.000642	0.001496±0.000010
1075	203.9±30.0	3.88	0.34	270703	3.417e-15	0.58	0.595075±0.000240	0.046372±0.000072	0.000970±0.000021	0.072131±0.000354	0.001936±0.000011
1150	225.0±21.0	4.13	0.32	3017	6.142e-15	0.69	1.003961±0.000345	0.075563±0.000087	0.001706±0.000028	0.125021±0.000678	0.003259±0.000013
1200	259.9±34.1	2.99	0.14	2955	6.247e-15	0.78	1.412438±0.000478	0.066631±0.000065	0.001836±0.000048	0.244313±0.001469	0.004658±0.000018
1250	323.8±24.8	3.58	0.08	2600	1.363e-14	0.95	2.569008±0.000736	0.116898±0.000085	0.003297±0.000032	0.775402±0.001961	0.008514±0.000023
1300	389.2±53.2	4.14	0.06	7675	4.798e-15	1	0.782858±0.000346	0.034287±0.000066	0.000946±0.000029	0.291310±0.001197	0.002595±0.000015
Packet IRR355-RP, Experiment #16Z0312, 0.1559 g Basalt, all errors ±1 sigma
J = 0.000226842192961638 ± 3.3505E-07	2016-11-14
40Ar* is radiogenic argon, isotopes in volts (1.48e-13 moles/volt), corrected for blank, background, discrimination, and decay
Calculated bulk K/Ca = 0.183 ± 8.362e-2, Calculated K2O = 1.10%wt., Calculated CaO = 7.39%wt., Calculated Cl = 0.3ppm
Total Gas Age = 255.3 ± 7.9 ka
Weighted Mean Plateau Age = 225.0 ± 7.6 ka (±1 sigma, including ±J), 77.0% 39Ar released
Weighted Mean Plateau Age = 225.0 ± 6.6 ka (A priori, including ±J), 77.0% 39Ar released
Weighted Mean Plateau Age = 225.0 ± 17.9 ka (95% confidence, including ±J)
MSWD = 1.30 (Good fit, MSWD < 2.19)
Plateau K/Ca = 0.382
Plateau K/Cl = 3e+4
% radiogenic (plateau norm.) = 8.1
Steps 9 of 13 (625,700,775,825,900,1000,1075,1150,1200°C)
Isochron Age = 220.4 ± 15.1 ka (±1 sigma, including ±J)
Isochron Age = 220.4 ± 12.3 ka (A Priori Errors, including ±J)
Isochron Age = 220.4 ± 33.5 ka (95% confidence, including ±J)
MSWD = 1.49 (Good fit, MSWD < 2.29)
40Ar/36Ar intercept = 299.0 ± 1.4 (±1 sigma)
40Ar/36Ar intercept = 299.0 ± 1.2 (A Priori)
40Ar/36Ar intercept = 299.0 ± 3.2 (95% confidence)
Steps 9 of 13 (625,700,775,825,900,1000,1075,1150,1200°C)
-----------------
R14TRO140	Fluence monitor = Bodie Hills sanidine @ 9.7970 ± 0.0031 Ma, equivalent to Fish Canyon sanidine @ 28.1053 ± 0.0124 Ma with R(FCs/BHs) of 2.88340 ± 0.00089
Temp(°C)	Age(ka)	%40Ar*	K/Ca	K/Cl	moles 40Ar*	%39Ar	40Ar	39Ar	38Ar	37Ar	36Ar
550	245.5±30.1	18.2	0.44	-4870	2.383e-15	0.04	0.184035±0.000324	0.054344±0.000107	0.000762±0.000034	0.065342±0.000316	0.000522±0.000014
625	269.1±18.5	20.07	0.43	-7217	4.712e-15	0.12	0.330126±0.000390	0.098016±0.000134	0.001398±0.000045	0.120901±0.000936	0.000918±0.000015
700	223.6±17.0	12.8	0.38	-9064	5.165e-15	0.21	0.567171±0.000338	0.129353±0.000158	0.001952±0.000080	0.178839±0.001671	0.001706±0.000018
750	210.3±27.2	10.11	0.39	-8860	2.901e-15	0.27	0.403474±0.000415	0.077221±0.000128	0.001207±0.000034	0.104363±0.001173	0.001244±0.000018
800	195.8±38.6	8.18	0.36	-22149	2.006e-15	0.32	0.344894±0.000292	0.057366±0.000117	0.000943±0.000025	0.082917±0.000584	0.001084±0.000019
900	211.4±29.1	8.53	0.34	6794	3.62e-15	0.39	0.596523±0.000321	0.095886±0.000142	0.001666±0.000058	0.150011±0.000768	0.001869±0.000023
1000	224.9±22.2	8.52	0.26	-29229	4.231e-15	0.47	0.698156±0.000307	0.105383±0.000132	0.001774±0.000046	0.209881±0.000495	0.002198±0.000020
1100	218.4±17.0	7.62	0.27	18891	7.829e-15	0.62	1.444284±0.000515	0.200780±0.000213	0.003528±0.000106	0.383864±0.001693	0.004576±0.000029
1175	293.2±18.9	6.72	0.13	2625	1.308e-14	0.81	2.733084±0.001138	0.250118±0.000241	0.005314±0.000060	0.976761±0.001511	0.008812±0.000039
1225	319.5±24.5	5.53	0.07	2210	1.086e-14	0.95	2.757441±0.000797	0.191180±0.000178	0.004548±0.000078	1.526879±0.003604	0.009153±0.000038
1275	464.1±59.2	6.13	0.06	1518	3.439e-15	0.99	0.782946±0.000401	0.041402±0.000116	0.001129±0.000044	0.352944±0.001956	0.002561±0.000020
1375	505.7±110.8	6.17	0.06	2173	1.638e-15	1	0.372866±0.000387	0.018232±0.000087	0.000498±0.000029	0.170078±0.001260	0.001220±0.000017
Packet IRR362-XD, Experiment #17Z0152, 0.1487 g Basalt, all errors ±1 sigma
J = 0.000220624651 ± 3.1108E-07	2017-07-26
40Ar* is radiogenic argon, isotopes in volts (7.12e-14 moles/volt), corrected for blank, background, discrimination, and decay
Calculated bulk K/Ca = 0.160 ± 7.169e-2, Calculated K2O = 1.10%wt., Calculated CaO = 8.42%wt., Calculated Cl = 0.2ppm
Total Gas Age = 262.8 ± 7.5 ka
Weighted Mean Plateau Age = 218.1 ± 9.1 ka (±1 sigma, including ±J), 50.5% 39Ar released
Weighted Mean Plateau Age = 218.1 ± 9.1 ka (A priori, including ±J), 50.5% 39Ar released
Weighted Mean Plateau Age = 218.1 ± 25.2 ka (95% confidence, including ±J)
MSWD = 0.13 (Good fit, MSWD < 2.56)
Plateau K/Ca = 0.322
Plateau K/Cl = -2648
% radiogenic (plateau norm.) = 9.2
Steps 6 of 12 (700,750,800,900,1000,1100°C)
Isochron Age = 223.0 ± 43.9 ka (±1 sigma, including ±J)
Isochron Age = 223.0 ± 43.9 ka (A Priori Errors, including ±J)
Isochron Age = 223.0 ± 99.3 ka (95% confidence, including ±J)
MSWD = 0.16 (Good fit, MSWD < 2.77)
40Ar/36Ar intercept = 297.9 ± 6.0 (±1 sigma)
40Ar/36Ar intercept = 297.9 ± 6.0 (A Priori)
40Ar/36Ar intercept = 297.9 ± 13.6 (95% confidence)
Steps 6 of 12 (700,750,800,900,1000,1100°C)
-----------------
R15DD057	Fluence monitor = Bodie Hills sanidine @ 9.7970 ± 0.0031 Ma, equivalent to Fish Canyon sanidine @ 28.1053 ± 0.0124 Ma with R(FCs/BHs) of 2.88340 ± 0.00089
Temp(°C)	Age(ka)	%40Ar*	K/Ca	K/Cl	moles 40Ar*	%39Ar	40Ar	39Ar	38Ar	37Ar	36Ar
550	612.3±37.8	28.5	0.58	-1495	4.845e-15	0.03	0.239014±0.000805	0.044062±0.000098	0.000560±0.000063	0.039631±0.000420	0.000583±0.000014
625	573.4±20.6	26.81	0.61	-1166	1.06e-14	0.09	0.556076±0.001313	0.102991±0.000154	0.001231±0.000078	0.088340±0.000230	0.001388±0.000017
700	613.6±18.1	27.17	0.54	-8927	1.59e-14	0.19	0.822835±0.000743	0.144335±0.000177	0.002206±0.000056	0.139634±0.000567	0.002046±0.000022
775	560.5±15.1	25.77	0.53	-4145	1.362e-14	0.27	0.742921±0.000712	0.135325±0.000150	0.001987±0.000064	0.133385±0.000142	0.001884±0.000017
850	571.9±17.0	27.37	0.55	-4150	1.185e-14	0.34	0.608744±0.000468	0.115401±0.000137	0.001677±0.000098	0.110932±0.001078	0.001512±0.000016
925	599.9±22.6	28.23	0.44	-3621	1.167e-14	0.41	0.580845±0.000732	0.108315±0.000162	0.001559±0.000016	0.130375±0.000514	0.001433±0.000020
1025	612.4±18.9	27.85	0.34	-3262	1.474e-14	0.5	0.743880±0.000862	0.134064±0.000175	0.001926±0.000056	0.206333±0.001239	0.001855±0.000021
1125	585.5±16.5	22.43	0.29	4233	1.857e-14	0.61	1.163815±0.000486	0.176737±0.000169	0.003074±0.000042	0.324444±0.000729	0.003114±0.000025
1200	607.7±11.5	19.93	0.13	7151	3.484e-14	0.81	2.456969±0.000906	0.319947±0.000248	0.005658±0.000147	1.301084±0.004125	0.006954±0.000030
1250	626.9±19.3	14.13	0.09	22151	2.258e-14	0.94	2.247198±0.000701	0.201343±0.000166	0.003921±0.000076	1.195711±0.002739	0.006799±0.000032
1375	796.4±31.5	16.79	0.09	21198	1.303e-14	1	1.090889±0.000572	0.091464±0.000133	0.001801±0.000021	0.537236±0.003760	0.003191±0.000024
Packet IRR358-TX, Experiment #17Z0012, 0.1392 g Basalt, all errors ±1 sigma
J = 0.000219515896 ± 0.000000252077	2017-01-13
40Ar* is radiogenic argon, isotopes in volts (7.12e-14 moles/volt), corrected for blank, background, discrimination, and decay
Calculated bulk K/Ca = 0.196 ± 8.930e-2, Calculated K2O = 1.41%wt., Calculated CaO = 8.80%wt., Calculated Cl = -0.2ppm
Total Gas Age = 610.2 ± 5.6 ka
Weighted Mean Plateau Age = 594.7 ± 7.1 ka (±1 sigma, including ±J), 94.2% 39Ar released
Weighted Mean Plateau Age = 594.7 ± 5.6 ka (A priori, including ±J), 94.2% 39Ar released
Weighted Mean Plateau Age = 594.7 ± 16.4 ka (95% confidence, including ±J)
MSWD = 1.63 (Good fit, MSWD < 2.11)
Plateau K/Ca = 0.340
Plateau K/Cl = 2790
% radiogenic (plateau norm.) = 23.3
Steps 10 of 11 (550,625,700,775,850,925,1025,1125,1200,1250°C)
Isochron Age = 552.8 ± 19.6 ka (±1 sigma, including ±J)
Isochron Age = 552.8 ± 18.5 ka (A Priori Errors, including ±J)
Isochron Age = 552.8 ± 45.3 ka (95% confidence, including ±J)
MSWD = 1.13 (Good fit, MSWD < 2.19)
40Ar/36Ar intercept = 304.7 ± 2.8 (±1 sigma)
40Ar/36Ar intercept = 304.7 ± 2.6 (A Priori)
40Ar/36Ar intercept = 304.7 ± 6.4 (95% confidence)
Steps 10 of 11 (550,625,700,775,850,925,1025,1125,1200,1250°C)
-----------------
R15MS039	Fluence monitor = Bodie Hills sanidine @ 9.635 ± 0.003 Ma, equivalent to Fish Canyon sanidine @ 27.642 ± 0.012 Ma with R(FCs/BHs) of 2.88340 ± 0.00089
Temp(°C)	Age(ka)	%40Ar*	K/Ca	K/Cl	moles 40Ar*	%39Ar	40Ar	39Ar	38Ar	37Ar	36Ar
550	350.7±20.9	22.25	0.31	4319	6.745e-15	0.07	0.204807±0.000251	0.051389±0.000082	0.000829±0.000029	0.088101±0.000428	0.000563±0.000009
625	337.9±10.5	26.91	0.34	25744	1.562e-14	0.24	0.392123±0.000360	0.123485±0.000099	0.001829±0.000038	0.191186±0.000294	0.001023±0.000011
700	334.8±7.8	27.6	0.35	22623	2.127e-14	0.47	0.520793±0.000482	0.169742±0.000108	0.002507±0.000023	0.254382±0.000790	0.001347±0.000011
750	334.3±10.7	32.36	0.4	23461	1.393e-14	0.63	0.290955±0.000218	0.111324±0.000121	0.001611±0.000019	0.144282±0.000187	0.000706±0.000010
850	347.7±15.7	22.62	0.28	-26019	9.786e-15	0.73	0.292335±0.000193	0.075211±0.000087	0.001122±0.000027	0.141075±0.000271	0.000805±0.000010
925	359.5±21.4	17.48	0.19	-9258	6.743e-15	0.8	0.260723±0.000160	0.050152±0.000087	0.000775±0.000017	0.136563±0.000563	0.000766±0.000009
1025	317.9±29.8	9.41	0.15	-6285	5.172e-15	0.86	0.371466±0.000219	0.043520±0.000058	0.000759±0.000023	0.150330±0.000686	0.001181±0.000011
1125	344.2±33.9	8	0.12	-10097	5.889e-15	0.92	0.497515±0.000241	0.045806±0.000076	0.000877±0.000026	0.199226±0.000678	0.001605±0.000013
1225	323.5±72.5	2.04	0.02	451	3.287e-15	0.96	1.090291±0.000548	0.027759±0.000046	0.001320±0.000022	0.907074±0.002429	0.003869±0.000016
1375	516.5±73.0	2.92	0.02	1016	5.535e-15	1	1.278933±0.000452	0.029256±0.000063	0.001313±0.000031	0.929591±0.001277	0.004463±0.000017
1450	1070.1±363.4	3.6	0.02	343	1.076e-15	1	0.201908±0.000156	0.002732±0.000020	0.000194±0.000014	0.070551±0.000290	0.000678±0.000008
Packet IRR337-DU, Experiment #15Z0169_edited, 0.1501 g Basalt, all errors ±1 sigma
J = 0.000218952897711±0.000000242441412
40Ar* is radiogenic argon, isotopes in volts (1.48e-13 moles/volt), corrected for blank, background, discrimination, and decay
Calculated bulk K/Ca = 0.119 ± 5.1567e-2, Calculated K2O = 1.26%wt., Calculated CaO = 13.00%wt., Calculated Cl = 0.2ppm
Total Gas Age = 348.4 ± 6.3 ka
Weighted Mean Plateau Age = 339.0 ± 4.7 ka (±1 sigma, including ±J), 99.6% 39Ar released
Weighted Mean Plateau Age = 339.0 ± 4.7 ka (A priori, including ±J), 99.6% 39Ar released
Weighted Mean Plateau Age = 339.0 ± 10.4 ka (95% confidence, including ±J)
MSWD = 0.95 (Good fit, MSWD < 2.11)
Steps 10 of 11 (550,625,700,750,850,925,1025,1125,1225,1375°C)
Isochron Age = 332.9 ± 6.0 ka (±1 sigma, including ±J)
Isochron Age = 332.9 ± 6.0 ka (A Priori Errors, including ±J)
Isochron Age = 332.9 ± 13.9 ka (95% confidence, including ±J)
MSWD = 0.72 (Good fit, MSWD < 2.19)
40Ar/36Ar intercept = 297.0 ± 0.9 (±1 sigma)
40Ar/36Ar intercept = 297.0 ± 0.9 (A Priori)
40Ar/36Ar intercept = 297.0 ± 2.1 (95% confidence)
Steps 10 of 11 (550,625,700,750,850,925,1025,1125,1225,1375°C)
-----------------
R15DD051	Fluence monitor = Bodie Hills sanidine @ 9.7970 ± 0.0031 Ma, equivalent to Fish Canyon sanidine @ 28.1053 ± 0.0124 Ma with R(FCs/BHs) of 2.88340 ± 0.00089
Temp(°C)	Age(ka)	%40Ar*	K/Ca	K/Cl	moles 40Ar*	%39Ar	40Ar	39Ar	38Ar	37Ar	36Ar
625	753.3±28.6	38.57	0.32	-2067	1.227e-14	0.07	0.214907±0.000267	0.045120±0.000073	0.000584±0.000021	0.074471±0.000214	0.000463±0.000010
700	765.4±16.9	35.32	0.32	-680	3.05e-14	0.23	0.583472±0.001114	0.110401±0.000137	0.000995±0.000139	0.179060±0.000611	0.001314±0.000015
750	668.1±17.5	50.71	0.41	-1902	2.246e-14	0.36	0.299351±0.000645	0.093133±0.000116	0.001109±0.000063	0.120131±0.000470	0.000528±0.000013
800	671.3±14.0	51.61	0.5	-4916	2.339e-14	0.51	0.306372±0.000443	0.096529±0.000152	0.001279±0.000022	0.101953±0.000230	0.000525±0.000011
850	690.7±21.6	51.35	0.42	6184	1.497e-14	0.59	0.197029±0.000287	0.060036±0.000078	0.000892±0.000053	0.074948±0.000288	0.000342±0.000011
925	729.5±32.6	30.04	0.29	-2254	1.168e-14	0.66	0.262767±0.000319	0.044381±0.000070	0.000616±0.000029	0.079652±0.000512	0.000638±0.000012
1000	684.1±46.4	20.59	0.24	-1259	7.973e-15	0.71	0.261656±0.000409	0.032310±0.000061	0.000446±0.000053	0.069470±0.000391	0.000715±0.000012
1050	743.6±64.3	20.42	0.22	-2034	4.69e-15	0.73	0.155182±0.000173	0.017487±0.000043	0.000271±0.000016	0.040863±0.000247	0.000425±0.000009
1100	718.2±47.4	18.86	0.22	2359	6.413e-15	0.77	0.229782±0.000214	0.024757±0.000049	0.000488±0.000014	0.058879±0.000158	0.000641±0.000010
1150	773.1±50.2	13.99	0.14	1066	7.366e-15	0.81	0.355692±0.000248	0.026446±0.000053	0.000648±0.000017	0.101557±0.000272	0.001053±0.000011
1200	852.2±38.9	10.06	0.04	7031	1.464e-14	0.88	0.983783±0.000362	0.047944±0.000075	0.001226±0.000035	0.557311±0.000991	0.003120±0.000015
1250	1395.3±32.6	14.72	0.04	-11339	2.91e-14	0.96	1.335418±0.000388	0.058279±0.000078	0.001476±0.000015	0.796353±0.002109	0.004038±0.000014
1350	1490.1±51.4	16.83	0.06	7590	1.387e-14	1	0.556816±0.000226	0.025937±0.000046	0.000651±0.000017	0.244252±0.000922	0.001620±0.000011
Packet IRR354-QI, Experiment #16Z0249, 0.1516 g Basalt, all errors ±1 sigma
J = 0.000227110489027 ± 3.88451E-07	2016-08-26
40Ar* is radiogenic argon, isotopes in volts (1.48e-13 moles/volt), corrected for blank, background, discrimination, and decay
Calculated bulk K/Ca = 0.143 ± 6.026e-2, Calculated K2O = 1.13%wt., Calculated CaO = 9.65%wt., Calculated Cl = -0.5ppm
Total Gas Age = 810.1 ± 7.8 ka
Weighted Mean Plateau Age = 684.449 ± 9.583 ka (±1 sigma, including ±J), 57.948% 39Ar released
Weighted Mean Plateau Age = 684.449 ± 8.851 ka (A priori, including ±J), 57.948% 39Ar released
Weighted Mean Plateau Age = 684.449 ± 23.449 ka (95% confidence, including ±J)
MSWD = 1.17 (Good fit, MSWD < 2.29)
Plateau K/Ca = 0.3665
Plateau K/Cl = -937.0000
% radiogenic (plateau norm.) = 40.4560
Steps 8 of 13 (750,800,850,925,1000,1050,1100,1150°C)
Isochron Age = 660.417 ± 13.422 ka (±1 sigma, including ±J)
Isochron Age = 660.417 ± 13.422 ka (A Priori Errors, including ±J)
Isochron Age = 660.417 ± 29.820 ka (95% confidence, including ±J)
MSWD = 0.37 (Good fit, MSWD < 2.40)
40Ar/36Ar intercept = 305.3 ± 2.9 (±1 sigma)
40Ar/36Ar intercept = 305.3 ± 2.9 (A Priori)
40Ar/36Ar intercept = 305.3 ± 6.4 (95% confidence)
Steps 8 of 13 (750,800,850,925,1000,1050,1100,1150°C)
-----------------
R15MS040b	Fluence monitor = Bodie Hills sanidine @ 9.7970 ± 0.0031 Ma, equivalent to Fish Canyon sanidine @ 28.1053 ± 0.0124 Ma with R(FCs/BHs) of 2.88340 ± 0.00089
Temp(°C)	Age(ka)	%40Ar*	K/Ca	K/Cl	moles 40Ar*	%39Ar	40Ar	39Ar	38Ar	37Ar	36Ar
550	168.5±58.0	3.46	0.24	2467	1.247e-15	0.04	0.243344±0.000148	0.020079±0.000045	0.000447±0.000050	0.042949±0.000302	0.000799±0.000010
625	202.8±22.4	5.99	0.27	15799	3.639e-15	0.12	0.410645±0.000217	0.048685±0.000076	0.000897±0.000034	0.094953±0.000088	0.001320±0.000009
700	160.5±22.9	3.72	0.25	-59409	3.517e-15	0.22	0.638411±0.000251	0.059456±0.000064	0.001165±0.000037	0.124815±0.000582	0.002094±0.000011
775	239.7±34.9	5.35	0.28	-8271	3.079e-15	0.29	0.389004±0.000170	0.034851±0.000056	0.000672±0.000016	0.066047±0.000402	0.001252±0.000010
850	117.3±34.1	2.98	0.26	-5902	1.597e-15	0.35	0.362176±0.000167	0.036916±0.000061	0.000680±0.000025	0.074827±0.000540	0.001198±0.000010
950	109.9±30.5	2.64	0.2	-8938	1.763e-15	0.43	0.450802±0.000200	0.043504±0.000064	0.000828±0.000041	0.116723±0.000220	0.001503±0.000011
1050	143.1±21.9	2.57	0.21	4779	5.101e-15	0.59	1.339452±0.000432	0.096744±0.000105	0.002181±0.000030	0.237865±0.000516	0.004437±0.000018
1100	138.1±28.9	1.8	0.23	-38892	3.71e-15	0.72	1.395138±0.000438	0.072902±0.000080	0.001812±0.000033	0.162650±0.000859	0.004634±0.000017
1150	175.6±30.5	2.29	0.17	3034	4.934e-15	0.86	1.457826±0.000402	0.076262±0.000080	0.002007±0.000064	0.232992±0.000554	0.004836±0.000019
1200	186.3±41.6	1.71	0.04	1681	4.196e-15	0.96	1.657952±0.000569	0.061613±0.000090	0.002006±0.000049	0.851906±0.001383	0.005697±0.000020
1250	165.4±106.6	0.79	0.01	1000	1.325e-15	1	1.133243±0.000409	0.022287±0.000059	0.001110±0.000018	0.845498±0.001311	0.004003±0.000019
Packet IRR354-QE, Experiment #16Z0254, 0.1567 g Basalt, all errors ±1 sigma
J = 0.000222217010827 ± 3.52035E-07	2016-08-31
40Ar* is radiogenic argon, isotopes in volts (1.48e-13 moles/volt), corrected for blank, background, discrimination, and decay
Calculated bulk K/Ca = 0.105 ± 4.731e-2, Calculated K2O = 0.93%wt., Calculated CaO = 10.89%wt., Calculated Cl = 0.2ppm
Total Gas Age = 161.7 ± 10.2 ka
Weighted Mean Plateau Age = 162.865 ± 11.148 ka (±1 sigma, including ±J), 100.000% 39Ar released
Weighted Mean Plateau Age = 162.865 ± 9.147 ka (A priori, including ±J), 100.000% 39Ar released
Weighted Mean Plateau Age = 162.865 ± 25.217 ka (95% confidence, including ±J)
MSWD = 1.49 (Good fit, MSWD < 2.05)
Plateau K/Ca = 0.1990
Plateau K/Cl = -9832.0000
% radiogenic (plateau norm.) = 2.9183
Steps 11 of 11 (550,625,700,775,850,950,1050,1100,1150,1200,1250°C)
Isochron Age = 165.135 ± 28.926 ka (±1 sigma, including ±J)
Isochron Age = 165.135 ± 22.630 ka (A Priori Errors, including ±J)
Isochron Age = 165.135 ± 66.700 ka (95% confidence, including ±J)
MSWD = 1.63 (Good fit, MSWD < 2.11)
40Ar/36Ar intercept = 298.4 ± 1.5 (±1 sigma)
40Ar/36Ar intercept = 298.4 ± 1.2 (A Priori)
40Ar/36Ar intercept = 298.4 ± 3.4 (95% confidence)
Steps 11 of 11 (550,625,700,775,850,950,1050,1100,1150,1200,1250°C)
-----------------
R15DD020	Fluence monitor = Bodie Hills sanidine @ 9.7970 ± 0.0031 Ma, equivalent to Fish Canyon sanidine @ 28.1053 ± 0.0124 Ma with R(FCs/BHs) of 2.88340 ± 0.00089
Temp(°C)	Age(ka)	%40Ar*	K/Ca	K/Cl	moles 40Ar*	%39Ar	40Ar	39Ar	38Ar	37Ar	36Ar
550	425.2±65.4	7.62	0.36	-449	2.676e-15	0.04	0.493766±0.000850	0.035408±0.000093	0.000414±0.000031	0.051729±0.000794	0.001542±0.000019
625	373.0±31.2	7.78	0.29	-10485	5.164e-15	0.12	0.932524±0.000494	0.077911±0.000119	0.001534±0.000042	0.139850±0.001267	0.002919±0.000020
700	399.7±25.2	8.71	0.22	16946	8.135e-15	0.25	1.313130±0.000449	0.114584±0.000159	0.002292±0.000043	0.269150±0.001059	0.004091±0.000024
775	408.4±27.8	8.36	0.27	4327	6.6e-15	0.35	1.109253±0.000572	0.090952±0.000136	0.001926±0.000028	0.175723±0.002176	0.003454±0.000021
875	391.4±31.2	7.25	0.34	2980	5.956e-15	0.44	1.155245±0.000487	0.085628±0.000113	0.001922±0.000069	0.133880±0.001090	0.003626±0.000022
975	332.6±42.0	3.91	0.32	43139	4.625e-15	0.53	1.660963±0.000576	0.078254±0.000114	0.002038±0.000038	0.127993±0.000513	0.005381±0.000027
1075	328.9±47.3	2.46	0.28	3339	6.401e-15	0.65	3.656360±0.001239	0.109515±0.000181	0.003818±0.000087	0.208388±0.000700	0.012004±0.000043
1200	464.9±24.3	4.93	0.16	2630	2.114e-14	0.93	6.023505±0.002057	0.256140±0.000268	0.007388±0.000053	0.848801±0.001077	0.019418±0.000051
1250	595.1±71.6	5.14	0.07	2169	4.349e-15	0.97	1.189757±0.000607	0.041294±0.000116	0.001338±0.000051	0.305578±0.003343	0.003866±0.000024
1375	691.8±109.0	4.75	0.04	1113	3.158e-15	1	0.934002±0.000496	0.025884±0.000076	0.001004±0.000062	0.323189±0.001231	0.003070±0.000023
Packet IRR357-TH, Experiment #17Z0002, 0.125 g Basalt, all errors ±1 sigma
J = 0.000221675598 ± 0.000000279696	2017-01-03
40Ar* is radiogenic argon, isotopes in volts (7.12e-14 moles/volt), corrected for blank, background, discrimination, and decay
Calculated bulk K/Ca = 0.186 ± 7.649e-2, Calculated K2O = 0.90%wt., Calculated CaO = 5.96%wt., Calculated Cl = 0.2ppm
Total Gas Age = 419.5 ± 12.0 ka
Weighted Mean Plateau Age = 402.5 ± 15.4 ka (±1 sigma, including ±J), 92.7% 39Ar released
Weighted Mean Plateau Age = 402.5 ± 11.3 ka (A priori, including ±J), 92.7% 39Ar released
Weighted Mean Plateau Age = 402.5 ± 37.6 ka (95% confidence, including ±J)
MSWD = 1.86 (Good fit, MSWD < 2.29)
Plateau K/Ca = 0.248
Plateau K/Cl = 7277
% radiogenic (plateau norm.) = 6.0
Steps 8 of 10 (550,625,700,775,875,975,1075,1200°C)
Isochron Age = 396.0 ± 43.6 ka (±1 sigma, including ±J)
Isochron Age = 396.0 ± 29.7 ka (A Priori Errors, including ±J)
Isochron Age = 396.0 ± 103.1 ka (95% confidence, including ±J)
MSWD = 2.16 (Good fit, MSWD < 2.40)
40Ar/36Ar intercept = 298.8 ± 1.9 (±1 sigma)
40Ar/36Ar intercept = 298.8 ± 1.3 (A Priori)
40Ar/36Ar intercept = 298.8 ± 4.6 (95% confidence)
Steps 8 of 10 (550,625,700,775,875,975,1075,1200°C)
-----------------
R15TS155	Fluence monitor = Bodie Hills sanidine @ 9.635 ± 0.003 Ma, equivalent to Fish Canyon sanidine @ 27.642 ± 0.012 Ma with R(FCs/BHs) of 2.88340 ± 0.00089
Temp(°C)	Age(ka)	%40Ar*	K/Ca	K/Cl	moles 40Ar*	%39Ar	40Ar	39Ar	38Ar	37Ar	36Ar
550	158.9±18.2	7.36	0.45	19744	3.541e-15	0.08	0.325162±0.000176	0.060387±0.000069	0.000999±0.000020	0.070599±0.000228	0.001039±0.000009
625	147.0±13.6	8.66	0.45	-43364	5.295e-15	0.21	0.413081±0.000219	0.097593±0.000078	0.001514±0.000020	0.114013±0.000332	0.001309±0.000011
700	115.3±18.9	5.29	0.41	6005	3.8e-15	0.32	0.485301±0.000350	0.089293±0.000156	0.001530±0.000029	0.113126±0.000417	0.001587±0.000014
775	108.1±22.2	3.47	0.42	264386	2.447e-15	0.41	0.476061±0.000235	0.061351±0.000080	0.001100±0.000035	0.076772±0.000261	0.001576±0.000011
850	159.4±26.1	4.28	0.33	-7639	2.92e-15	0.47	0.461191±0.000212	0.049646±0.000069	0.000906±0.000024	0.077875±0.000183	0.001516±0.000011
950	88.9±28.5	2.18	0.25	-304999	1.78e-15	0.54	0.552831±0.000208	0.054303±0.000068	0.001058±0.000026	0.114476±0.000374	0.001862±0.000013
1050	86.0±22.8	1.91	0.26	70594	2.681e-15	0.65	0.949024±0.000300	0.084545±0.000102	0.001709±0.000020	0.170220±0.000402	0.003198±0.000016
1150	118.6±20.2	1.87	0.21	2925	5.488e-15	0.82	1.979501±0.000678	0.125457±0.000095	0.003068±0.000034	0.313873±0.000512	0.006661±0.000021
1200	130.7±27.5	1.54	0.07	3110	4.877e-15	0.95	2.135469±0.000533	0.101532±0.000087	0.002821±0.000024	0.728547±0.000992	0.007320±0.000023
1250	143.9±74.3	0.56	0.04	1759	1.76e-15	0.99	2.135311±0.000627	0.033394±0.000054	0.001873±0.000046	0.410804±0.000777	0.007301±0.000021
1350	324.0±230.6	1.31	0.05	813	6.365e-16	1	0.327171±0.000195	0.005359±0.000024	0.000304±0.000019	0.057026±0.000235	0.001109±0.000010
Packet IRR348-LX, Experiment #16Z0086, 0.1526 g Basalt, all errors ±1 sigma
J = 0.000222110001280 ± 2.76296E-07
40Ar* is radiogenic argon, isotopes in volts (1.48e-13 moles/volt), corrected for blank, background, discrimination, and decay
Calculated bulk K/Ca = 0.178 ± 7.476e-2, Calculated K2O = 1.28%wt., Calculated CaO = 8.82%wt., Calculated Cl = 0.2ppm
Total Gas Age = 125.3 ± 7.9 ka
Weighted Mean Plateau Age = 129.0 ± 8.2 ka (±1 sigma, including ±J), 99.3% 39Ar released
Weighted Mean Plateau Age = 129.0 ± 6.8 ka (A priori, including ±J), 99.3% 39Ar released
Weighted Mean Plateau Age = 129.0 ± 18.8 ka (95% confidence, including ±J)
MSWD = 1.45 (Good fit, MSWD < 2.11)
Plateau K/Ca = 0.2915
Plateau K/Cl = 4612.0000
% radiogenic (plateau norm.) = 3.8011
Steps 10 of 11 (550,625,700,775,850,950,1050,1150,1200,1250°C)
Isochron Age = 134.9 ± 13.4 ka (±1 sigma, including ±J)
Isochron Age = 134.9 ± 10.8 ka (A Priori Errors, including ±J)
Isochron Age = 134.9 ± 30.9 ka (95% confidence, including ±J)
MSWD = 1.56 (Good fit, MSWD < 2.19)
40Ar/36Ar intercept = 294.9 ± 0.9 (±1 sigma)
40Ar/36Ar intercept = 294.9 ± 0.7 (A Priori)
40Ar/36Ar intercept = 294.9 ± 2.0 (95% confidence)
Steps 10 of 11 (550,625,700,775,850,950,1050,1150,1200,1250°C)
-----------------
R14TS101	Fluence monitor = Bodie Hills sanidine @ 9.635 ± 0.003 Ma, equivalent to Fish Canyon sanidine @ 27.642 ± 0.012 Ma with R(FCs/BHs) of 2.88340 ± 0.00089
Temp(°C)	Age(ka)	%40Ar*	K/Ca	K/Cl	moles 40Ar*	%39Ar	40Ar	39Ar	38Ar	37Ar	36Ar
550	548.5±1931.2	-4.63	0.08	-25	9.512e-17	0	-0.013876±0.000108	0.000482±0.000024	-0.000085±0.000022	0.003114±0.000049	-0.000048±0.000008
625	382.8±46.5	11.1	0.21	2791	6.883e-15	0.07	0.418772±0.000677	0.049810±0.000096	0.000969±0.000033	0.121579±0.000733	0.001294±0.000019
700	392.6±22.9	15.57	0.23	1123	1.529e-14	0.22	0.663381±0.000525	0.107861±0.000163	0.002189±0.000073	0.242251±0.000623	0.001963±0.000020
775	389.0±23.3	15.83	0.24	1042	1.294e-14	0.35	0.552106±0.000454	0.092109±0.000143	0.001888±0.000054	0.197219±0.000212	0.001628±0.000018
850	344.5±13.0	12.97	0.25	1268	1.058e-14	0.47	0.551507±0.000254	0.085092±0.000124	0.001714±0.000071	0.181405±0.000272	0.001675±0.000009
925	377.9±22.9	14.4	0.19	1976	8.964e-15	0.56	0.420743±0.000363	0.065736±0.000086	0.001238±0.000055	0.185805±0.000458	0.001271±0.000012
1025	414.5±39.7	11.32	0.14	2262	8.532e-15	0.64	0.509393±0.000622	0.057075±0.000114	0.001149±0.000062	0.208989±0.000174	0.001587±0.000018
1125	361.1±23.5	7.26	0.14	1283	1.062e-14	0.76	0.988081±0.000331	0.081561±0.000116	0.001931±0.000055	0.312432±0.000594	0.003188±0.000016
1225	445.8±34.6	3.66	0.04	865	1.402e-14	0.88	2.588611±0.000672	0.087840±0.000146	0.003192±0.000063	1.221985±0.002467	0.008783±0.000024
1350	399.0±41.9	2.2	0.02	1183	1.141e-14	0.99	3.500792±0.001174	0.080341±0.000146	0.003551±0.000052	1.792307±0.003313	0.012090±0.000025
1450	480.0±147.4	7.04	0.03	274	1.407e-15	1	0.135145±0.000288	0.008227±0.000071	0.000319±0.000023	0.168232±0.000781	0.000472±0.000010
Packet IRR332-ZI, Experiment #15Z0013, 0.2018 g Basalt, all errors ±1 sigma
J = 0.0002269095144±2.6694E-07
40Ar* is radiogenic argon, isotopes in volts (1.48e-13 moles/volt), corrected for blank, background, discrimination, and decay
Calculated bulk K/Ca = 8.069e-2 ± 3.9342e-2, Calculated K2O = 0.89%wt., Calculated CaO = 13.46%wt., Calculated Cl = 0.8ppm
Total Gas Age = 390.8 ± 9.9 ka
Weighted Mean Plateau Age = 372.5 ± 9.8 ka (±1 sigma, including ±J), 98.8% 39Ar released
Weighted Mean Plateau Age = 372.5 ± 7.9 ka (A priori, including ±J), 98.8% 39Ar released
Weighted Mean Plateau Age = 372.5 ± 22.2 ka (95% confidence, including ±J)
MSWD = 1.53 (Good fit, MSWD < 2.19)
Steps 9 of 11 (625,700,775,850,925,1025,1125,1225,1350°C)
Isochron Age = 357.1 ± 13.1 ka (±1 sigma, including ±J)
Isochron Age = 357.1 ± 11.5 ka (A Priori Errors, including ±J)
Isochron Age = 357.1 ± 30.1 ka (95% confidence, including ±J)
MSWD = 1.29 (Good fit, MSWD < 2.29)
40Ar/36Ar intercept = 296.7 ± 0.8 (±1 sigma)
40Ar/36Ar intercept = 296.7 ± 0.7 (A Priori)
40Ar/36Ar intercept = 296.7 ± 1.8 (95% confidence)
Steps 9 of 11 (625,700,775,850,925,1025,1125,1225,1350°C)
-----------------
R15MS022	Fluence monitor = Bodie Hills sanidine @ 9.635 ± 0.003 Ma, equivalent to Fish Canyon sanidine @ 27.642 ± 0.012 Ma with R(FCs/BHs) of 2.88340 ± 0.00089
Temp(°C)	Age(ka)	%40Ar*	K/Ca	K/Cl	moles 40Ar*	%39Ar	40Ar	39Ar	38Ar	37Ar	36Ar
550	201.0±20.7	5.84	0.48	-2433	5.688e-15	0.09	0.658397±0.000303	0.076523±0.000112	0.001265±0.000025	0.083482±0.000521	0.002121±0.000013
625	204.9±18.2	5.62	0.47	-2072	6.499e-15	0.18	0.781869±0.000319	0.085774±0.000118	0.001419±0.000024	0.094766±0.000505	0.002524±0.000013
700	192.3±27.5	3.36	0.43	-2359	4.054e-15	0.25	0.815258±0.000290	0.057012±0.000085	0.001146±0.000025	0.069427±0.000331	0.002686±0.000013
775	229.0±39.9	3.26	0.43	-6438	3.645e-15	0.29	0.755421±0.000303	0.043037±0.000067	0.001000±0.000026	0.052473±0.000455	0.002488±0.000014
850	263.0±39.8	4.02	0.4	-2264	4.102e-15	0.34	0.688988±0.000244	0.042177±0.000069	0.000894±0.000032	0.055780±0.000548	0.002253±0.000014
950	372.6±69.9	6.96	0.35	-708	8.239e-15	0.41	0.799272±0.000725	0.059798±0.000303	0.000896±0.000068	0.088973±0.001399	0.002541±0.000035
1050	208.5±20.2	4.96	0.29	-1940	6.881e-15	0.51	0.937276±0.000465	0.089292±0.000127	0.001543±0.000029	0.163651±0.000550	0.003060±0.000015
1100	202.2±18.8	4.6	0.33	-59226	7.39e-15	0.62	1.085139±0.000307	0.098855±0.000096	0.001950±0.000042	0.159158±0.000724	0.003548±0.000016
1150	191.8±17.7	4.22	0.16	3733	9.054e-15	0.76	1.450224±0.000412	0.127870±0.000098	0.002715±0.000019	0.414104±0.000948	0.004817±0.000019
1200	228.0±13.7	4.62	0.08	3659	1.699e-14	0.99	2.486027±0.000703	0.202409±0.000129	0.004429±0.000027	1.394236±0.002830	0.008415±0.000022
1250	180.6±107.4	2.3	0.07	2565	7.582e-16	1	0.222950±0.000212	0.011406±0.000037	0.000309±0.000024	0.088556±0.000725	0.000762±0.000010
Packet IRR346-LL, Experiment #16Z0083, 0.1534 g Basalt, all errors ±1 sigma
J = 0.000221671644432 ± 2.586300E-07
40Ar* is radiogenic argon, isotopes in volts (1.48e-13 moles/volt), corrected for blank, background, discrimination, and decay
Calculated bulk K/Ca = 0.176 ± 9.825e-2, Calculated K2O = 1.50%wt., Calculated CaO = 10.42%wt., Calculated Cl = -0.3ppm
Total Gas Age = 222.0 ± 7.8 ka
Weighted Mean Plateau Age = 211.3 ± 7.1 ka (±1 sigma, including ±J), 100.0% 39Ar released
Weighted Mean Plateau Age = 211.3 ± 6.7 ka (A priori, including ±J), 100.0% 39Ar released
Weighted Mean Plateau Age = 211.3 ± 16.1 ka (95% confidence, including ±J)
MSWD = 1.11 (Good fit, MSWD < 2.05)
Plateau K/Ca = 0.2830
Plateau K/Cl = -6378.0000
% radiogenic (plateau norm.) = 4.7475
Steps 11 of 11 (550,625,700,775,850,950,1050,1100,1150,1200,1250°C)
Isochron Age = 165.9 ± 36.3 ka (±1 sigma, including ±J)
Isochron Age = 165.9 ± 36.1 ka (A Priori Errors, including ±J)
Isochron Age = 165.9 ± 83.7 ka (95% confidence, including ±J)
MSWD = 1.01 (Good fit, MSWD < 2.11)
40Ar/36Ar intercept = 298.6 ± 2.4 (±1 sigma)
40Ar/36Ar intercept = 298.6 ± 2.4 (A Priori)
40Ar/36Ar intercept = 298.6 ± 5.6 (95% confidence)
Steps 11 of 11 (550,625,700,775,850,950,1050,1100,1150,1200,1250°C)
-----------------
R16MS055	Fluence monitor = Bodie Hills sanidine @ 9.7970 ± 0.0031 Ma, equivalent to Fish Canyon sanidine @ 28.1053 ± 0.0124 Ma with R(FCs/BHs) of 2.88340 ± 0.00089
Temp(°C)	Age(ka)	%40Ar*	K/Ca	K/Cl	moles 40Ar*	%39Ar	40Ar	39Ar	38Ar	37Ar	36Ar
550	375.5±73.1	15.62	0.28	-433	2.276e-15	0.03	0.204922±0.003273	0.033727±0.000108	0.000219±0.000073	0.062604±0.000843	0.000597±0.000018
625	298.6±37.8	14.18	0.28	-616	4.53e-15	0.11	0.449059±0.004922	0.084398±0.000170	0.000767±0.000057	0.158513±0.001252	0.001335±0.000021
700	285.8±23.0	10.98	0.23	-1777	6.779e-15	0.23	0.867932±0.002387	0.132011±0.000159	0.001907±0.000099	0.302402±0.000973	0.002672±0.000024
775	242.8±22.5	10.41	0.22	-2180	4.439e-15	0.33	0.595221±0.000890	0.101031±0.000161	0.001469±0.000038	0.241761±0.001166	0.001854±0.000019
850	268.9±25.5	10.51	0.22	-3846	4.202e-15	0.41	0.561953±0.000481	0.086965±0.000129	0.001365±0.000081	0.202623±0.000450	0.001741±0.000019
950	236.2±29.3	6.91	0.19	-3780	3.578e-15	0.49	0.727903±0.000842	0.084301±0.000131	0.001442±0.000030	0.229094±0.001627	0.002334±0.000021
1050	308.5±28.7	7.98	0.15	-4397	4.082e-15	0.56	0.718611±0.000706	0.073682±0.000090	0.001316±0.000038	0.249382±0.000561	0.002285±0.000018
1125	255.0±28.5	6.16	0.16	-11739	4.414e-15	0.65	1.006756±0.000442	0.096395±0.000116	0.001830±0.000030	0.313955±0.000916	0.003252±0.000023
1200	302.2±16.8	6.01	0.07	4884	1.26e-14	0.87	2.946917±0.000801	0.232833±0.000261	0.005040±0.000065	1.800406±0.003019	0.009783±0.000031
1275	403.6±33.8	4.7	0.04	465449	9.392e-15	0.99	2.806344±0.000882	0.130563±0.000152	0.003434±0.000095	1.804824±0.001582	0.009464±0.000035
1400	1218.0±169.2	6.92	0.03	-4177	2.872e-15	1	0.583620±0.000337	0.013246±0.000060	0.000506±0.000026	0.210950±0.000887	0.001879±0.000019
Packet IRR358-TN, Experiment #17Z0009, 0.1482 g Basalt , all errors ±1 sigma
J = 0.000219120948 ± 0.000000294134	2017-01-10
40Ar* is radiogenic argon, isotopes in volts (7.12e-14 moles/volt), corrected for blank, background, discrimination, and decay
Calculated bulk K/Ca = 0.100 ± 4.772e-2, Calculated K2O = 0.90%wt., Calculated CaO = 10.98%wt., Calculated Cl = -0.3ppm
Total Gas Age = 308.4 ± 8.7 ka
Weighted Mean Plateau Age = 286.3 ± 13.5 ka (±1 sigma, including ±J), 98.8% 39Ar released
Weighted Mean Plateau Age = 286.3 ± 8.4 ka (A priori, including ±J), 98.8% 39Ar released
Weighted Mean Plateau Age = 286.3 ± 31.2 ka (95% confidence, including ±J)
MSWD = 2.61 (Poor fit, MSWD > 2.11)
Plateau K/Ca = 0.160
Plateau K/Cl = 6e+4
% radiogenic (plateau norm.) = 8.5
Steps 10 of 11 (550,625,700,775,850,950,1050,1125,1200,1275°C)
Isochron Age = 218.7 ± 23.7 ka (±1 sigma, including ±J)
Isochron Age = 218.7 ± 20.7 ka (A Priori Errors, including ±J)
Isochron Age = 218.7 ± 54.7 ka (95% confidence, including ±J)
MSWD = 1.31 (Good fit, MSWD < 2.19)
40Ar/36Ar intercept = 304.2 ± 1.8 (±1 sigma)
40Ar/36Ar intercept = 304.2 ± 1.6 (A Priori)
40Ar/36Ar intercept = 304.2 ± 4.2 (95% confidence)
Steps 10 of 11 (550,625,700,775,850,950,1050,1125,1200,1275°C)
-----------------
R14TS45	Fluence monitor = Bodie Hills sanidine @ 9.635 ± 0.003 Ma, equivalent to Fish Canyon sanidine @ 27.642 ± 0.012 Ma with R(FCs/BHs) of 2.88340 ± 0.00089
Temp(°C)	Age(ka)	%40Ar*	K/Ca	K/Cl	moles 40Ar*	%39Ar	40Ar	39Ar	38Ar	37Ar	36Ar
550	610.3±71.2	12.45	0.24	-1119	3.102e-15	0.02	0.168283±0.000368	0.013980±0.000047	0.000224±0.000012	0.031127±0.000358	0.000507±0.000008
625	613.4±25.9	26.34	0.25	-1344	1.171e-14	0.08	0.300358±0.001383	0.052497±0.000100	0.000665±0.000035	0.111794±0.000325	0.000780±0.000010
700	521.8±12.6	23.57	0.21	-6873	2.675e-14	0.27	0.766855±0.001115	0.141022±0.000116	0.002144±0.000030	0.355044±0.000639	0.002083±0.000014
775	531.5±9.7	36.92	0.27	-13025	3.097e-14	0.47	0.566774±0.000724	0.160228±0.000138	0.002286±0.000020	0.306112±0.000884	0.001295±0.000013
850	540.9±11.5	38.49	0.33	-6515	2.221e-14	0.61	0.389932±0.000367	0.112880±0.000089	0.001565±0.000038	0.179168±0.000618	0.000862±0.000011
925	528.7±17.5	26.85	0.22	-6113	1.566e-14	0.72	0.393993±0.000522	0.081454±0.000075	0.001200±0.000045	0.190471±0.000476	0.001029±0.000012
1025	576.0±29.7	19.42	0.14	-5783	1.07e-14	0.78	0.372349±0.000841	0.051156±0.000092	0.000829±0.000037	0.196854±0.000667	0.001071±0.000012
1150	510.5±21.3	14.42	0.13	2059	1.331e-14	0.88	0.623707±0.000588	0.071821±0.000153	0.001438±0.000065	0.294455±0.000345	0.001889±0.000012
1275	593.2±37.5	4.55	0.03	974	1.769e-14	0.98	2.628139±0.001017	0.082890±0.000121	0.003070±0.000053	1.401835±0.001698	0.008883±0.000024
1350	735.6±97.0	6.87	0.04	1398	4.198e-15	1	0.412960±0.000468	0.015830±0.000066	0.000505±0.000033	0.226281±0.001053	0.001365±0.000012
Packet IRR332-ZB, Experiment #15Z0019, 0.1546 g Basalt, all errors ±1 sigma
J = 0.0002253073397±2.7549E-07
40Ar* is radiogenic argon, isotopes in volts (1.48e-13 moles/volt), corrected for blank, background, discrimination, and decay
Calculated bulk K/Ca = 0.125 ± 0.059, Calculated K2O = 1.28%wt., Calculated CaO = 12.57%wt., Calculated Cl = 1.2e-2ppm
Total Gas Age = 549.3 ± 6.7 ka
Weighted Mean Plateau Age = 533.0 ± 6.2 ka (±1 sigma, including ±J), 89.5% 39Ar released
Weighted Mean Plateau Age = 533.0 ± 5.6 ka (A priori, including ±J), 89.5% 39Ar released
Weighted Mean Plateau Age = 533.0 ± 14.2 ka (95% confidence, including ±J)
MSWD = 1.19 (Good fit, MSWD < 2.40)
Steps 7 of 10 (700,775,850,925,1025,1150,1275°C)
Isochron Age = 526.4 ± 7.9 ka (±1 sigma, including ±J)
Isochron Age = 526.4 ± 7.6 ka (A Priori Errors, including ±J)
Isochron Age = 526.4 ± 18.7 ka (95% confidence, including ±J)
MSWD = 1.10 (Good fit, MSWD < 2.56)
40Ar/36Ar intercept = 296.7 ± 1.0 (±1 sigma)
40Ar/36Ar intercept = 296.7 ± 0.9 (A Priori)
40Ar/36Ar intercept = 296.7 ± 2.3 (95% confidence)
Steps 7 of 10 (700,775,850,925,1025,1150,1275°C)
-----------------
R15DS174	Fluence monitor = Bodie Hills sanidine @ 9.7970 ± 0.0031 Ma, equivalent to Fish Canyon sanidine @ 28.1053 ± 0.0124 Ma with R(FCs/BHs) of 2.88340 ± 0.00089
Temp(°C)	Age(ka)	%40Ar*	K/Ca	K/Cl	moles 40Ar*	%39Ar	40Ar	39Ar	38Ar	37Ar	36Ar
550	613.6±58.4	22.56	0.22	-550	4.207e-15	0.04	0.125993±0.000267	0.018759±0.000049	0.000162±0.000020	0.045423±0.000581	0.000339±0.000009
625	550.2±24.4	21.3	0.23	-582	1.477e-14	0.18	0.468784±0.000886	0.073456±0.000091	0.000659±0.000056	0.165133±0.000277	0.001282±0.000014
700	613.9±27.2	15.23	0.22	-753	1.711e-14	0.32	0.759176±0.001199	0.076233±0.000139	0.000975±0.000084	0.180810±0.000623	0.002206±0.000017
775	492.0±27.4	15.56	0.23	-1567	1.039e-14	0.43	0.451145±0.000358	0.057762±0.000074	0.000843±0.000043	0.131908±0.000754	0.001313±0.000013
825	455.2±41.8	18.88	0.23	-3613	4.873e-15	0.49	0.174436±0.000202	0.029281±0.000053	0.000440±0.000021	0.065973±0.000566	0.000492±0.000010
900	520.7±45.8	15.56	0.17	-1158	4.652e-15	0.54	0.202067±0.000228	0.024452±0.000059	0.000340±0.000022	0.077288±0.000267	0.000593±0.000009
975	507.7±70.1	11.53	0.1	-740	3.341e-15	0.57	0.195766±0.000254	0.018040±0.000047	0.000244±0.000029	0.095676±0.000543	0.000607±0.000010
1050	532.8±57.5	9.01	0.12	-4254	5.441e-15	0.63	0.407991±0.000263	0.027979±0.000056	0.000575±0.000022	0.120918±0.000386	0.001277±0.000013
1100	562.2±51.4	7.53	0.15	-5043	5.636e-15	0.68	0.505758±0.000248	0.027449±0.000042	0.000633±0.000035	0.098721±0.000258	0.001594±0.000012
1150	581.2±46.4	8.11	0.13	1603	7.967e-15	0.75	0.663721±0.000271	0.037547±0.000064	0.000979±0.000037	0.151053±0.000925	0.002085±0.000014
1200	576.4±27.5	8.03	0.06	7246	1.707e-14	0.91	1.436196±0.000424	0.081345±0.000091	0.001960±0.000033	0.672540±0.001037	0.004613±0.000018
1250	775.8±52.4	6.47	0.03	2900	1.102e-14	0.98	1.150732±0.000423	0.039332±0.000057	0.001266±0.000023	0.765563±0.000686	0.003820±0.000016
1350	3575.2±139.2	18.71	0.02	-1165	1.289e-14	1	0.465401±0.000228	0.010013±0.000029	0.000338±0.000020	0.246360±0.000796	0.001336±0.000011
Packet IRR354-QF, Experiment #16Z0248, 0.1584 g Basalt, all errors ±1 sigma
J = 0.000224093108214 ± 3.68265E-07	2016-08-25
40Ar* is radiogenic argon, isotopes in volts (1.48e-13 moles/volt), corrected for blank, background, discrimination, and decay
Calculated bulk K/Ca = 9.678e-2 ± 3.860e-2, Calculated K2O = 0.83%wt., Calculated CaO = 10.55%wt., Calculated Cl = -0.6ppm
Total Gas Age = 627.3 ± 11.1 ka
Weighted Mean Plateau Age = 550.025 ± 14.948 ka (±1 sigma, including ±J), 90.642% 39Ar released
Weighted Mean Plateau Age = 550.025 ± 10.963 ka (A priori, including ±J), 90.642% 39Ar released
Weighted Mean Plateau Age = 550.025 ± 33.813 ka (95% confidence, including ±J)
MSWD = 1.86 (Good fit, MSWD < 2.05)
Plateau K/Ca = 0.1722
Plateau K/Cl = 88.0000
% radiogenic (plateau norm.) = 13.9904
Steps 11 of 13 (550,625,700,775,825,900,975,1050,1100,1150,1200°C)
Isochron Age = 506.932 ± 32.814 ka (±1 sigma, including ±J)
Isochron Age = 506.932 ± 24.962 ka (A Priori Errors, including ±J)
Isochron Age = 506.932 ± 73.090 ka (95% confidence, including ±J)
MSWD = 1.73 (Good fit, MSWD < 2.11)
40Ar/36Ar intercept = 301.8 ± 2.3 (±1 sigma)
40Ar/36Ar intercept = 301.8 ± 1.8 (A Priori)
40Ar/36Ar intercept = 301.8 ± 5.2 (95% confidence)
Steps 11 of 13 (550,625,700,775,825,900,975,1050,1100,1150,1200°C)
-----------------
R15DS174	Fluence monitor = Bodie Hills sanidine @ 9.7970 ± 0.0031 Ma, equivalent to Fish Canyon sanidine @ 28.1053 ± 0.0124 Ma with R(FCs/BHs) of 2.88340 ± 0.00089
Temp(°C)	Age(ka)	%40Ar*	K/Ca	K/Cl	moles 40Ar*	%39Ar	40Ar	39Ar	38Ar	37Ar	36Ar
550	532.8±70.1	17.48	0.18	-1481	2.791e-15	0.03	0.107946±0.000123	0.014596±0.000033	0.000206±0.000014	0.043541±0.000292	0.000311±0.000008
625	584.5±31.8	20.99	0.2	-725	9.09e-15	0.13	0.292644±0.000506	0.043315±0.000067	0.000460±0.000018	0.113243±0.000531	0.000806±0.000011
700	571.7±30.9	14.14	0.2	-565	1.713e-14	0.31	0.818607±0.001609	0.083443±0.000163	0.000909±0.000152	0.213289±0.000478	0.002414±0.000020
775	441.9±27.2	11.77	0.22	-1209	9.468e-15	0.44	0.543706±0.000455	0.059671±0.000072	0.000876±0.000048	0.143622±0.000155	0.001647±0.000013
950	525.9±31.9	12.71	0.17	-1206	1.048e-14	0.56	0.556974±0.000277	0.055495±0.000069	0.000841±0.000052	0.170266±0.000230	0.001676±0.000014
1025	551.3±54.3	9.87	0.11	-766	4.655e-15	0.62	0.318746±0.000329	0.023558±0.000049	0.000361±0.000024	0.116575±0.000354	0.000995±0.000010
1100	496.8±40.4	7.49	0.15	-2107	7.561e-15	0.71	0.681847±0.000234	0.042422±0.000058	0.000870±0.000053	0.147325±0.000635	0.002154±0.000014
1150	508.0±46.6	7.36	0.13	1728	6.195e-15	0.78	0.568866±0.000303	0.033999±0.000059	0.000864±0.000045	0.140505±0.000592	0.001805±0.000013
1200	610.6±32.8	8.57	0.06	9219	1.46e-14	0.93	1.151574±0.000401	0.066923±0.000084	0.001584±0.000053	0.633048±0.001073	0.003704±0.000017
1250	745.8±80.4	5.09	0.02	4814	6.871e-15	0.99	0.912929±0.000315	0.026138±0.000059	0.000926±0.000022	0.746106±0.001371	0.003112±0.000016
1350	3883.0±250.6	14.68	0.01	-923	8.603e-15	1	0.396089±0.000256	0.006343±0.000037	0.000273±0.000018	0.267112±0.000886	0.001207±0.000012
Packet IRR354-QJ, Experiment #16Z0252, 0.1478 g Basalt, all errors ±1 sigma
J = 0.000228100284181 ± 4.63317E-07	2016-08-29
40Ar* is radiogenic argon, isotopes in volts (1.48e-13 moles/volt), corrected for blank, background, discrimination, and decay
Calculated bulk K/Ca = 8.710e-2 ± 3.504e-2, Calculated K2O = 0.77%wt., Calculated CaO = 10.78%wt., Calculated Cl = -0.6ppm
Total Gas Age = 596.7 ± 12.7 ka
Weighted Mean Plateau Age = 544.308 ± 22.015 ka (±1 sigma, including ±J), 48.801% 39Ar released
Weighted Mean Plateau Age = 544.308 ± 17.392 ka (A priori, including ±J), 48.801% 39Ar released
Weighted Mean Plateau Age = 544.308 ± 70.052 ka (95% confidence, including ±J)
MSWD = 1.60 (Good fit, MSWD < 2.77)
Plateau K/Ca = 0.1185
Plateau K/Cl = 2246.0000
% radiogenic (plateau norm.) = 9.3499
Steps 5 of 11 (950,1025,1100,1150,1200°C)
Isochron Age = 474.377 ± 106.963 ka (±1 sigma, including ±J)
Isochron Age = 474.377 ± 78.805 ka (A Priori Errors, including ±J)
Isochron Age = 474.377 ± 246.649 ka (95% confidence, including ±J)
MSWD = 1.84 (Good fit, MSWD < 3.12)
40Ar/36Ar intercept = 302.4 ± 5.7 (±1 sigma)
40Ar/36Ar intercept = 302.4 ± 4.2 (A Priori)
40Ar/36Ar intercept = 302.4 ± 13.2 (95% confidence)
Steps 5 of 11 (950,1025,1100,1150,1200°C)
-----------------
R16DD222	Fluence monitor = Bodie Hills sanidine @ 9.7970 ± 0.0031 Ma, equivalent to Fish Canyon sanidine @ 28.1053 ± 0.0124 Ma with R(FCs/BHs) of 2.88340 ± 0.00089
Temp(°C)	Age(ka)	%40Ar*	K/Ca	K/Cl	moles 40Ar*	%39Ar	40Ar	39Ar	38Ar	37Ar	36Ar
550	427.1±28.7	17.6	0.3	4572	4.046e-15	0.04	0.323129±0.000294	0.053300±0.000091	0.000919±0.000043	0.092726±0.000461	0.000918±0.000013
625	421.5±16.4	24.69	0.33	5691	9.075e-15	0.13	0.516678±0.000343	0.121130±0.000165	0.001931±0.000053	0.195064±0.000533	0.001358±0.000017
675	406.5±18.2	24.03	0.27	6078	7.452e-15	0.21	0.435991±0.000320	0.103155±0.000129	0.001640±0.000058	0.198155±0.001173	0.001165±0.000016
750	428.4±21.6	18.1	0.22	10462	7.362e-15	0.29	0.571625±0.000325	0.096734±0.000108	0.001609±0.000071	0.234698±0.000952	0.001634±0.000017
825	362.8±24.9	13.13	0.31	17222	4.928e-15	0.34	0.527521±0.000333	0.076420±0.000129	0.001313±0.000039	0.130688±0.000377	0.001571±0.000016
925	415.9±26.4	13	0.27	-9014	6.152e-15	0.41	0.665343±0.000307	0.083229±0.000140	0.001420±0.000050	0.160296±0.000620	0.001984±0.000018
1025	374.0±25.5	12.49	0.19	8598	6.038e-15	0.48	0.679338±0.000460	0.090903±0.000140	0.001618±0.000071	0.249599±0.002208	0.002061±0.000019
1125	400.7±13.8	16	0.18	25065	1.508e-14	0.64	1.324688±0.000444	0.211891±0.000173	0.003532±0.000081	0.611418±0.000705	0.003898±0.000024
1175	422.0±11.9	16.2	0.09	3368	2.46e-14	0.89	2.135042±0.000673	0.329034±0.000302	0.005909±0.000059	2.012454±0.004636	0.006557±0.000030
1225	432.3±25.9	10.81	0.05	4353	9.722e-15	0.99	1.263702±0.000508	0.127396±0.000171	0.002538±0.000051	1.442547±0.003113	0.004180±0.000026
1300	541.5±175.6	6.43	0.03	-7313	1.17e-15	1	0.255809±0.000300	0.012289±0.000078	0.000309±0.000043	0.200971±0.002166	0.000858±0.000018
1400	403.9±340.4	3.02	0.02	-541	3.761e-16	1	0.175259±0.000278	0.005325±0.000061	0.000138±0.000023	0.128342±0.000896	0.000605±0.000015
Packet IRR357-SU, Experiment #16Z0322, 0.1617 g Basalt, all errors ±1 sigma
J = 0.000221661294 ± 0.000000279551	2016-11-29
40Ar* is radiogenic argon, isotopes in volts (7.12e-14 moles/volt), corrected for blank, background, discrimination, and decay
Calculated bulk K/Ca = 0.121 ± 5.619e-2, Calculated K2O = 1.00%wt., Calculated CaO = 10.09%wt., Calculated Cl = 0.2ppm
Total Gas Age = 412.8 ± 6.3 ka
Weighted Mean Plateau Age = 411.5 ± 5.9 ka (±1 sigma, including ±J), 100.0% 39Ar released
Weighted Mean Plateau Age = 411.5 ± 5.9 ka (A priori, including ±J), 100.0% 39Ar released
Weighted Mean Plateau Age = 411.5 ± 12.6 ka (95% confidence, including ±J)
MSWD = 0.90 (Good fit, MSWD < 1.99)
Plateau K/Ca = 0.184
Plateau K/Cl = 8246
% radiogenic (plateau norm.) = 16.5
Steps 12 of 12 (550,625,675,750,825,925,1025,1125,1175,1225,1300,1400°C)
Isochron Age = 409.9 ± 20.8 ka (±1 sigma, including ±J)
Isochron Age = 409.9 ± 20.7 ka (A Priori Errors, including ±J)
Isochron Age = 409.9 ± 47.0 ka (95% confidence, including ±J)
MSWD = 1.01 (Good fit, MSWD < 2.05)
40Ar/36Ar intercept = 298.7 ± 2.9 (±1 sigma)
40Ar/36Ar intercept = 298.7 ± 2.8 (A Priori)
40Ar/36Ar intercept = 298.7 ± 6.5 (95% confidence)
Steps 12 of 12 (550,625,675,750,825,925,1025,1125,1175,1225,1300,1400°C)
-----------------
R15DD035	Fluence monitor = Bodie Hills sanidine @ 9.7970 ± 0.0031 Ma, equivalent to Fish Canyon sanidine @ 28.1053 ± 0.0124 Ma with R(FCs/BHs) of 2.88340 ± 0.00089
Temp(°C)	Age(ka)	%40Ar*	K/Ca	K/Cl	moles 40Ar*	%39Ar	40Ar	39Ar	38Ar	37Ar	36Ar
550	1824.3±303.1	3.18	0.18	-360	3.058e-15	0.01	0.648955±0.000472	0.004737±0.000031	0.000400±0.000027	0.014026±0.000309	0.002108±0.000011
625	798.4±186.8	2.15	0.18	-525	2.984e-15	0.03	0.937007±0.000694	0.010563±0.000061	0.000627±0.000040	0.031555±0.000256	0.003080±0.000016
700	646.3±70.8	2.75	0.16	-821	7.259e-15	0.1	1.783262±0.000460	0.031749±0.000086	0.001340±0.000081	0.103418±0.000566	0.005838±0.000018
775	591.0±100.7	2.68	0.15	-2433	8.519e-15	0.19	2.149323±0.000845	0.040751±0.000114	0.001777±0.000114	0.139044±0.000368	0.007045±0.000033
850	399.8±54.9	1.97	0.21	8362	5.087e-15	0.27	1.742524±0.000396	0.035955±0.000050	0.001563±0.000027	0.089562±0.000762	0.005746±0.000016
925	452.9±122.8	2.19	0.23	-6319	5.158e-15	0.34	1.593477±0.000586	0.032172±0.000087	0.001379±0.000033	0.072506±0.000544	0.005241±0.000032
1000	587.6±104.9	2.77	0.2	2396	6.502e-15	0.41	1.588307±0.000571	0.031266±0.000099	0.001436±0.000034	0.082872±0.001186	0.005196±0.000026
1075	525.4±67.1	2.85	0.19	3016	5.931e-15	0.48	1.404192±0.000676	0.031900±0.000049	0.001321±0.000041	0.085861±0.001079	0.004593±0.000017
1150	388.3±51.7	1.99	0.21	2215	8.103e-15	0.61	2.752881±0.001034	0.058970±0.000088	0.002582±0.000052	0.150277±0.000633	0.009079±0.000024
1200	447.0±48.4	2.33	0.14	1314	1.029e-14	0.75	2.988378±0.001553	0.065088±0.000072	0.002901±0.000061	0.237136±0.001049	0.009843±0.000025
1250	408.4±40.9	2.1	0.05	2001	1.357e-14	0.96	4.363006±0.001668	0.094366±0.000112	0.004138±0.000080	0.950231±0.004150	0.014573±0.000030
1300	414.7±114.3	1.67	0.03	-33821	2.764e-15	1	1.114987±0.000481	0.019017±0.000047	0.000941±0.000034	0.314299±0.000738	0.003760±0.000017
1400	21576.9±14786.9	5.16	0	-159	7.609e-16	1	0.099639±0.000213	0.000131±0.000026	0.000059±0.000009	0.044810±0.000407	0.000329±0.000011
Packet IRR355-RM, Experiment #16Z0305, 0.1529 g Basalt, all errors ±1 sigma
J = 0.000231408468063702 ± 4.1926E-07	2016-11-07
40Ar* is radiogenic argon, isotopes in volts (1.48e-13 moles/volt), corrected for blank, background, discrimination, and decay
Calculated bulk K/Ca = 0.103 ± 4.784e-2, Calculated K2O = 0.73%wt., Calculated CaO = 8.70%wt., Calculated Cl = 0.1ppm
Total Gas Age = 495.7 ± 22.1 ka
Weighted Mean Plateau Age = 438.9 ± 21.0 ka (±1 sigma, including ±J), 89.7% 39Ar released
Weighted Mean Plateau Age = 438.9 ± 20.9 ka (A priori, including ±J), 89.7% 39Ar released
Weighted Mean Plateau Age = 438.9 ± 49.7 ka (95% confidence, including ±J)
MSWD = 1.01 (Good fit, MSWD < 2.19)
Plateau K/Ca = 0.148
Plateau K/Cl = -156
% radiogenic (plateau norm.) = 2.3
Steps 9 of 13 (775,850,925,1000,1075,1150,1200,1250,1300°C)
Isochron Age = 314.1 ± 357.8 ka (±1 sigma, including ±J)
Isochron Age = 314.1 ± 337.9 ka (A Priori Errors, including ±J)
Isochron Age = 314.1 ± 797.2 ka (95% confidence, including ±J)
MSWD = 1.12 (Good fit, MSWD < 2.29)
40Ar/36Ar intercept = 300.5 ± 5.5 (±1 sigma)
40Ar/36Ar intercept = 300.5 ± 5.2 (A Priori)
40Ar/36Ar intercept = 300.5 ± 12.3 (95% confidence)
Steps 9 of 13 (775,850,925,1000,1075,1150,1200,1250,1300°C)
-----------------
R14AC84	Fluence monitor = Bodie Hills sanidine @ 9.635 ± 0.003 Ma, equivalent to Fish Canyon sanidine @ 27.642 ± 0.012 Ma with R(FCs/BHs) of 2.88340 ± 0.00089
Temp(°C)	Age(ka)	%40Ar*	K/Ca	K/Cl	moles 40Ar*	%39Ar	40Ar	39Ar	38Ar	37Ar	36Ar
550	487.9±137.3	4.44	0.14	-1148	1.692e-15	0.01	0.257729±0.000644	0.009457±0.000052	0.000246±0.000038	0.035113±0.000260	0.000843±0.000011
625	239.3±76.2	4.83	0.17	-19708	3.04e-15	0.07	0.424997±0.001083	0.034634±0.000121	0.000706±0.000056	0.104480±0.000309	0.001398±0.000022
700	250.9±36.1	6.9	0.2	1450	6.621e-15	0.17	0.648810±0.001143	0.071920±0.000189	0.001544±0.000041	0.184863±0.000217	0.002096±0.000021
775	278.6±31.4	9.39	0.28	1509	7.24e-15	0.28	0.516979±0.000572	0.070249±0.000115	0.001422±0.000028	0.133567±0.000797	0.001622±0.000018
850	238.2±21.8	8.27	0.34	637	5.892e-15	0.38	0.481496±0.000284	0.067360±0.000175	0.001620±0.000088	0.103503±0.000288	0.001524±0.000012
925	344.8±38.4	13.72	0.28	1013	4.954e-15	0.44	0.244035±0.000276	0.039133±0.000118	0.000815±0.000049	0.072559±0.000429	0.000733±0.000013
1025	366.2±45.3	8.53	0.23	788	5.324e-15	0.5	0.421538±0.000336	0.039602±0.000087	0.000982±0.000044	0.090100±0.000331	0.001330±0.000015
1150	336.1±34.7	3.84	0.18	1038	1.077e-14	0.63	1.896548±0.000806	0.087395±0.000132	0.002669±0.000047	0.257082±0.000655	0.006244±0.000025
1250	413.7±22.1	3.7	0.05	1127	3.467e-14	0.98	6.334310±0.002145	0.229693±0.000160	0.007803±0.000068	2.467593±0.002003	0.021336±0.000039
1350	490.5±110.3	5.67	0.06	913	2.55e-15	1	0.301791±0.000281	0.014118±0.000040	0.000434±0.000032	0.118321±0.000200	0.000997±0.000013
Packet IRR334-AO, Experiment #15Z0078, 0.1489 g Trachyte, all errors ±1 sigma
J = 0.000223168611408±0.000000223674512
40Ar* is radiogenic argon, isotopes in volts (1.49e-13 moles/volt), corrected for blank, background, discrimination, and decay
Calculated bulk K/Ca = 9.723e-2 ± 6.8346e-2, Calculated K2O = 1.13%wt., Calculated CaO = 14.29%wt., Calculated Cl = 1.1ppm
Total Gas Age = 340.2 ± 12.0 ka
Weighted Mean Plateau Age = 284.0 ± 19.3 ka (±1 sigma, including ±J), 63.4% 39Ar released
Weighted Mean Plateau Age = 284.0 ± 12.8 ka (A priori, including ±J), 63.4% 39Ar released
Weighted Mean Plateau Age = 284.0 ± 44.5 ka (95% confidence, including ±J)
MSWD = 2.27 (Good fit, MSWD < 2.29)
Steps 8 of 10 (550,625,700,775,850,925,1025,1150°C)
Isochron Age = 232.5 ± 36.1 ka (±1 sigma, including ±J)
Isochron Age = 232.5 ± 26.6 ka (A Priori Errors, including ±J)
Isochron Age = 232.5 ± 85.4 ka (95% confidence, including ±J)
MSWD = 1.84 (Good fit, MSWD < 2.40)
40Ar/36Ar intercept = 299.5 ± 2.5 (±1 sigma)
40Ar/36Ar intercept = 299.5 ± 1.9 (A Priori)
40Ar/36Ar intercept = 299.5 ± 5.9 (95% confidence)
Steps 8 of 10 (550,625,700,775,850,925,1025,1150°C)
-----------------
R16MS058	Fluence monitor = Bodie Hills sanidine @ 9.7970 ± 0.0031 Ma, equivalent to Fish Canyon sanidine @ 28.1053 ± 0.0124 Ma with R(FCs/BHs) of 2.88340 ± 0.00089
Temp(°C)	Age(ka)	%40Ar*	K/Ca	K/Cl	moles 40Ar*	%39Ar	40Ar	39Ar	38Ar	37Ar	36Ar
550	498.7±69.2	10.81	0.23	-5842	2.459e-15	0.03	0.319609±0.000439	0.027757±0.000072	0.000524±0.000043	0.063406±0.000628	0.000972±0.000016
625	384.9±25.5	13.39	0.25	-3612	5.726e-15	0.11	0.601106±0.000655	0.083759±0.000113	0.001331±0.000055	0.177863±0.001201	0.001793±0.000018
[truncated: 3,465 more rows]
